# Supplementary material for: Psychometric archetypes reveal biological signatures of vulnerability, resilience, and future mental health
Source: Research Square preprint supplement (doi:10.21203/rs.3.rs-8594362/v1), 2026-02-03
Supplement: Supplementary file 1 [file 1c861d946b3beb87e6938653.pdf]

**Table 3 |** Predictive performance of prediction participants with any psychiatric diagnosis at follow-up in training and modeling details for tested feature sets

| Feature Set                          | PR-AUC (cross-validated) | 95% CI        | Significant (vs. baseline) | Feature Selection Method                              | Model Description                                                                                                                  | PR AUC (held-out test set) |
|--------------------------------------|--------------------------|---------------|----------------------------|-------------------------------------------------------|------------------------------------------------------------------------------------------------------------------------------------|----------------------------|
| Top 20 A1 - Biology + psychometry    | 0.801                    | [0.733,0.866] | Yes                        | None                                                  | SVM (C-SVC, Polynomial Kernel; cost = 0.001, $\gamma$ = 0.01, degree = 2)                                                          | 0.700                      |
| Top 15 A1 - Biology                  | 0.780                    | [0.714,0.845] | Yes                        | None                                                  | Ridge Logistic Regression ( $\lambda$ = 100.0)                                                                                     | NA                         |
| Top 5 A1 - Psychometry               | 0.782                    | [0.710,0.848] | Yes                        | None                                                  | SVM (C-SVC, Polynomial Kernel; cost = 0.001, $\gamma$ = 1.0, degree = 2)                                                           | NA                         |
| Top 40 A1+A5 - Biology + psychometry | 0.782                    | [0.707,0.850] | Yes                        | None                                                  | SVM (C-SVC, Gaussian Kernel; cost = 0.01, $\gamma$ = 0.1)                                                                          | NA                         |
| Top 30 A1+A5 - Biology               | 0.772                    | [0.706,0.833] | Yes                        | None                                                  | Random Forest (1000 trees, deviance criterion, min leaf size = 5, splits = 1, $\alpha$ = 1, variables to split = $1.291\sqrt{n}$ ) | NA                         |
| Top 10 A1+A5 - Psychometry           | 0.753                    | [0.680,0.822] | Yes                        | None                                                  | SVM (C-SVC, Gaussian Kernel; cost = 0.001, $\gamma$ = 0.01)                                                                        | NA                         |
| All features - Biology + psychometry | 0.714                    | [0.651,0.772] | Yes                        | SES (maxK = 2, $\alpha$ = 0.1 and budget = 3 * nvars) | SVM (C-SVC, Polynomial Kernel; cost = 0.001, $\gamma$ = 1.0, degree = 2)                                                           | 0.583                      |
| All features - Biology               | 0.728                    | [0.658,0.792] | Yes                        | LASSO (penalty = 0.0)                                 | SVM (C-SVC, Polynomial Kernel; cost = 0.01, $\gamma$ = 0.01, degree = 3)                                                           | NA                         |
| All features - Psychometry           | 0.737                    | [0.657,0.807] | Yes                        | LASSO (penalty = 0.25)                                | SVM (C-SVC, Gaussian Kernel; cost = 1.0, $\gamma$ = 0.001)                                                                         | NA                         |
