# Supplementary material for: Psychometric archetypes reveal biological signatures of vulnerability, resilience, and future mental health
Source: Research Square preprint supplement (doi:10.21203/rs.3.rs-8594362/v1), 2026-02-03
Supplement: Supplementary file 2 [file 98f858bb244ea11612f1592b.pdf]

**Table 1** | Distribution of self-reported psychiatric diagnoses across categorical archetypes at baseline

|                                                        | Categorical archetypes |          |         |         |         | Mixed    |
|--------------------------------------------------------|------------------------|----------|---------|---------|---------|----------|
|                                                        | A1                     | A2       | A3      | A4      | A5      |          |
| <b># of individuals</b>                                | 22                     | 24       | 26      | 39      | 30      | 117      |
| with any psychiatric diagnosis                         | 7 (32%)                | 5 (21%)  | 3 (12%) | 6 (15%) | 1 (3%)  | 12 (10%) |
| with comorbid psychiatric diagnoses                    | 3 (14%)                | 3 (13%)  | 2 (8%)  | 3 (8%)  | 0 (0%)  | 4 (3%)   |
| with first-degree relatives with psychiatric diagnosis | 10 (45%)               | 10 (42%) | 4 (15%) | 6 (15%) | 8 (27%) | 27 (23%) |
| <b>Diagnostic entities:</b>                            |                        |          |         |         |         |          |
| ADHD                                                   | 2                      | 2        | 2       | 0       | 0       | 2        |
| Anxiety or phobia                                      | 2                      | 1        | 0       | 3       | 1       | 3        |
| Depression                                             | 4                      | 2        | 2       | 5       | 0       | 8        |
| Substance use disorder                                 | 1                      | 0        | 1       | 0       | 0       | 1        |
| Personality disorder                                   | 1                      | 0        | 0       | 1       | 0       | 0        |
| Self-harm                                              | 0                      | 1        | 1       | 0       | 0       | 0        |
| Eating disorder                                        | 2                      | 1        | 0       | 0       | 0       | 0        |
| Stress-related disorder                                | 3                      | 1        | 2       | 0       | 0       | 3        |
