# Supplementary material for: Psychometric archetypes reveal biological signatures of vulnerability, resilience, and future mental health
Source: Research Square preprint supplement (doi:10.21203/rs.3.rs-8594362/v1), 2026-02-03
Supplement: Supplementary file 2 [file f69d7113be1078649ff4c184.xlsx]

## Sheet: Table S1
Table S1 | Individual-level demographic descriptions
Individual-level variables	N	Percent
Gender
Female	143	0.554264
Male	115	0.445736
Student
No	49	0.189922
Yes	209	0.810078
Full-time	197	0.763566
Part-time	6	0.0232558
Sabatical leave	6	0.0232558
Job status
Full-time	16	0.0620155
Part-time	18	0.0697674
Part-time alongside studying	103	0.399225
Unemployed	98	0.379845
Unemployed - non-students	21	0.081
Voluntary work	23	0.0891473
Relationship status
Single	100	0.387597
In a relationship	145	0.562016
Maried	12	0.0465116
Divorced	1	0.00387597

## Sheet: Table S2
Table S2 | Scales, tests and questionnaires included in archetypal analysis
Category	Name	Number of items
Personality/cognition	Boredom Proneness Scale (BPS)	28
Personality/cognition	Barratt Impulsiveness Scale (BIS)	30
	- Attention
	- Motor
	- Cognitive complexity, non-planing
	- Subscale, Cognitive complexity
	- Subscale, Self-control
	- Subscale, Cognitive instability
	- Subscale, Perseverance
	- Subscale, Attention
	- Subscale, Motor
Personality/cognition	Cognitive Failures Questionnaire (CFQ)	25
Personality/cognition	Epworth Sleepiness Scale (ESS)	8
Emotion (regulation)	Difficulties in Emotion Regulation Scale (DERS)	36
	- Nonacceptance of emotional responses
	- Difficulty engaging in goal-directed behaviour
	- Impulse control difficulties
	- Lack of emotional awareness
	- Limited access to emotion regulation strategies
	- Lack of emotional clarity
Emotion (regulation)	The Snaith-Hamilton Pleasure Scale (SHAPS)	14
Perception/sensitivity	Noise Sensitivity Scale (NSS)	21
Imagery	Vividness of Visual Imagery Questionnaire 2 (VVIQ2)	32
Social	Toronto Alexithymia Scale (TAS-20)	20
	- Difficulty identifying feelings
	- Difficulty describing feelings
	- Externallyoriented thinking
Depression	Center for Epidemiologic Studies Depression Scale (CES-D)	20
Emotion (regulation)	Perceived Stress Scale (PSS)	10
Perception/sensitivity	Olfaction Sensitivity Scale (OSS)	20
	- Application
	- Consequence
	- Aggravation
	- Association
Memory	Multifactorial Memory Questionnaire (MMQ)
	- Satisfaction	18
	- Ability	20
	- Strategy	19
Metacognition	Superiority illusion	50
Metacognition	Multidimensional Assessment of Interoceptive Awareness (MAIA2)	37
	- Noticing (Awareness of Body Sensations)
	- Not-Distracting (Emotional Reaction and Attentional Response to Sensations)
	- Not-Worrying (Emotional Reaction and Attentional Response to Sensations)
	- Attention Regulation (Capacity to Regulate Attention)
	- Emotional Awareness (Awareness of Mind-Body Integration)
	- Self-Regulation (Awareness of Mind-Body Integration)
	- Body Listening (Awareness of Mind-Body Integration)
	- Trust (Trusting Body Sensations)
Mindfulness	Freiburg Mindfulness Inventory	14
	- Acceptance
	- Presence
Personality/cognition	NEO-PI	240
	- Anxiety
	- Irritability
	- Depression
	- Self Awareness
	- Impulsivity
	- Vulnerability
	- Warmth
	- Gregariousness
	- Dominance
	- Activity
	- Excitement Seeking
	- Positive Emotions
	- Fantasy
	- Aesthetics
	- Feelings
	- Actions
	- Ideas
	- Values
	- Trust
	- Straightforwardness
	- Altruism
	- Compliance
	- Modesty
	- Sympathy
	- Competence
	- Order
	- Dutifulness
	- Achievement Striving
	- Self Discipline
	- Deliberation
Intelligence	WAIS
	- Verbal Comprehension Index
	- Perceptual Reasoning Index
	- Working Memory Index
	- Processing Speed Index

## Sheet: Table S3
Table S3 | Differences in psychometric measures among discrete archetypes. All phenotypes are summarized as mean. Differences among the discrete archetypes were tested with the Kruskal-Wallis test, and adjusted for multiple testing with the Benjamini-Hochberg procedure to reduce the false discovery rate (FDR).
Scale	Sub-scale	Discrete archetype					Mixed archetype	p-value
		A1	A2	A3	A4	A5
Boredom Proneness Scale (BPS)		108	87.3333	101.231	83.2564	74.2667	86.3162	1.45905e-10
Barratt Impulsiveness Scale (BIS)	Attention	11.6818	10.6667	11.7308	9.25641	8.43333	9.97436	1.73024e-07
	Cognitive instability	7.68182	7.625	7.96154	5.30769	6.06667	6.8547	2.52809e-09
	Motor	13.4545	17.5	18.9615	13.5897	15.2333	15.7607	1.7053e-09
	Perseverance	8.31818	8.91667	8.19231	6.61538	6.3	7.54701	8.84679e-08
	Cognitive complexity	10.6818	10.2917	10.1538	10.8205	9.1	10.3077	0.0378474
	Self-control	12.4091	15.25	14.7692	12.1282	10.8667	12.9231	6.35151e-07
Cognitive failure Questionnaire (CFQ)		77.2727	73.0833	74.6538	59.8718	55.4667	63.9829	1.51686e-13
Epworth Sleepiness Scale (ESS)		15.9545	14.8333	16.0769	14.3846	14.1667	15.2991	0.0743607
Difficulties in Emotion Regulation Scale (DERS)	Nonacceptance of emotional responses	22	15.2917	17.6154	11.1795	11.4667	13.9402	7.32025e-10
	Difficulty engaging in goal-directed behaviour	20.4545	15.1667	17.2692	13.2564	12.7	15.4103	4.07909e-08
	Impulse control difficulties	15.6818	11.625	15.9231	9.25641	8.6	10.9829	1.0406e-09
	Lack of emotional awareness	15.9091	12.2083	16.2308	16.5385	12.0667	13.5983	7.34881e-07
	Limited access to emotion regulation strategies	28.1364	17.375	21.6154	14.7179	13.7	18.1538	1.07502e-12
	Lack of emotional clarity	17.0455	11.5833	15.0385	11.7692	8.4	11.4188	2.53257e-12
Perceived Stress Scale (PSS)		33.0455	21.7917	28.0385	20.0513	18.6	22.9231	1.65882e-12
The Snaith-Hamilton Pleasure Scale (SHAPS)		29.0909	35.75	31.0769	31.9231	37.7333	33.2137	8.42723e-09
Olfaction Sensitivity Scale (OSS)	Association	10.8182	12.1667	11.3077	13.5128	11.3667	12.4017	0.000428364
	Application	12.3636	13	12.6538	15	13.0667	13.5897	0.00629964
	Consequence	14.0909	15.0833	13.5769	15.7692	14.3667	15.0256	0.00953335
	Aggravation	6.31818	6.70833	5.92308	6.66667	6.56667	6.5812	0.0833016
Noise Sensitivity Scale(NSS)		74.5909	76.7917	71.9231	76.7436	73.6333	75.7179	0.256795
Toronto Alexithymia Scale (TAS-20)	Difficulty identifying feelings score	21.3182	16.5417	19.3846	12.5897	11.5667	14.2735	1.51686e-13
	Difficulty describing feelings score	16.4545	12.125	15.3462	13.0513	9.46667	12.8718	3.55342e-07
	Externallyoriented thinking score	17.2273	14.125	20.5	21.5641	15.1333	16.9744	1.96365e-12
Superiority illusion (SI)		49.0802	48.3194	50.6885	49.3851	48.3732	48.9244	0.00495179
Freiburg Mindfulness Inventory (FMI)	Presence	13.9091	17.0833	15.9615	15.3077	18.5333	16.0171	1.97572e-07
	Acceptance	16.2273	22.0833	19.3077	20.0769	22.2667	20.641	1.69788e-07
Multifactorial Memory Questionnaire (MMQ)	Satisfaction scale	53.9091	42	42.1538	34.641	36.9333	38.7094	1.86037e-05
	Ability scale	59.4545	67.375	64.8846	78.8205	78.6333	74.1709	1.17326e-11
	Strategy scale	56.8182	59.5417	55.8846	68.7949	59.8667	62.0256	2.68216e-06
Depression Scale (CES-D)		27.2273	10.875	15.6923	8.71795	6.63333	11.1624	1.10789e-12
Personality Inventory (NEO-PI)
- Neuroticism	Anxiety	1.25	0.1875	0.215385	-0.169231	-0.0866667	0.186325	4.89302e-05
	Irritability	0.259091	-0.645833	0.807692	-0.761538	-0.803333	-0.293162	3.12983e-10
	Depression	1.55	0.3	0.296154	-0.241026	-0.533333	0.179487	1.10789e-12
	Awareness	1.51818	0.291667	0.0461538	-0.0410256	-0.226667	0.251282	2.36167e-07
	Impulsivity	0.404545	0.691667	1.04231	-0.407692	-0.3	0.125641	8.23741e-09
	Vulnerability	1.45	0.375	0.0269231	-1.42892e-18	-0.58	0.0495726	1.33231e-07
- Extraversion	Warmth	-0.981818	0.658333	-0.111538	-0.45641	0.816667	0.171795	1.07763e-08
	Gregariousness	-1.27273	0.1375	0.0230769	-0.302564	0.186667	-0.017094	1.69445e-05
	Dominance	-1.03636	0.025	0.5	-0.351282	0.293333	-0.101709	1.77543e-05
	Activity	-0.972727	0.283333	0.284615	-0.407692	0.486667	-0.160684	1.0804e-05
	Excitement Seeking	-0.409091	0.391667	0.896154	-0.438462	0.286667	0.123077	7.34881e-07
	Positive Emotions	-1.10909	1.09167	0.0615385	-0.333333	0.786667	0.203419	3.53646e-11
- Openness to Experience	Fantasy	0.372727	1.36667	0.688462	-0.176923	0.42	0.417949	1.97572e-07
	Aesthetics	0.472727	1.8625	0.0576923	-0.569231	0.496667	0.350427	2.12558e-11
	Feelings	0.4	1.15417	-0.126923	-0.871795	0.3	0.111966	1.7053e-09
	Actions	-0.336364	1.1875	0.207692	-0.220513	0.466667	0.302564	3.84111e-08
	Ideas	0.727273	1.84167	1.02308	-0.341026	0.996667	0.738462	5.0316e-11
	Values	1.01364	1.77917	-0.265385	0.225641	0.35	0.691453	1.04248e-11
- Agreeableness	Trust	-0.263636	0.958333	-0.538462	0.520513	0.86	0.383761	8.58208e-08
	Straightforwardness	0.627273	0.333333	-1.11538	0.376923	0.386667	0.133333	8.66306e-08
	Altruism	-0.1	0.425	-0.707692	-0.115385	0.7	0.190598	9.92695e-06
	Compliance	0.972727	0.845833	-0.946154	0.505128	0.11	0.27094	5.42381e-09
	Modesty	0.840909	-0.341667	-1.22692	-0.0128205	-0.383333	-0.108547	3.05453e-08
	Sympathy	0.631818	1.40417	-0.446154	-0.0615385	0.42	0.260684	4.23442e-10
- Conscientiousness	Competence	-0.863636	-0.5375	-0.453846	0.0384615	0.713333	-0.0888889	1.19513e-08
	Order	-0.622727	-0.991667	-0.276923	0.305128	0.693333	-0.193162	3.38246e-08
	Dutifulness	-0.536364	-0.995833	-0.673077	0.0769231	0.813333	-0.221368	1.08492e-08
	Striving	-1.12273	-0.0375	0.392308	-0.15641	0.993333	-0.0307692	5.42381e-09
	Discipline	-1.55455	-1.19583	-0.707692	-0.24359	0.38	-0.495726	2.66757e-10
	Deliberation	0.527273	-0.5875	-0.546154	0.510256	0.653333	0.0837607	9.41492e-08
Wechsler Adult Intelligence Scale (WAIS)	Verbal comprehension index	112.818	115.792	109.538	105.538	106.7	109.701	0.00595724
	Perceptual reasoning index	115.182	117.25	111	113.026	112.733	113.786	0.711396
	Working memory index	104.591	106.875	102.731	106.718	102.133	107.137	0.500817
	Processing speed index	110.818	115.208	112.885	116.513	116.5	114.256	0.613067
Multidimensional Assessment of Interoceptive Awareness (MAIA2)	Noticing	3.875	4.4375	4.47115	3.78205	4.825	4.33333	0.000109413
	Distracting	2.74242	3.34028	3.07051	3.54701	3.63333	3.1396	0.00621068
	Worrying	3.51818	3.95	3.61538	4.32821	3.96	3.94872	0.0118268
	Regulation	3.55844	4.125	3.73626	3.51648	4.66667	3.8547	1.95551e-07
	Awareness	4.31818	4.375	4.13846	3.06154	4.55333	4.09402	2.22614e-08
	Regulation	3.38636	4.05208	3.39423	3.10897	4.725	3.73932	1.06417e-09
	Listening	2.90909	3.94444	2.98718	2.24786	3.88889	3.1339	6.81698e-08
	Trust	3.69697	4.58333	4.16667	4.37607	5.42222	4.63533	2.5055e-07

## Sheet: Table S4
Table S4 | Percentage of first-degree family members with psychiatric diagnoses among discrete archetypes. Differences among the archetypes were tested with the Kruskal-Wallis test and adjusted for multiple testing with the Benjamini-Hochberg procedure to reduce the false discovery rate (FDR).
	Discrete archetype					Mixed archetype	p-value
	A1	A2	A3	A4	A5
% Individuals with 1. degree relatives with psychiatric diagnosis	45	42	15	15	27	23	0.0238708
1st degree relatives with:
ADHD	3	2	0	0	1	6
Anxiety and phobias	4	2	0	2	2	9
Bipolar disorder	1	1	0	1	2	4
Borderline personality disorder	1	0	0	0	0	0
Dementia	1	0	0	0	0	0
Depression	8	3	3	3	4	18
Mental retardation	1	0	0	0	0	0
Substance use disorder	2	1	0	0	1	1
OCD	2	0	1	0	0	5
Psychosis	1	1	0	0	1	1
Personality disorder	1	0	0	0	1	0
Developmental disorders	1	0	0	0	0	0
Self-harm	2	0	0	1	0	1
Schizophrenia	0	2	0	1	0	1
Eating disorder	1	4	0	1	0	2
Stress related disorder	7	3	1	3	1	14
Other psychiatric disorder	0	2	0	0	0	0

## Sheet: Table S5
Table S5 | GWAS summary statistics utilized in the study
Name	Domain	Trait	Specification	Brain region	PMID	N	Cases	Controls	Ancestry
Childhood_IQ_PMID23358156	Cognition	Childhood IQ	Childhood IQ		23358156	12441	0	0	European
College_completion_PMID23722424	Cognition	Educational attainment	College completion		23722424	126559	0	0	European
Aggression_PMID26087016	Behavior	Personality	Agression		26087016	18988	0	0	European
Anxiety_PMID26754954	Clinical	ANX	Anxiety		26754954	17310	7016	14745	European
Memory_PMID27046643	Cognition	Memory Functions	Memory		27046643	112067	0	0	European
Subjective_well_being_PMID27089181	Behavior	Well-being	Subjective well being		27089181	298420	0	0	European
Attention_Functions_Allerting_PMID27656889	Cognition	Attention functions	Attention Functions (Allerting)		27656889	1655	0	0	European
Attention_Functions_Executive_function_PMID27656889	Cognition	Attention functions	Attention Functions (Executive function)		27656889	1655	0	0	European
Attention_Functions_Hit_reaction_time_PMID27656889	Cognition	Attention functions	Attention Functions (Hit reaction time)		27656889	1655	0	0	European
Attention_Functions_Orienting_PMID27656889	Cognition	Attention functions	Attention Functions (Orienting)		27656889	1655	0	0	European
Attention_Functions_SD_of_hit_reaction_time_PMID27656889	Cognition	Attention functions	Attention Functions (SD of hit reaction time)		27656889	1655	0	0	European
Cluster_headache_PMID27957625	Clinical	Headache	Cluster headache		27957625	459	99	360	European
Self_reported_tiredness_PMID28194004	Behavior	Sleep measures	Self-reported tiredness		28194004	108976	0	0	European
Borderline_Personality_Disorder_PMID28632202	Clinical	BPD	Borderline Personality Disorder		28632202	2750	1075	1675	European
OCD_PMID28761083	Clinical	OCD	OCD		28761083	9725	2688	7037	European
Suffer_from_nerves_SUF_NERV_PMID29500382	Behavior	Anxiety/tension	Suffer from 'nerves' (SUF-NERV)		29500382	262321	0	0	European
Tense_highly_strung_TENSE_PMID29500382	Behavior	Anxiety/tension	Tense / 'highly strung' (TENSE)		29500382	263635	0	0	European
Worrier_anxious_feelings_WORRY_PMID29500382	Behavior	Anxiety/tension	Worrier / anxious feelings (WORRY)		29500382	264646	0	0	European
Worry_too_long_after_embarrassment_WORR_EMB_PMID29500382	Behavior	Anxiety/tension	Worry too long after embarrassment (WORR-EMB)		29500382	261094	0	0	European
Broad_depression_PMID29662059	Clinical	MDD-related	Broad depression		29662059	322580	113769	208811	European
Major_depressive_disorder_ICD_coded_PMID29662059	Clinical	MDD	MDD (ICD-coded)		29662059	217584	8276	209308	European
Probable_major_dpressive_disorder_PMID29662059	Clinical	MDD-related	Probable major depressive disorder		29662059	174519	30603	143916	European
Verbal_numerical_reasoning_PMID29844566	Cognition	Verbal numbering reasoning	Verbal-numerical reasoning		29844566	300486	0	0	European
Moderate_to_vigorous_physical_activity_levels_PMID29899525	Behavior	Looking After One's Health	Moderate to vigorous physical activity levels		29899525	377234	0	0	European
Strenuous_sports_or_other_exercises_PMID29899525	Behavior	Looking After One's Health	Strenuous sports or other exercises		29899525	350492	124842	225650	European
Vigorous_physical_activity_PMID29899525	Behavior	Looking After One's Health	Vigorous physical activity		29899525	261055	98060	162995	European
Depressive_affect_subcluster_PMID29942085	Behavior	Mood	Depressive affect subcluster		29942085	357957	0	0	European
Depressive_symptoms_PMID29942085	Behavior	Mood	Depressive symptoms		29942085	381455	0	0	European
Worry_subcluster_PMID29942085	Behavior	Anxiety/tension	Worry subcluster		29942085	348219	0	0	European
intelligence_PMID29942086	Cognition	Intelligence	Intelligence		29942086	269867	0	0	European
Social_support_Leisure_social_activities_Pub_or_social_club_PMID29970889	Behavior	Social Interactions	Social support - Leisure/social activities: Pub or social club		29970889	452302	124047	328255	European
Social_support_Leisure_social_activities_Religious_group_PMID29970889	Behavior	Social Interactions	Social support - Leisure/social activities: Religious group		29970889	452302	66259	386043	European
Social_support_Leisure_social_activities_Sports_club_or_gym_PMID29970889	Behavior	Social Interactions	Social support - Leisure/social activities: Sports club or gym		29970889	452302	135060	317242	European
Cognitive_performance_PMID30038396	Cognition	Intelligence	Cognitive performance		30038396	257828	0	0	European
Suicide_attempt_Model_1_PMID30116032	Clinical	Suicide attempt	Suicide attempt (Model 1)		30116032	63401	6024	57377	European
Suicide_attempt_Model_2_PMID30116032	Clinical	Suicide attempt	Suicide attempt (Model 2)		30116032	63401	6024	57377	European
Suicide_attempt_Model_3_PMID30116032	Clinical	Suicide attempt	Suicide attempt (Model 3)		30116032	63401	6024	57377	European
Alcohol_use_disorder_PMID30482948	Clinical	Alcohol use disorder	Alcohol use disorder		30482948	46568	11569	34999	European
Childhood_Absence_Epilepsy_PMID30531953	Clinical	Epilepsy	Childhood Absence Epilepsy		30531953	24996	778	24218	European
Generalized_epilepsy_with_tonic_clonic_seizures_PMID30531953	Clinical	Epilepsy	Generalized epilepsy with tonic-clonic seizures		30531953	24443	225	24218	European
Juvenile_Absence_Epilepsy_JAE_PMID30531953	Clinical	Epilepsy	Juvenile Absence Epilepsy (JAE)		30531953	24633	415	24218	European
Juvenile_Myoclonic_Epilepsy_JME_PMID30531953	Clinical	Epilepsy	Juvenile Myoclonic Epilepsy (JME)		30531953	25395	1177	24218	European
Age_of_initiation_of_regular_smoking_PMID30643251	Behavior	Tobacco-use	Age of initiation of regular smoking		30643251	632802	0	0	European
Drinks_per_week_PMID30643251	Behavior	Alcohol-use	Drinks per week		30643251	537349	0	0	European
Ever_smoked_regulary_PMID30643251	Behavior	Tobacco-use	Ever smoked regulary		30643251	262990	0	0	European
Smoking_cessation_PMID30643251	Behavior	Tobacco-use	Smoking cessation		30643251	312821	0	0	European
Well_being_spectrum_PMID30643256	Behavior	Well-being	Well being spectrum		30643256	80852	0	0	European
Ever_smoker_PMID30643258	Behavior	Tobacco-use	Ever smoker		30643258	518633	0	0	European
General_risk_tolerance_PMID30643258	Behavior	Looking After One's Health	General risk tolerance		30643258	466571	0	0	European
Cross_disorder_ASD_ADHD_PMID30692689	Clinical	Cross-disorder	Cross disorder		30692689	87764	57764	30000	European
Chronotyp_Morningness_PMID30696823	Behavior	Chronotype	Chronotype (Morningness)		30696823	403195	252287	150908	European
Chronotype_Binary_PMID30696823	Behavior	Chronotype	Chronotype (Binary)		30696823	449732	0	0	European
impulsive_personality_traitsattentional_PMID30718321	Behavior	Impulsivity	Impulsive Personality Traits (BIS-11)		30718321	22385	0	0	European
impulsive_personality_traitsmotor_PMID30718321	Behavior	Impulsivity	Impulsive Personality Traits (BIS-11)		30718321	22306	0	0	European
impulsive_personality_traitsnonplanning_PMID30718321	Behavior	Impulsivity	Impulsive Personality Traits (BIS-11)		30718321	22291	0	0	European
impulsive_personality_traitsperseverance_PMID30718321	Behavior	Impulsivity	Impulsive Personality Traits (UPPSP)		30718321	23437	0	0	European
impulsive_personality_traitspositive_urgency_PMID30718321	Behavior	Impulsivity	Impulsive Personality Traits (UPPSP)		30718321	23284	0	0	European
impulsive_personality_traitspremeditation_PMID30718321	Behavior	Impulsivity	Impulsive Personality Traits (UPPSP)		30718321	23321	0	0	European
impulsive_personality_traitssensation_seeking_PMID30718321	Behavior	Impulsivity	Impulsive Personality Traits (UPPSP)		30718321	23292	0	0	European
impulsive_personality_traitstotal_score_PMID30718321	Behavior	Impulsivity	Impulsive Personality Traits (BIS-11)		30718321	21972	0	0	European
Depression_PMID30718901	Clinical	MDD-related	Depression		30718901	500199	170756	329443	European
Autism_spectrum_disorder_PMID30804558	Clinical	ASD	ASD		30804558	46351	18382	27969	European
Daytime_napping_PMID30804565	Behavior	Sleep measures	Daytime napping		30804565	386577	20230	366347	European
Daytime_sleepiness_dozing_PMID30804565	Behavior	Sleep measures	Daytime sleepiness / dozing		30804565	385333	10172	375161	European
Ease_of_getting_up_in_the_morning_PMID30804565	Behavior	Sleep measures	Ease of getting up in the morning		30804565	385949	0	0	European
Insomnia_PMID30804565	Clinical	Insomnia	Insomnia		30804565	386533	109402	277131	European
Tourette_PMID30818990	Clinical	Tourette	Tourette		30818990	14307	4819	9488	European
Long_sleep_PMID30846698	Behavior	Sleep measures	Long sleep		30846698	339926	34184	305742	European
Short_sleep_PMID30846698	Behavior	Sleep measures	Short sleep		30846698	411934	106192	305742	European
Sleep_duration_PMID30846698	Behavior	Sleep measures	Sleep duration		30846698	446118	0	0	European
Anxiety_tension_factors_PMID30867560	Behavior	Anxiety/tension	Anxiety/tension factors		30867560	270059	0	0	European
Neuroticism_general_factor_PMID30867560	Behavior	Personality	Neuroticism general factor		30867560	270059	0	0	European
Worry_vulnerability_factors_PMID30867560	Behavior	Anxiety/tension	Worry/vulnerability factors		30867560	270059	0	0	European
Antidepressant_use_PMID31015401	Behavior	Antidepressants use	Antidepressants use		31015401	304162	33757	270405	European
Anxiety_and_stress_related_disorders_PMID31116379	Clinical	ANX	Anxiety and stress-related disorders		31116379	23839	4584	19255	European
Stress_related_disorder_PMID31116379	Clinical	Stress-related disorder	Stress-related disorder		31116379	29086	9831	19255	European
Anorexia_nervosa_PMID31308545	Clinical	Anorexia nervosa	Anorexia nervosa		31308545	72517	16992	55525	European
Able_to_confide_PMID31427789	Behavior	Loneliness	Able to confide		31427789	374820	0	0	European
Age_completed_full_time_education_PMID31427789	Cognition	Educational attainment	Age completed full time education		31427789	253580	0	0	European
Age_first_had_sexual_intercourse_PMID31427789	Behavior	Sexual Functions	Age first had sexual intercourse		31427789	339614	0	0	European
Alcohol_Alcohol_drinker_status_Never_PMID31427789	Behavior	Alcohol-use	Alcohol - Alcohol drinker status: Never		31427789	386082	12522	373560	European
Alcohol_Alcohol_drinker_status_Previous_vs_Current_PMID31427789	Behavior	Alcohol-use	Alcohol - Alcohol drinker status: Previous vs Current		31427789	373560	13491	360069	European
Alcohol_intake_frequency_PMID31427789	Behavior	Alcohol-use	Alcohol intake frequency		31427789	386082	0	0	European
Amount_of_alcohol_drunk_on_a_typical_drinking_day_PMID31427789	Behavior	Alcohol-use	Amount of alcohol drunk on a typical drinking day		31427789	116163	0	0	European
Anxiety_Ever_felt_worried_tense_or_anxious_for_most_of_a_month_or_longer_PMID31427789	Behavior	Anxiety/tension	Anxiety - Ever felt worried, tense, or anxious for most of a month or longer		31427789	118397	31655	86742	European
Anxiety_Ever_worried_more_than_most_people_would_in_similar_situation_PMID31427789	Behavior	Anxiety/tension	Anxiety - Ever worried more than most people would in similar situation		31427789	106215	27611	78604	European
Anxiety_Reccent_feelings_or_nervousness_or_anxiety_PMID31427789	Behavior	Anxiety/tension	Anxiety - Reccent feelings or nervousness or anxiety		31427789	126325	0	0	European
Anxiety_Recent_easy_annoyance_or_irritability_PMID31427789	Behavior	Anxiety/tension	Anxiety - Recent easy annoyance or irritability		31427789	126198	0	0	European
Anxiety_Recent_feelings_of_foreboding_PMID31427789	Behavior	Anxiety/tension	Anxiety - Recent feelings of foreboding		31427789	126179	0	0	European
Anxiety_Recent_inability_to_stop_or_control_worying_PMID31427789	Behavior	Anxiety/tension	Anxiety - Recent inability to stop or control worying		31427789	126300	0	0	European
Anxiety_Recent_restlessness_PMID31427789	Behavior	Anxiety/tension	Anxiety - Recent restlessness		31427789	126513	0	0	European
Anxiety_Recent_trouble_relaxing_PMID31427789	Behavior	Anxiety/tension	Anxiety - Recent trouble relaxing		31427789	126422	0	0	European
Anxiety_Recent_worrying_too_much_about_different_things_PMID31427789	Behavior	Anxiety/tension	Anxiety - Recent worrying too much about different things		31427789	126284	0	0	European
Bipolar_and_major_depression_status_PMID31427789	Clinical	MDD+BP	Bipolar and major depression status		31427789	93296	25873	67423	European
Cannabis_use_Ever_taken_cannabis_PMID31427789	Behavior	Cannabis use	Cannabis use - Ever taken cannabis		31427789	126632	0	0	European
Depression_Age_at_first_episode_of_depression_PMID31427789	Clinical	MDD-related	Depression - Age at first episode of depression		31427789	65776	0	0	European
Depression_Age_at_last_episode_of_depression_PMID31427789	Clinical	MDD-related	Depression - Age at last episode of depression		31427789	63892	0	0	European
Depression_Depression_possibly_related_to_stressful_or_traumatic_event_PMID31427789	Clinical	MDD-related	Depression - Depression possibly related to stressful or traumatic event		31427789	71568	52198	19370	European
Depression_Did_your_sleep_change_PMID31427789	Clinical	MDD-related	Depression - Did your sleep change?		31427789	61487	48926	12561	European
Depression_Difficulty_concentrating_during_worst_ddepression_PMID31427789	Clinical	MDD-related	Depression - Difficulty concentrating during worst ddepression		31427789	63297	49782	13515	European
Depression_Duration_of_worst_depression_PMID31427789	Clinical	MDD-related	Depression - Duration of worst depression		31427789	70731	0	0	European
Depression_Ever_had_prolonged_feelings_of_sadness_or_depression_PMID31427789	Clinical	MDD-related	Depression - Ever had prolonged feelings of sadness or depression		31427789	126494	69422	57072	European
Depression_Ever_had_prolonged_loss_of_interest_in_normal_activities_PMID31427789	Clinical	MDD-related	Depression - Ever had prolonged loss of interest in normal activities		31427789	126458	49947	76511	European
Depression_Feelings_of_tiredness_during_worst_episode_of_depression_PMID31427789	Clinical	MDD-related	Depression - Feelings of tiredness during worst episode of depression		31427789	64376	52735	11641	European
Depression_Feelings_of_worthlessness_during_worst_period_of_depression_PMID31427789	Clinical	MDD-related	Depression - Feelings of worthlessness during worst period of depression		31427789	67012	34122	32890	European
Depression_Fraction_of_day_affected_during_worst_episode_of_depression_PMID31427789	Clinical	MDD-related	Depression - Fraction of day affected during worst episode of depression		31427789	67326	0	0	European
Depression_Frequency_of_depressed_days_during_worst_episode_of_depression_PMID31427789	Clinical	MDD-related	Depression - Frequency of depressed days during worst episode of depression		31427789	69606	0	0	European
Depression_Impact_of_normal_roles_during_worst_period_of_depression_PMID31427789	Clinical	MDD-related	Depression - Impact of normal roles during worst period of depression		31427789	71674	0	0	European
Depression_Lifetime_number_of_depressed_periods_PMID31427789	Clinical	MDD-related	Depression - Lifetime number of depressed periods		31427789	57986	0	0	European
Depression_Professional_informed_about_depression_PMID31427789	Clinical	MDD-related	Depression - Professional informed about depression		31427789	71538	46191	25347	European
Depression_Recent_changes_in_speed_amount_of_moving_or_speaking_PMID31427789	Clinical	MDD-related	Depression - Recent changes in speed/amount of moving or speaking		31427789	126599	0	0	European
Depression_Recent_feelings_of_depression_PMID31427789	Clinical	MDD-related	Depression - Recent feelings of depression		31427789	126384	0	0	European
Depression_Recent_feelings_of_inadequacy_PMID31427789	Clinical	MDD-related	Depression - Recent feelings of inadequacy		31427789	126203	0	0	European
Depression_Recent_feelings_of_tiredness_or_low_enery_PMID31427789	Clinical	MDD-related	Depression - Recent feelings of tiredness or low enery		31427789	126540	0	0	European
Depression_Recent_lack_of_interenst_of_pleasure_in_doing_things_PMID31427789	Clinical	MDD-related	Depression - Recent lack of interenst of pleasure in doing things		31427789	126489	0	0	European
Depression_Recent_poor_appetite_or_overeting_PMID31427789	Clinical	MDD-related	Depression - Recent poor appetite or overeting		31427789	126639	0	0	European
Depression_Recent_thoughts_of_suicide_or_self_harm_PMID31427789	Clinical	MDD-related	Depression - Recent thoughts of suicide or self-harm		31427789	125844	0	0	European
Depression_Recent_trouble_concentrating_on_things_PMID31427789	Clinical	MDD-related	Depression - Recent trouble concentrating on things		31427789	126633	0	0	European
Depression_Sleeping_too_much_PMID31427789	Clinical	MDD-related	Depression - Sleeping too much		31427789	48926	10136	38790	European
Depression_Thoughts_of_death_during_worst_depression_PMID31427789	Clinical	MDD-related	Depression - Thoughts of death during worst depression		31427789	67593	35139	32454	European
Depression_Trouble_falling_asleep_PMID31427789	Clinical	MDD-related	Depression - Trouble falling asleep		31427789	48926	37098	11828	European
Depression_Trouble_falling_or_staying_asleep_or_sleeping_too_much_PMID31427789	Clinical	MDD-related	Depression - Trouble falling or staying asleep. or sleeping too much		31427789	126545	0	0	European
Depression_Waking_too_early_PMID31427789	Clinical	MDD-related	Depression - Waking too early		31427789	48926	37077	11849	European
Depression_Weight_change_during_worst_episode_of_depression_PMID31427789	Clinical	MDD-related	Depression - Weight change during worst episode of depression		31427789	57130	0	0	European
Diagnoses_secondary_ICD10_F17_Nicotine_dependence_PMID31427789	Clinical	Tobacco-use	Diagnoses - secondary ICD10: F17 Nicotine dependence		31427789	244890	10287	234603	European
Diagnoses_secondary_ICD10_F32_Major_depressive_disorder_single_episode_PMID31427789	Clinical	MDD-related	Diagnoses - secondary ICD10: F32 Major depressive disorder, single episode		31427789	244890	10402	234488	European
Ever_depressed_for_a_whole_week_PMID31427789	Clinical	MDD-related	Ever depressed for a whole week		31427789	126626	68039	58587	European
Ever_highly_irritable_argumentative_for_2_days_PMID31427789	Behavior	Mood	Ever highly irritable/argumentative for 2 days		31427789	126296	22783	103513	European
Ever_unenthusiastic_disinterested_for_a_whole_week_PMID31427789	Behavior	Mood	Ever unenthusiastic/disinterested for a whole week		31427789	123848	45696	78152	European
Family_relationship_satisfaction_PMID31427789	Behavior	Social Interactions	Family relationship satisfaction		31427789	127932	0	0	European
Fed_up_feelings_PMID31427789	Behavior	Mood	Fed-up feelings		31427789	378357	153045	225312	European
Financial_situation_satisfaction_PMID31427789	Behavior	Looking After One's Health	Financial situation satisfaction		31427789	128506	0	0	European
Fluid_intelligence_score_PMID31427789	Cognition	Intelligence	Fluid intelligence score		31427789	125935	0	0	European
Fluid_intelligence_test_FI3_word_interpolation_PMID31427789	Cognition	Fluid intelligence test	Fluid intelligence test - FI3 : word interpolation		31427789	124929	105661	19268	European
Fluid_intelligence_test_FI4_positional_arithmetic_PMID31427789	Cognition	Fluid intelligence test	Fluid intelligence test - FI4 : positional arithmetic		31427789	98875	88101	10774	European
Fluid_intelligence_test_FI5_family_relationship_calculation_PMID31427789	Cognition	Fluid intelligence test	Fluid intelligence test - FI5 : family relationship calculation		31427789	99934	59910	40024	European
Fluid_intelligence_test_FI6_conditional_arithmetic_PMID31427789	Cognition	Fluid intelligence test	Fluid intelligence test - FI6 : conditional arithmetic		31427789	96994	74697	22297	European
Fluid_intelligence_test_FI7_synonym_PMID31427789	Cognition	Fluid intelligence test	Fluid intelligence test - FI7 : synonym		31427789	89892	78651	11241	European
Fluid_intelligence_test_FI8_chained_arithmetic_PMID31427789	Cognition	Fluid intelligence test	Fluid intelligence test - FI8 : chained arithmetic		31427789	68065	52252	15813	European
Fluid_intelligence_test_Fluid_intelligence_score_PMID31427789	Cognition	Fluid intelligence test	Fluid intelligence test - Fluid intelligence score		31427789	99739	0	0	European
Fluid_intelligence_test_Number_of_fluid_intelligence_questions_attempted_within_time_limit_PMID31427789	Cognition	Fluid intelligence test	Fluid intelligence test - Number of fluid intelligence questions attempted within time limit		31427789	125935	0	0	European
Frequency_of_depressed_mood_in_last_2_weeks_PMID31427789	Behavior	Mood	Frequency of depressed mood in last 2 weeks		31427789	370017	0	0	European
Frequency_of_failure_to_fulfil_normal_expectations_fue_to_drinking_alcohol_in_last_year_PMID31427789	Behavior	Alcohol-use	Frequency of failure to fulfil normal expectations fue to drinking alcohol in last year		31427789	69256	0	0	European
Frequency_of_feeling_guilt_or_remorse_after_drinking_alcohol_in_last_year_PMID31427789	Behavior	Alcohol-use	Frequency of feeling guilt or remorse after drinking alcohol in last year		31427789	69203	0	0	European
Frequency_of_friend_family_visits_PMID31427789	Behavior	Social Interactions	Frequency of friend/family visits		31427789	383941	0	0	European
Frequency_of_inability_to_cease_drinking_in_last_year_PMID31427789	Behavior	Alcohol-use	Frequency of inability to cease drinking in last year		31427789	69164	0	0	European
Frequency_of_memory_loss_due_to_drinking_alcohol_in_last_year_PMID31427789	Behavior	Alcohol-use	Frequency of memory loss due to drinking alcohol in last year		31427789	69228	0	0	European
Frequency_of_needing_morning_drink_of_alcohol_after_heavy_drinking_session_in_last_year_PMID31427789	Behavior	Alcohol-use	Frequency of needing morning drink of alcohol after heavy drinking session in last year		31427789	69300	0	0	European
Frequency_of_solarium_sunlamp_use_PMID31427789	Behavior	Looking After One's Health	Frequency of solarium/sunlamp use		31427789	383447	0	0	European
Frequency_of_tenseness_restlessness_in_last_2_weeks_PMID31427789	Behavior	Mood	Frequency of tenseness / restlessness in last 2 weeks		31427789	371869	0	0	European
Frequency_of_tiredness_lethargy_in_last_2_weeks_PMID31427789	Behavior	Mood	Frequency of tiredness / lethargy in last 2 weeks		31427789	375053	0	0	European
Frequency_of_unenthusiasm_disinterest_in_last_2_weeks_PMID31427789	Behavior	Mood	Frequency of unenthusiasm / disinterest in last 2 weeks		31427789	373833	0	0	European
Friendships_satisfaction_PMID31427789	Behavior	Social Interactions	Friendships satisfaction		31427789	127735	0	0	European
Guilty_feelings_PMID31427789	Behavior	Guilty feelings	Guilty feelings		31427789	376361	107559	268802	European
Happiness_and_subjective_well_being_Belief_that_own_life_is_meaningfull_PMID31427789	Behavior	Well-being	Happiness and subjective well-being - Belief that own life is meaningfull		31427789	123818	0	0	European
Happiness_and_subjective_well_being_General_happiness_PMID31427789	Behavior	Well-being	Happiness and subjective well-being - General happiness		31427789	126132	0	0	European
Happiness_and_subjective_well_being_General_happiness_with_own_health_PMID31427789	Behavior	Well-being	Happiness and subjective well-being - General happiness with own health		31427789	126477	0	0	European
Happiness_PMID31427789	Behavior	Well-being	Happiness		31427789	128677	0	0	European
Headaches_for_3_months_PMID31427789	Perception	Pain	Headaches for 3+ months		31427789	75898	34810	41088	European
Health_satisfaction_PMID31427789	Behavior	Looking After One's Health	Health satisfaction		31427789	128745	0	0	European
Illnesses_of_father_Severe_depression_PMID31427789	Environment	Potential Health Hazards Related to Socioeconomic and Psychosocial Circumstances	Illnesses of father: Severe depression		31427789	355137	12957	342180	European
Illnesses_of_mother_Severe_depression_PMID31427789	Environment	Potential Health Hazards Related to Socioeconomic and Psychosocial Circumstances	Illnesses of mother: Severe depression		31427789	367939	23864	344075	European
Illnesses_of_siblings_Severe_depression_PMID31427789	Environment	Potential Health Hazards Related to Socioeconomic and Psychosocial Circumstances	Illnesses of siblings: Severe depression		31427789	309116	21672	287444	European
Irritability_PMID31427789	Behavior	Irritability	Irritability		31427789	369232	104545	264687	European
Lifetime_number_of_sexual_partners_PMID31427789	Behavior	Sexual Functions	Lifetime number of sexual partners		31427789	316569	0	0	European
Loneliness_isolation_PMID31427789	Behavior	Loneliness	Loneliness, isolation		31427789	380317	68379	311938	European
Longest_period_of_depression_PMID31427789	Clinical	MDD-related	Longest period of depression		31427789	54608	0	0	European
Mania_Ever_had_period_extreme_irritability_PMID31427789	Behavior	Mood	Mania - Ever had period extreme irritability		31427789	122891	32229	90662	European
Mental_distress_Ever_sought_or_received_professional_help_for_mental_distress_PMID31427789	Behavior	Mood	Mental distress - Ever sought or received professional help for mental distress		31427789	126402	49841	76561	European
Mental_distress_Ever_suffered_mental_distress_preventing_usual_activities_PMID31427789	Behavior	Mood	Mental distress - Ever suffered mental distress preventing usual activities		31427789	125147	41785	83362	European
Mental_health_Illness_injury_bereavement_stress_in_last_2_years_Serious_illness_injury_or_assault_to_yourself_PMID31427789	Environment	General Mental Health	Mental health - Illness, injury, bereavement, stress in last 2 years: Serious illness, injury or assault to yourself		31427789	383913	35853	348060	European
Miserableness_PMID31427789	Behavior	Miserableness	Miserableness		31427789	379907	162526	217381	European
Mood_swings_PMID31427789	Behavior	Mood	Mood swings		31427789	377179	170180	206999	European
Nervous_feelings_PMID31427789	Behavior	Anxiety/tension	Nervous feelings		31427789	376368	89149	287219	European
Non_cancer_illness_code_self_reported_depression_PMID31427789	Clinical	MDD-related	Non-cancer illness code, self-reported: depression		31427789	289307	22055	267252	European
Non_cancer_illness_code_self_reported_migraine_PMID31427789	Clinical	Headache	Non-cancer illness code, self-reported: migraine		31427789	289307	11381	277926	European
Number_of_days_week_walked_10_minutes_PMID31427789	Behavior	Looking After One's Health	Number of days/week walked 10+ minutes		31427789	379927	0	0	European
Number_of_depression_episodes_PMID31427789	Clinical	MDD-related	Number of depression episodes		31427789	49205	0	0	European
Number_of_treatments_medications_taken_PMID31427789	Behavior	Looking After One's Health	Number of treatments/medications taken		31427789	386581	0	0	European
Number_of_unsuccessful_stop_smoking_attempts_PMID31427789	Behavior	Tobacco-use	Number of unsuccessful stop-smoking attempts		31427789	86525	0	0	European
Numeric_memory_test_Maximum_digits_remembered_correctly_PMID31427789	Cognition	Memory Functions	Numeric memory test - Maximum digits remembered correctly		31427789	89799	0	0	European
Overall_health_rating_PMID31427789	Behavior	Looking After One's Health	Overall health rating		31427789	384850	0	0	European
Pairs_matching_test_Number_of_correct_matches_in_round_PMID31427789	Cognition	Pairs matching test	Pairs matching test - Number of correct matches in round		31427789	95708	0	0	European
Pairs_matching_test_Number_of_incorrect_matches_in_round_PMID31427789	Cognition	Pairs matching test	Pairs matching test - Number of incorrect matches in round		31427789	95708	0	0	European
Prospective_memory_test_Duration_screen_displayed_PMID31427789	Cognition	Memory Functions	Prospective memory test - Duration screen displayed		31427789	128912	0	0	European
Prospective_memory_test_Number_of_attempts_PMID31427789	Cognition	Memory Functions	Prospective memory test - Number of attempts		31427789	128912	0	0	European
Prospective_memory_test_Time_to_answer_PMID31427789	Cognition	Memory Functions	Prospective memory test - Time to answer		31427789	128912	0	0	European
Reaction_time_test_Mean_time_to_correctly_identify_matches_PMID31427789	Cognition	Reaction Time	Reaction time test - Mean time to correctly identify matches		31427789	383748	0	0	European
Risk_taking_PMID31427789	Behavior	Looking After One's Health	Risk taking		31427789	372651	98694	273957	European
Seen_a_psychiatrist_for_nerves_anxiety_tension_or_depression_PMID31427789	Behavior	Anxiety/tension	Seen a psychiatrist for nerves, anxiety, tension or depression		31427789	384700	44643	340057	European
Seen_doctor_GP_for_nerves_anxiety_tension_or_depression_PMID31427789	Behavior	Anxiety/tension	Seen doctor (GP) for nerves, anxiety, tension or depression		31427789	383771	132032	251739	European
Sensitivity_hurt_feelings_PMID31427789	Behavior	Mood	Sensitivity / hurt feelings		31427789	375272	208508	166764	European
Smoking_status_Never_PMID31427789	Behavior	Tobacco-use	Smoking status: Never		31427789	384964	207939	177025	European
Smoking_status_Previous_vs_Current_PMID31427789	Behavior	Tobacco-use	Smoking status: Previous vs Current		31427789	177025	137139	39886	European
Social_support_Leisure_social_activities_Adult_education_class_PMID31427789	Behavior	Social Interactions	Social support - Leisure/social activities: Adult education class		31427789	385280	28218	357062	European
Social_support_Leisure_social_activities_Other_group_activity_PMID31427789	Behavior	Social Interactions	Social support - Leisure/social activities: Other group activity		31427789	385280	85484	299796	European
Suffer_from_nerves_PMID31427789	Behavior	Anxiety/tension	Suffer from 'nerves'		31427789	372273	79210	293063	European
Symbol_digit_substitution_test_Duration_to_entering_value_PMID31427789	Cognition	Symbol digit substitution test	Symbol digit substitution test - Duration to entering value		31427789	95826	0	0	European
Symbol_digit_substitution_test_Number_of_symbol_digit_matches_attempted_PMID31427789	Cognition	Symbol digit substitution test	Symbol digit substitution test - Number of symbol digit matches attempted		31427789	95669	0	0	European
Symbol_digit_substitution_test_Number_of_symbol_digit_matches_made_correctly_PMID31427789	Cognition	Symbol digit substitution test	Symbol digit substitution test - Number of symbol digit matches made correctly		31427789	95669	0	0	European
Tense_highly_strung_PMID31427789	Behavior	Anxiety/tension	Tense / 'highly strung'		31427789	374129	65738	308391	European
Time_spend_outdoors_in_summer_PMID31427789	Behavior	Looking After One's Health	Time spend outdoors in summer		31427789	350364	0	0	European
Time_spent_outdoors_in_winter_PMID31427789	Behavior	Looking After One's Health	Time spent outdoors in winter		31427789	304316	0	0	European
Time_spent_using_computer_PMID31427789	Behavior	Looking After One's Health	Time spent using computer		31427789	300974	0	0	European
Time_spent_watching_television_TV_PMID31427789	Behavior	Looking After One's Health	Time spent watching television (TV)		31427789	365236	0	0	European
Trail_making_test_Duration_to_complete_alphanumeric_path_trail_2_PMID31427789	Cognition	Trail making test	Trail making test - Duration to complete alphanumeric path (trail #2)		31427789	84259	0	0	European
Trail_making_test_Duration_to_complete_numeric_path_trail_1_PMID31427789	Cognition	Trail making test	Trail making test - Duration to complete numeric path (trail #1)		31427789	84261	0	0	European
Traumatic_events_Avoided_activities_or_situations_because_of_previous_stressful_experience_in_past_month_PMID31427789	Behavior	Traumatic events	Traumatic events - Avoided activities or situations because of previous stressful experience in past month		31427789	126606	0	0	European
Traumatic_events_Been_in_aconfiding_relationship_as_an_adult_PMID31427789	Behavior	Traumatic events	Traumatic events - Been in aconfiding relationship as an adult		31427789	123584	0	0	European
Traumatic_events_Felt_distant_from_other_people_in_past_month_PMID31427789	Behavior	Traumatic events	Traumatic events - Felt distant from other people in past month		31427789	57017	0	0	European
Traumatic_events_Felt_irritable_or_had_angry_outbursts_in_past_month_PMID31427789	Behavior	Traumatic events	Traumatic events - Felt irritable or had angry outbursts in past month		31427789	57010	0	0	European
Traumatic_events_Felt_loved_as_child_PMID31427789	Behavior	Traumatic events	Traumatic events - Felt loved as child		31427789	126348	0	0	European
Traumatic_events_Felt_very_upset_when_reminded_of_stressful_expresince_in_past_month_PMID31427789	Behavior	Traumatic events	Traumatic events - Felt very upset when reminded of stressful expresince in past month		31427789	126627	0	0	European
Traumatic_events_Repeated_disturbing_thoughts_of_stressful_experience_in_past_month_PMID31427789	Behavior	Traumatic events	Traumatic events - Repeated disturbing thoughts of stressful experience in past month		31427789	126635	0	0	European
Types_of_physical_activity_in_last_4_weeks_Heavy_DIY_eg_weeding_lawn_mowing_carpentry_digging_PMID31427789	Behavior	Looking After One's Health	Types of physical activity in last 4 weeks: Heavy DIY (eg: weeding, lawn mowing, carpentry, digging)		31427789	384450	165465	218985	European
Types_of_physical_activity_in_last_4_weeks_Light_DIY_eg_pruning_watering_the_lawn_PMID31427789	Behavior	Looking After One's Health	Types of physical activity in last 4 weeks: Light DIY (eg: pruning, watering the lawn)		31427789	384450	198411	186039	European
Types_of_physical_activity_in_last_4_weeks_Other_exercises_eg_swimming_cycling_keep_fit_bowling_PMID31427789	Behavior	Looking After One's Health	Types of physical activity in last 4 weeks: Other exercises (eg: swimming, cycling, keep fit, bowling)		31427789	384450	186506	197944	European
Types_of_physical_activity_in_last_4_weeks_Walking_for_pleasure_not_as_a_means_of_transport_PMID31427789	Behavior	Looking After One's Health	Types of physical activity in last 4 weeks: Walking for pleasure (not as a means of transport)		31427789	384450	276511	107939	European
Types_of_transport_used_excluding_work_Cycle_PMID31427789	Behavior	Transportation-usage	Types of transport used (excluding work): Cycle		31427789	384551	28201	356350	European
Types_of_transport_used_excluding_work_Public_transport_PMID31427789	Behavior	Transportation-usage	Types of transport used (excluding work): Public transport		31427789	384551	116376	268175	European
Types_of_transport_used_excluding_work_Walk_PMID31427789	Behavior	Transportation-usage	Types of transport used (excluding work): Walk		31427789	384551	189568	194983	European
Use_of_sun_uv_protection_PMID31427789	Behavior	Looking After One's Health	Use of sun/uv protection		31427789	383659	0	0	European
Worrier_anxious_feelings_PMID31427789	Behavior	Anxiety/tension	Worrier / anxious feelings		31427789	376411	213808	162603	European
Worry_too_long_after_embarrassment_PMID31427789	Behavior	Anxiety/tension	Worry too long after embarrassment		31427789	370660	176905	193755	European
Panic_disorder_PMID31712720	Clinical	Panic disorder	Panic disorder		31712720	10240	2248	7992	European
Canabis_use_disorder_PMID33096046	Clinical	Cannabis use disorder	Cannabis use disorder		33096046	384032	20916	363116	European
ADHD_Disruptive_behavior_PMID33495439	Behavior	ADHD	ADHD Disruptive behavior		33495439	35107	3802	31305	European
AmygNuclei_lh_volume_Accessory_Basal_nucleus_PMID33875891	Brain MRI	Regional and tissue volume	Volume of Accessory-Basal-nucleus in the left hemisphere generated by subcortical volumetric sub-segmentation of the Amygdala Nuclei	Accessory-Basal-nucleus	33875891	31968	0	0	European
AmygNuclei_lh_volume_Anterior_amygdaloid_area_AAA_PMID33875891	Brain MRI	Regional and tissue volume	Volume of Anterior-amygdaloid-area-AAA in the left hemisphere generated by subcortical volumetric sub-segmentation of the Amygdala Nuclei	Anterior-amygdaloid-area-AAA	33875891	31968	0	0	European
AmygNuclei_lh_volume_Basal_nucleus_PMID33875891	Brain MRI	Regional and tissue volume	Volume of Basal-nucleus in the left hemisphere generated by subcortical volumetric sub-segmentation of the Amygdala Nuclei	Basal-nucleus	33875891	31968	0	0	European
AmygNuclei_lh_volume_Central_nucleus_PMID33875891	Brain MRI	Regional and tissue volume	Volume of Central-nucleus in the left hemisphere generated by subcortical volumetric sub-segmentation of the Amygdala Nuclei	Central-nucleus	33875891	31968	0	0	European
AmygNuclei_lh_volume_Cortical_nucleus_PMID33875891	Brain MRI	Regional and tissue volume	Volume of Cortical-nucleus in the left hemisphere generated by subcortical volumetric sub-segmentation of the Amygdala Nuclei	Cortical-nucleus	33875891	31968	0	0	European
AmygNuclei_lh_volume_Corticoamygdaloid_transitio_PMID33875891	Brain MRI	Regional and tissue volume	Volume of Corticoamygdaloid-transitio in the left hemisphere generated by subcortical volumetric sub-segmentation of the Amygdala Nuclei	Corticoamygdaloid-transitio	33875891	31968	0	0	European
AmygNuclei_lh_volume_Lateral_nucleus_PMID33875891	Brain MRI	Regional and tissue volume	Volume of Lateral-nucleus in the left hemisphere generated by subcortical volumetric sub-segmentation of the Amygdala Nuclei	Lateral-nucleus	33875891	31968	0	0	European
AmygNuclei_lh_volume_Medial_nucleus_PMID33875891	Brain MRI	Regional and tissue volume	Volume of Medial-nucleus in the left hemisphere generated by subcortical volumetric sub-segmentation of the Amygdala Nuclei	Medial-nucleus	33875891	31968	0	0	European
AmygNuclei_lh_volume_Paralaminar_nucleus_PMID33875891	Brain MRI	Regional and tissue volume	Volume of Paralaminar-nucleus in the left hemisphere generated by subcortical volumetric sub-segmentation of the Amygdala Nuclei	Paralaminar-nucleus	33875891	31968	0	0	European
AmygNuclei_lh_volume_Whole_amygdala_PMID33875891	Brain MRI	Regional and tissue volume	Volume of Whole-amygdala in the left hemisphere generated by subcortical volumetric sub-segmentation of the Amygdala Nuclei	Whole-Amygdala	33875891	31968	0	0	European
AmygNuclei_rh_volume_Accessory_Basal_nucleus_PMID33875891	Brain MRI	Regional and tissue volume	Volume of Accessory-Basal-nucleus in the right hemisphere generated by subcortical volumetric sub-segmentation of the Amygdala Nuclei	Accessory-Basal-nucleus	33875891	31968	0	0	European
AmygNuclei_rh_volume_Anterior_amygdaloid_area_AAA_PMID33875891	Brain MRI	Regional and tissue volume	Volume of Anterior-amygdaloid-area-AAA in the right hemisphere generated by subcortical volumetric sub-segmentation of the Amygdala Nuclei	Anterior-amygdaloid-area-AAA	33875891	31968	0	0	European
AmygNuclei_rh_volume_Basal_nucleus_PMID33875891	Brain MRI	Regional and tissue volume	Volume of Basal-nucleus in the right hemisphere generated by subcortical volumetric sub-segmentation of the Amygdala Nuclei	Basal-nucleus	33875891	31968	0	0	European
AmygNuclei_rh_volume_Central_nucleus_PMID33875891	Brain MRI	Regional and tissue volume	Volume of Central-nucleus in the right hemisphere generated by subcortical volumetric sub-segmentation of the Amygdala Nuclei	Central-nucleus	33875891	31968	0	0	European
AmygNuclei_rh_volume_Cortical_nucleus_PMID33875891	Brain MRI	Regional and tissue volume	Volume of Cortical-nucleus in the right hemisphere generated by subcortical volumetric sub-segmentation of the Amygdala Nuclei	Cortical-nucleus	33875891	31968	0	0	European
AmygNuclei_rh_volume_Corticoamygdaloid_transitio_PMID33875891	Brain MRI	Regional and tissue volume	Volume of Corticoamygdaloid-transitio in the right hemisphere generated by subcortical volumetric sub-segmentation of the Amygdala Nuclei	Corticoamygdaloid-transitio	33875891	31968	0	0	European
AmygNuclei_rh_volume_Lateral_nucleus_PMID33875891	Brain MRI	Regional and tissue volume	Volume of Lateral-nucleus in the right hemisphere generated by subcortical volumetric sub-segmentation of the Amygdala Nuclei	Lateral-nucleus	33875891	31968	0	0	European
AmygNuclei_rh_volume_Medial_nucleus_PMID33875891	Brain MRI	Regional and tissue volume	Volume of Medial-nucleus in the right hemisphere generated by subcortical volumetric sub-segmentation of the Amygdala Nuclei	Medial-nucleus	33875891	31968	0	0	European
AmygNuclei_rh_volume_Paralaminar_nucleus_PMID33875891	Brain MRI	Regional and tissue volume	Volume of Paralaminar-nucleus in the right hemisphere generated by subcortical volumetric sub-segmentation of the Amygdala Nuclei	Paralaminar-nucleus	33875891	31968	0	0	European
AmygNuclei_rh_volume_Whole_amygdala_PMID33875891	Brain MRI	Regional and tissue volume	Volume of Whole-amygdala in the right hemisphere generated by subcortical volumetric sub-segmentation of the Amygdala Nuclei	Whole-Amygdala	33875891	31968	0	0	European
aparc_DKTatlas_lh_area_caudalanteriorcingulate_PMID33875891	Brain MRI	Cortical area	Area of caudalanteriorcingulate in the left hemisphere generated by parcellation of the white surface using DKT parcellation	CaudalanteriorCingulate	33875891	31967	0	0	European
aparc_DKTatlas_lh_area_caudalmiddlefrontal_PMID33875891	Brain MRI	Cortical area	Area of caudalmiddlefrontal in the left hemisphere generated by parcellation of the white surface using DKT parcellation	Caudalmiddlefrontal	33875891	31968	0	0	European
aparc_DKTatlas_lh_area_cuneus_PMID33875891	Brain MRI	Cortical area	Area of cuneus in the left hemisphere generated by parcellation of the white surface using DKT parcellation	Cuneus	33875891	31968	0	0	European
aparc_DKTatlas_lh_area_entorhinal_PMID33875891	Brain MRI	Cortical area	Area of entorhinal in the left hemisphere generated by parcellation of the white surface using DKT parcellation	Entorhinal	33875891	31967	0	0	European
aparc_DKTatlas_lh_area_fusiform_PMID33875891	Brain MRI	Cortical area	Area of fusiform in the left hemisphere generated by parcellation of the white surface using DKT parcellation	Fusiform	33875891	31968	0	0	European
aparc_DKTatlas_lh_area_inferiorparietal_PMID33875891	Brain MRI	Cortical area	Area of inferiorparietal in the left hemisphere generated by parcellation of the white surface using DKT parcellation	Inferiorparietal	33875891	31968	0	0	European
aparc_DKTatlas_lh_area_inferiortemporal_PMID33875891	Brain MRI	Cortical area	Area of inferiortemporal in the left hemisphere generated by parcellation of the white surface using DKT parcellation	Inferiortemporal	33875891	31968	0	0	European
aparc_DKTatlas_lh_area_insula_PMID33875891	Brain MRI	Cortical area	Area of insula in the left hemisphere generated by parcellation of the white surface using DKT parcellation	Insula	33875891	31968	0	0	European
aparc_DKTatlas_lh_area_isthmuscingulate_PMID33875891	Brain MRI	Cortical area	Area of isthmuscingulate in the left hemisphere generated by parcellation of the white surface using DKT parcellation	IsthmusCingulate	33875891	31968	0	0	European
aparc_DKTatlas_lh_area_lateraloccipital_PMID33875891	Brain MRI	Cortical area	Area of lateraloccipital in the left hemisphere generated by parcellation of the white surface using DKT parcellation	Lateraloccipital	33875891	31968	0	0	European
aparc_DKTatlas_lh_area_lateralorbitofrontal_PMID33875891	Brain MRI	Cortical area	Area of lateralorbitofrontal in the left hemisphere generated by parcellation of the white surface using DKT parcellation	Lateralorbitofrontal	33875891	31968	0	0	European
aparc_DKTatlas_lh_area_lingual_PMID33875891	Brain MRI	Cortical area	Area of lingual in the left hemisphere generated by parcellation of the white surface using DKT parcellation	Lingual	33875891	31968	0	0	European
aparc_DKTatlas_lh_area_medialorbitofrontal_PMID33875891	Brain MRI	Cortical area	Area of medialorbitofrontal in the left hemisphere generated by parcellation of the white surface using DKT parcellation	Medialorbitofrontal	33875891	31968	0	0	European
aparc_DKTatlas_lh_area_middletemporal_PMID33875891	Brain MRI	Cortical area	Area of middletemporal in the left hemisphere generated by parcellation of the white surface using DKT parcellation	Middletemporal	33875891	31968	0	0	European
aparc_DKTatlas_lh_area_paracentral_PMID33875891	Brain MRI	Cortical area	Area of paracentral in the left hemisphere generated by parcellation of the white surface using DKT parcellation	Paracentral	33875891	31968	0	0	European
aparc_DKTatlas_lh_area_parahippocampal_PMID33875891	Brain MRI	Cortical area	Area of parahippocampal in the left hemisphere generated by parcellation of the white surface using DKT parcellation	ParaHippocampal	33875891	31968	0	0	European
aparc_DKTatlas_lh_area_parsopercularis_PMID33875891	Brain MRI	Cortical area	Area of parsopercularis in the left hemisphere generated by parcellation of the white surface using DKT parcellation	Parsopercularis	33875891	31968	0	0	European
aparc_DKTatlas_lh_area_parsorbitalis_PMID33875891	Brain MRI	Cortical area	Area of parsorbitalis in the left hemisphere generated by parcellation of the white surface using DKT parcellation	Parsorbitalis	33875891	31967	0	0	European
aparc_DKTatlas_lh_area_parstriangularis_PMID33875891	Brain MRI	Cortical area	Area of parstriangularis in the left hemisphere generated by parcellation of the white surface using DKT parcellation	Parstriangularis	33875891	31968	0	0	European
aparc_DKTatlas_lh_area_pericalcarine_PMID33875891	Brain MRI	Cortical area	Area of pericalcarine in the left hemisphere generated by parcellation of the white surface using DKT parcellation	Pericalcarine	33875891	31968	0	0	European
aparc_DKTatlas_lh_area_postcentral_PMID33875891	Brain MRI	Cortical area	Area of postcentral in the left hemisphere generated by parcellation of the white surface using DKT parcellation	Postcentral	33875891	31968	0	0	European
aparc_DKTatlas_lh_area_posteriorcingulate_PMID33875891	Brain MRI	Cortical area	Area of posteriorcingulate in the left hemisphere generated by parcellation of the white surface using DKT parcellation	PosteriorCingulate	33875891	31967	0	0	European
aparc_DKTatlas_lh_area_precentral_PMID33875891	Brain MRI	Cortical area	Area of precentral in the left hemisphere generated by parcellation of the white surface using DKT parcellation	Precentral	33875891	31968	0	0	European
aparc_DKTatlas_lh_area_precuneus_PMID33875891	Brain MRI	Cortical area	Area of precuneus in the left hemisphere generated by parcellation of the white surface using DKT parcellation	preCuneus	33875891	31968	0	0	European
aparc_DKTatlas_lh_area_rostralanteriorcingulate_PMID33875891	Brain MRI	Cortical area	Area of rostralanteriorcingulate in the left hemisphere generated by parcellation of the white surface using DKT parcellation	RostralanteriorCingulate	33875891	31968	0	0	European
aparc_DKTatlas_lh_area_rostralmiddlefrontal_PMID33875891	Brain MRI	Cortical area	Area of rostralmiddlefrontal in the left hemisphere generated by parcellation of the white surface using DKT parcellation	Rostralmiddlefrontal	33875891	31968	0	0	European
aparc_DKTatlas_lh_area_superiorfrontal_PMID33875891	Brain MRI	Cortical area	Area of superiorfrontal in the left hemisphere generated by parcellation of the white surface using DKT parcellation	Superiorfrontal	33875891	31968	0	0	European
aparc_DKTatlas_lh_area_superiorparietal_PMID33875891	Brain MRI	Cortical area	Area of superiorparietal in the left hemisphere generated by parcellation of the white surface using DKT parcellation	Superiorparietal	33875891	31968	0	0	European
aparc_DKTatlas_lh_area_superiortemporal_PMID33875891	Brain MRI	Cortical area	Area of superiortemporal in the left hemisphere generated by parcellation of the white surface using DKT parcellation	Superiortemporal	33875891	31968	0	0	European
aparc_DKTatlas_lh_area_supramarginal_PMID33875891	Brain MRI	Cortical area	Area of supramarginal in the left hemisphere generated by parcellation of the white surface using DKT parcellation	Supramarginal	33875891	31968	0	0	European
aparc_DKTatlas_lh_area_transversetemporal_PMID33875891	Brain MRI	Cortical area	Area of transversetemporal in the left hemisphere generated by parcellation of the white surface using DKT parcellation	Transversetemporal	33875891	31968	0	0	European
aparc_DKTatlas_lh_thickness_caudalanteriorcingulate_PMID33875891	Brain MRI	Cortical thickness	Mean thickness of caudalanteriorcingulate in the left hemisphere generated by parcellation of the white surface using DKT parcellation	CaudalanteriorCingulate	33875891	31967	0	0	European
aparc_DKTatlas_lh_thickness_caudalmiddlefrontal_PMID33875891	Brain MRI	Cortical thickness	Mean thickness of caudalmiddlefrontal in the left hemisphere generated by parcellation of the white surface using DKT parcellation	Caudalmiddlefrontal	33875891	31968	0	0	European
aparc_DKTatlas_lh_thickness_cuneus_PMID33875891	Brain MRI	Cortical thickness	Mean thickness of cuneus in the left hemisphere generated by parcellation of the white surface using DKT parcellation	Cuneus	33875891	31968	0	0	European
aparc_DKTatlas_lh_thickness_entorhinal_PMID33875891	Brain MRI	Cortical thickness	Mean thickness of entorhinal in the left hemisphere generated by parcellation of the white surface using DKT parcellation	Entorhinal	33875891	31967	0	0	European
aparc_DKTatlas_lh_thickness_fusiform_PMID33875891	Brain MRI	Cortical thickness	Mean thickness of fusiform in the left hemisphere generated by parcellation of the white surface using DKT parcellation	Fusiform	33875891	31968	0	0	European
aparc_DKTatlas_lh_thickness_inferiorparietal_PMID33875891	Brain MRI	Cortical thickness	Mean thickness of inferiorparietal in the left hemisphere generated by parcellation of the white surface using DKT parcellation	Inferiorparietal	33875891	31968	0	0	European
aparc_DKTatlas_lh_thickness_inferiortemporal_PMID33875891	Brain MRI	Cortical thickness	Mean thickness of inferiortemporal in the left hemisphere generated by parcellation of the white surface using DKT parcellation	Inferiortemporal	33875891	31968	0	0	European
aparc_DKTatlas_lh_thickness_insula_PMID33875891	Brain MRI	Cortical thickness	Mean thickness of insula in the left hemisphere generated by parcellation of the white surface using DKT parcellation	Insula	33875891	31968	0	0	European
aparc_DKTatlas_lh_thickness_isthmuscingulate_PMID33875891	Brain MRI	Cortical thickness	Mean thickness of isthmuscingulate in the left hemisphere generated by parcellation of the white surface using DKT parcellation	IsthmusCingulate	33875891	31968	0	0	European
aparc_DKTatlas_lh_thickness_lateraloccipital_PMID33875891	Brain MRI	Cortical thickness	Mean thickness of lateraloccipital in the left hemisphere generated by parcellation of the white surface using DKT parcellation	Lateraloccipital	33875891	31968	0	0	European
aparc_DKTatlas_lh_thickness_lateralorbitofrontal_PMID33875891	Brain MRI	Cortical thickness	Mean thickness of lateralorbitofrontal in the left hemisphere generated by parcellation of the white surface using DKT parcellation	Lateralorbitofrontal	33875891	31968	0	0	European
aparc_DKTatlas_lh_thickness_lingual_PMID33875891	Brain MRI	Cortical thickness	Mean thickness of lingual in the left hemisphere generated by parcellation of the white surface using DKT parcellation	Lingual	33875891	31968	0	0	European
aparc_DKTatlas_lh_thickness_medialorbitofrontal_PMID33875891	Brain MRI	Cortical thickness	Mean thickness of medialorbitofrontal in the left hemisphere generated by parcellation of the white surface using DKT parcellation	Medialorbitofrontal	33875891	31968	0	0	European
aparc_DKTatlas_lh_thickness_middletemporal_PMID33875891	Brain MRI	Cortical thickness	Mean thickness of middletemporal in the left hemisphere generated by parcellation of the white surface using DKT parcellation	Middletemporal	33875891	31968	0	0	European
aparc_DKTatlas_lh_thickness_paracentral_PMID33875891	Brain MRI	Cortical thickness	Mean thickness of paracentral in the left hemisphere generated by parcellation of the white surface using DKT parcellation	Paracentral	33875891	31968	0	0	European
aparc_DKTatlas_lh_thickness_parahippocampal_PMID33875891	Brain MRI	Cortical thickness	Mean thickness of parahippocampal in the left hemisphere generated by parcellation of the white surface using DKT parcellation	ParaHippocampal	33875891	31968	0	0	European
aparc_DKTatlas_lh_thickness_parsopercularis_PMID33875891	Brain MRI	Cortical thickness	Mean thickness of parsopercularis in the left hemisphere generated by parcellation of the white surface using DKT parcellation	Parsopercularis	33875891	31968	0	0	European
aparc_DKTatlas_lh_thickness_parsorbitalis_PMID33875891	Brain MRI	Cortical thickness	Mean thickness of parsorbitalis in the left hemisphere generated by parcellation of the white surface using DKT parcellation	Parsorbitalis	33875891	31967	0	0	European
aparc_DKTatlas_lh_thickness_parstriangularis_PMID33875891	Brain MRI	Cortical thickness	Mean thickness of parstriangularis in the left hemisphere generated by parcellation of the white surface using DKT parcellation	Parstriangularis	33875891	31968	0	0	European
aparc_DKTatlas_lh_thickness_pericalcarine_PMID33875891	Brain MRI	Cortical thickness	Mean thickness of pericalcarine in the left hemisphere generated by parcellation of the white surface using DKT parcellation	Pericalcarine	33875891	31968	0	0	European
aparc_DKTatlas_lh_thickness_postcentral_PMID33875891	Brain MRI	Cortical thickness	Mean thickness of postcentral in the left hemisphere generated by parcellation of the white surface using DKT parcellation	Postcentral	33875891	31968	0	0	European
aparc_DKTatlas_lh_thickness_posteriorcingulate_PMID33875891	Brain MRI	Cortical thickness	Mean thickness of posteriorcingulate in the left hemisphere generated by parcellation of the white surface using DKT parcellation	PosteriorCingulate	33875891	31967	0	0	European
aparc_DKTatlas_lh_thickness_precentral_PMID33875891	Brain MRI	Cortical thickness	Mean thickness of precentral in the left hemisphere generated by parcellation of the white surface using DKT parcellation	Precentral	33875891	31968	0	0	European
aparc_DKTatlas_lh_thickness_precuneus_PMID33875891	Brain MRI	Cortical thickness	Mean thickness of precuneus in the left hemisphere generated by parcellation of the white surface using DKT parcellation	preCuneus	33875891	31968	0	0	European
aparc_DKTatlas_lh_thickness_rostralanteriorcingulate_PMID33875891	Brain MRI	Cortical thickness	Mean thickness of rostralanteriorcingulate in the left hemisphere generated by parcellation of the white surface using DKT parcellation	RostralanteriorCingulate	33875891	31968	0	0	European
aparc_DKTatlas_lh_thickness_rostralmiddlefrontal_PMID33875891	Brain MRI	Cortical thickness	Mean thickness of rostralmiddlefrontal in the left hemisphere generated by parcellation of the white surface using DKT parcellation	Rostralmiddlefrontal	33875891	31968	0	0	European
aparc_DKTatlas_lh_thickness_superiorfrontal_PMID33875891	Brain MRI	Cortical thickness	Mean thickness of superiorfrontal in the left hemisphere generated by parcellation of the white surface using DKT parcellation	Superiorfrontal	33875891	31968	0	0	European
aparc_DKTatlas_lh_thickness_superiorparietal_PMID33875891	Brain MRI	Cortical thickness	Mean thickness of superiorparietal in the left hemisphere generated by parcellation of the white surface using DKT parcellation	Superiorparietal	33875891	31968	0	0	European
aparc_DKTatlas_lh_thickness_superiortemporal_PMID33875891	Brain MRI	Cortical thickness	Mean thickness of superiortemporal in the left hemisphere generated by parcellation of the white surface using DKT parcellation	Superiortemporal	33875891	31968	0	0	European
aparc_DKTatlas_lh_thickness_supramarginal_PMID33875891	Brain MRI	Cortical thickness	Mean thickness of supramarginal in the left hemisphere generated by parcellation of the white surface using DKT parcellation	Supramarginal	33875891	31968	0	0	European
aparc_DKTatlas_lh_thickness_transversetemporal_PMID33875891	Brain MRI	Cortical thickness	Mean thickness of transversetemporal in the left hemisphere generated by parcellation of the white surface using DKT parcellation	Transversetemporal	33875891	31968	0	0	European
aparc_DKTatlas_lh_volume_caudalanteriorcingulate_PMID33875891	Brain MRI	Regional and tissue volume	Volume of caudalanteriorcingulate in the left hemisphere generated by parcellation of the white surface using DKT parcellation	CaudalanteriorCingulate	33875891	31967	0	0	European
aparc_DKTatlas_lh_volume_caudalmiddlefrontal_PMID33875891	Brain MRI	Regional and tissue volume	Volume of caudalmiddlefrontal in the left hemisphere generated by parcellation of the white surface using DKT parcellation	Caudalmiddlefrontal	33875891	31968	0	0	European
aparc_DKTatlas_lh_volume_cuneus_PMID33875891	Brain MRI	Regional and tissue volume	Volume of cuneus in the left hemisphere generated by parcellation of the white surface using DKT parcellation	Cuneus	33875891	31968	0	0	European
aparc_DKTatlas_lh_volume_entorhinal_PMID33875891	Brain MRI	Regional and tissue volume	Volume of entorhinal in the left hemisphere generated by parcellation of the white surface using DKT parcellation	Entorhinal	33875891	31967	0	0	European
aparc_DKTatlas_lh_volume_fusiform_PMID33875891	Brain MRI	Regional and tissue volume	Volume of fusiform in the left hemisphere generated by parcellation of the white surface using DKT parcellation	Fusiform	33875891	31968	0	0	European
aparc_DKTatlas_lh_volume_inferiorparietal_PMID33875891	Brain MRI	Regional and tissue volume	Volume of inferiorparietal in the left hemisphere generated by parcellation of the white surface using DKT parcellation	Inferiorparietal	33875891	31968	0	0	European
aparc_DKTatlas_lh_volume_inferiortemporal_PMID33875891	Brain MRI	Regional and tissue volume	Volume of inferiortemporal in the left hemisphere generated by parcellation of the white surface using DKT parcellation	Inferiortemporal	33875891	31968	0	0	European
aparc_DKTatlas_lh_volume_insula_PMID33875891	Brain MRI	Regional and tissue volume	Volume of insula in the left hemisphere generated by parcellation of the white surface using DKT parcellation	Insula	33875891	31968	0	0	European
aparc_DKTatlas_lh_volume_isthmuscingulate_PMID33875891	Brain MRI	Regional and tissue volume	Volume of isthmuscingulate in the left hemisphere generated by parcellation of the white surface using DKT parcellation	IsthmusCingulate	33875891	31968	0	0	European
aparc_DKTatlas_lh_volume_lateraloccipital_PMID33875891	Brain MRI	Regional and tissue volume	Volume of lateraloccipital in the left hemisphere generated by parcellation of the white surface using DKT parcellation	Lateraloccipital	33875891	31968	0	0	European
aparc_DKTatlas_lh_volume_lateralorbitofrontal_PMID33875891	Brain MRI	Regional and tissue volume	Volume of lateralorbitofrontal in the left hemisphere generated by parcellation of the white surface using DKT parcellation	Lateralorbitofrontal	33875891	31968	0	0	European
aparc_DKTatlas_lh_volume_lingual_PMID33875891	Brain MRI	Regional and tissue volume	Volume of lingual in the left hemisphere generated by parcellation of the white surface using DKT parcellation	Lingual	33875891	31968	0	0	European
aparc_DKTatlas_lh_volume_medialorbitofrontal_PMID33875891	Brain MRI	Regional and tissue volume	Volume of medialorbitofrontal in the left hemisphere generated by parcellation of the white surface using DKT parcellation	Medialorbitofrontal	33875891	31968	0	0	European
aparc_DKTatlas_lh_volume_middletemporal_PMID33875891	Brain MRI	Regional and tissue volume	Volume of middletemporal in the left hemisphere generated by parcellation of the white surface using DKT parcellation	Middletemporal	33875891	31968	0	0	European
aparc_DKTatlas_lh_volume_paracentral_PMID33875891	Brain MRI	Regional and tissue volume	Volume of paracentral in the left hemisphere generated by parcellation of the white surface using DKT parcellation	Paracentral	33875891	31968	0	0	European
aparc_DKTatlas_lh_volume_parahippocampal_PMID33875891	Brain MRI	Regional and tissue volume	Volume of parahippocampal in the left hemisphere generated by parcellation of the white surface using DKT parcellation	ParaHippocampal	33875891	31968	0	0	European
aparc_DKTatlas_lh_volume_parsopercularis_PMID33875891	Brain MRI	Regional and tissue volume	Volume of parsopercularis in the left hemisphere generated by parcellation of the white surface using DKT parcellation	Parsopercularis	33875891	31968	0	0	European
aparc_DKTatlas_lh_volume_parsorbitalis_PMID33875891	Brain MRI	Regional and tissue volume	Volume of parsorbitalis in the left hemisphere generated by parcellation of the white surface using DKT parcellation	Parsorbitalis	33875891	31967	0	0	European
aparc_DKTatlas_lh_volume_parstriangularis_PMID33875891	Brain MRI	Regional and tissue volume	Volume of parstriangularis in the left hemisphere generated by parcellation of the white surface using DKT parcellation	Parstriangularis	33875891	31968	0	0	European
aparc_DKTatlas_lh_volume_pericalcarine_PMID33875891	Brain MRI	Regional and tissue volume	Volume of pericalcarine in the left hemisphere generated by parcellation of the white surface using DKT parcellation	Pericalcarine	33875891	31968	0	0	European
aparc_DKTatlas_lh_volume_postcentral_PMID33875891	Brain MRI	Regional and tissue volume	Volume of postcentral in the left hemisphere generated by parcellation of the white surface using DKT parcellation	Postcentral	33875891	31968	0	0	European
aparc_DKTatlas_lh_volume_posteriorcingulate_PMID33875891	Brain MRI	Regional and tissue volume	Volume of posteriorcingulate in the left hemisphere generated by parcellation of the white surface using DKT parcellation	PosteriorCingulate	33875891	31967	0	0	European
aparc_DKTatlas_lh_volume_precentral_PMID33875891	Brain MRI	Regional and tissue volume	Volume of precentral in the left hemisphere generated by parcellation of the white surface using DKT parcellation	Precentral	33875891	31968	0	0	European
aparc_DKTatlas_lh_volume_precuneus_PMID33875891	Brain MRI	Regional and tissue volume	Volume of precuneus in the left hemisphere generated by parcellation of the white surface using DKT parcellation	preCuneus	33875891	31968	0	0	European
aparc_DKTatlas_lh_volume_rostralanteriorcingulate_PMID33875891	Brain MRI	Regional and tissue volume	Volume of rostralanteriorcingulate in the left hemisphere generated by parcellation of the white surface using DKT parcellation	RostralanteriorCingulate	33875891	31968	0	0	European
aparc_DKTatlas_lh_volume_rostralmiddlefrontal_PMID33875891	Brain MRI	Regional and tissue volume	Volume of rostralmiddlefrontal in the left hemisphere generated by parcellation of the white surface using DKT parcellation	Rostralmiddlefrontal	33875891	31968	0	0	European
aparc_DKTatlas_lh_volume_superiorfrontal_PMID33875891	Brain MRI	Regional and tissue volume	Volume of superiorfrontal in the left hemisphere generated by parcellation of the white surface using DKT parcellation	Superiorfrontal	33875891	31968	0	0	European
aparc_DKTatlas_lh_volume_superiorparietal_PMID33875891	Brain MRI	Regional and tissue volume	Volume of superiorparietal in the left hemisphere generated by parcellation of the white surface using DKT parcellation	Superiorparietal	33875891	31968	0	0	European
aparc_DKTatlas_lh_volume_superiortemporal_PMID33875891	Brain MRI	Regional and tissue volume	Volume of superiortemporal in the left hemisphere generated by parcellation of the white surface using DKT parcellation	Superiortemporal	33875891	31968	0	0	European
aparc_DKTatlas_lh_volume_supramarginal_PMID33875891	Brain MRI	Regional and tissue volume	Volume of supramarginal in the left hemisphere generated by parcellation of the white surface using DKT parcellation	Supramarginal	33875891	31968	0	0	European
aparc_DKTatlas_lh_volume_transversetemporal_PMID33875891	Brain MRI	Regional and tissue volume	Volume of transversetemporal in the left hemisphere generated by parcellation of the white surface using DKT parcellation	Transversetemporal	33875891	31968	0	0	European
aparc_DKTatlas_rh_area_caudalanteriorcingulate_PMID33875891	Brain MRI	Cortical area	Area of caudalanteriorcingulate in the right hemisphere generated by parcellation of the white surface using DKT parcellation	CaudalanteriorCingulate	33875891	31966	0	0	European
aparc_DKTatlas_rh_area_caudalmiddlefrontal_PMID33875891	Brain MRI	Cortical area	Area of caudalmiddlefrontal in the right hemisphere generated by parcellation of the white surface using DKT parcellation	Caudalmiddlefrontal	33875891	31968	0	0	European
aparc_DKTatlas_rh_area_cuneus_PMID33875891	Brain MRI	Cortical area	Area of cuneus in the right hemisphere generated by parcellation of the white surface using DKT parcellation	Cuneus	33875891	31968	0	0	European
aparc_DKTatlas_rh_area_entorhinal_PMID33875891	Brain MRI	Cortical area	Area of entorhinal in the right hemisphere generated by parcellation of the white surface using DKT parcellation	Entorhinal	33875891	31968	0	0	European
aparc_DKTatlas_rh_area_fusiform_PMID33875891	Brain MRI	Cortical area	Area of fusiform in the right hemisphere generated by parcellation of the white surface using DKT parcellation	Fusiform	33875891	31968	0	0	European
aparc_DKTatlas_rh_area_inferiorparietal_PMID33875891	Brain MRI	Cortical area	Area of inferiorparietal in the right hemisphere generated by parcellation of the white surface using DKT parcellation	Inferiorparietal	33875891	31968	0	0	European
aparc_DKTatlas_rh_area_inferiortemporal_PMID33875891	Brain MRI	Cortical area	Area of inferiortemporal in the right hemisphere generated by parcellation of the white surface using DKT parcellation	Inferiortemporal	33875891	31968	0	0	European
aparc_DKTatlas_rh_area_insula_PMID33875891	Brain MRI	Cortical area	Area of insula in the right hemisphere generated by parcellation of the white surface using DKT parcellation	Insula	33875891	31968	0	0	European
aparc_DKTatlas_rh_area_isthmuscingulate_PMID33875891	Brain MRI	Cortical area	Area of isthmuscingulate in the right hemisphere generated by parcellation of the white surface using DKT parcellation	IsthmusCingulate	33875891	31968	0	0	European
aparc_DKTatlas_rh_area_lateraloccipital_PMID33875891	Brain MRI	Cortical area	Area of lateraloccipital in the right hemisphere generated by parcellation of the white surface using DKT parcellation	Lateraloccipital	33875891	31968	0	0	European
aparc_DKTatlas_rh_area_lateralorbitofrontal_PMID33875891	Brain MRI	Cortical area	Area of lateralorbitofrontal in the right hemisphere generated by parcellation of the white surface using DKT parcellation	Lateralorbitofrontal	33875891	31968	0	0	European
aparc_DKTatlas_rh_area_lingual_PMID33875891	Brain MRI	Cortical area	Area of lingual in the right hemisphere generated by parcellation of the white surface using DKT parcellation	Lingual	33875891	31968	0	0	European
aparc_DKTatlas_rh_area_medialorbitofrontal_PMID33875891	Brain MRI	Cortical area	Area of medialorbitofrontal in the right hemisphere generated by parcellation of the white surface using DKT parcellation	Medialorbitofrontal	33875891	31968	0	0	European
aparc_DKTatlas_rh_area_middletemporal_PMID33875891	Brain MRI	Cortical area	Area of middletemporal in the right hemisphere generated by parcellation of the white surface using DKT parcellation	Middletemporal	33875891	31968	0	0	European
aparc_DKTatlas_rh_area_paracentral_PMID33875891	Brain MRI	Cortical area	Area of paracentral in the right hemisphere generated by parcellation of the white surface using DKT parcellation	Paracentral	33875891	31968	0	0	European
aparc_DKTatlas_rh_area_parahippocampal_PMID33875891	Brain MRI	Cortical area	Area of parahippocampal in the right hemisphere generated by parcellation of the white surface using DKT parcellation	ParaHippocampal	33875891	31968	0	0	European
aparc_DKTatlas_rh_area_parsopercularis_PMID33875891	Brain MRI	Cortical area	Area of parsopercularis in the right hemisphere generated by parcellation of the white surface using DKT parcellation	Parsopercularis	33875891	31968	0	0	European
aparc_DKTatlas_rh_area_parsorbitalis_PMID33875891	Brain MRI	Cortical area	Area of parsorbitalis in the right hemisphere generated by parcellation of the white surface using DKT parcellation	Parsorbitalis	33875891	31966	0	0	European
aparc_DKTatlas_rh_area_parstriangularis_PMID33875891	Brain MRI	Cortical area	Area of parstriangularis in the right hemisphere generated by parcellation of the white surface using DKT parcellation	Parstriangularis	33875891	31967	0	0	European
aparc_DKTatlas_rh_area_pericalcarine_PMID33875891	Brain MRI	Cortical area	Area of pericalcarine in the right hemisphere generated by parcellation of the white surface using DKT parcellation	Pericalcarine	33875891	31968	0	0	European
aparc_DKTatlas_rh_area_postcentral_PMID33875891	Brain MRI	Cortical area	Area of postcentral in the right hemisphere generated by parcellation of the white surface using DKT parcellation	Postcentral	33875891	31968	0	0	European
aparc_DKTatlas_rh_area_posteriorcingulate_PMID33875891	Brain MRI	Cortical area	Area of posteriorcingulate in the right hemisphere generated by parcellation of the white surface using DKT parcellation	PosteriorCingulate	33875891	31968	0	0	European
aparc_DKTatlas_rh_area_precentral_PMID33875891	Brain MRI	Cortical area	Area of precentral in the right hemisphere generated by parcellation of the white surface using DKT parcellation	Precentral	33875891	31968	0	0	European
aparc_DKTatlas_rh_area_precuneus_PMID33875891	Brain MRI	Cortical area	Area of precuneus in the right hemisphere generated by parcellation of the white surface using DKT parcellation	preCuneus	33875891	31968	0	0	European
aparc_DKTatlas_rh_area_rostralanteriorcingulate_PMID33875891	Brain MRI	Cortical area	Area of rostralanteriorcingulate in the right hemisphere generated by parcellation of the white surface using DKT parcellation	RostralanteriorCingulate	33875891	31967	0	0	European
aparc_DKTatlas_rh_area_rostralmiddlefrontal_PMID33875891	Brain MRI	Cortical area	Area of rostralmiddlefrontal in the right hemisphere generated by parcellation of the white surface using DKT parcellation	Rostralmiddlefrontal	33875891	31968	0	0	European
aparc_DKTatlas_rh_area_superiorfrontal_PMID33875891	Brain MRI	Cortical area	Area of superiorfrontal in the right hemisphere generated by parcellation of the white surface using DKT parcellation	Superiorfrontal	33875891	31968	0	0	European
aparc_DKTatlas_rh_area_superiorparietal_PMID33875891	Brain MRI	Cortical area	Area of superiorparietal in the right hemisphere generated by parcellation of the white surface using DKT parcellation	Superiorparietal	33875891	31968	0	0	European
aparc_DKTatlas_rh_area_superiortemporal_PMID33875891	Brain MRI	Cortical area	Area of superiortemporal in the right hemisphere generated by parcellation of the white surface using DKT parcellation	Superiortemporal	33875891	31968	0	0	European
aparc_DKTatlas_rh_area_supramarginal_PMID33875891	Brain MRI	Cortical area	Area of supramarginal in the right hemisphere generated by parcellation of the white surface using DKT parcellation	Supramarginal	33875891	31968	0	0	European
aparc_DKTatlas_rh_area_transversetemporal_PMID33875891	Brain MRI	Cortical area	Area of transversetemporal in the right hemisphere generated by parcellation of the white surface using DKT parcellation	Transversetemporal	33875891	31967	0	0	European
aparc_DKTatlas_rh_thickness_caudalanteriorcingulate_PMID33875891	Brain MRI	Cortical thickness	Mean thickness of caudalanteriorcingulate in the right hemisphere generated by parcellation of the white surface using DKT parcellation	CaudalanteriorCingulate	33875891	31966	0	0	European
aparc_DKTatlas_rh_thickness_caudalmiddlefrontal_PMID33875891	Brain MRI	Cortical thickness	Mean thickness of caudalmiddlefrontal in the right hemisphere generated by parcellation of the white surface using DKT parcellation	Caudalmiddlefrontal	33875891	31968	0	0	European
aparc_DKTatlas_rh_thickness_cuneus_PMID33875891	Brain MRI	Cortical thickness	Mean thickness of cuneus in the right hemisphere generated by parcellation of the white surface using DKT parcellation	Cuneus	33875891	31968	0	0	European
aparc_DKTatlas_rh_thickness_entorhinal_PMID33875891	Brain MRI	Cortical thickness	Mean thickness of entorhinal in the right hemisphere generated by parcellation of the white surface using DKT parcellation	Entorhinal	33875891	31968	0	0	European
aparc_DKTatlas_rh_thickness_fusiform_PMID33875891	Brain MRI	Cortical thickness	Mean thickness of fusiform in the right hemisphere generated by parcellation of the white surface using DKT parcellation	Fusiform	33875891	31968	0	0	European
aparc_DKTatlas_rh_thickness_inferiorparietal_PMID33875891	Brain MRI	Cortical thickness	Mean thickness of inferiorparietal in the right hemisphere generated by parcellation of the white surface using DKT parcellation	Inferiorparietal	33875891	31968	0	0	European
aparc_DKTatlas_rh_thickness_inferiortemporal_PMID33875891	Brain MRI	Cortical thickness	Mean thickness of inferiortemporal in the right hemisphere generated by parcellation of the white surface using DKT parcellation	Inferiortemporal	33875891	31968	0	0	European
aparc_DKTatlas_rh_thickness_insula_PMID33875891	Brain MRI	Cortical thickness	Mean thickness of insula in the right hemisphere generated by parcellation of the white surface using DKT parcellation	Insula	33875891	31968	0	0	European
aparc_DKTatlas_rh_thickness_isthmuscingulate_PMID33875891	Brain MRI	Cortical thickness	Mean thickness of isthmuscingulate in the right hemisphere generated by parcellation of the white surface using DKT parcellation	IsthmusCingulate	33875891	31968	0	0	European
aparc_DKTatlas_rh_thickness_lateraloccipital_PMID33875891	Brain MRI	Cortical thickness	Mean thickness of lateraloccipital in the right hemisphere generated by parcellation of the white surface using DKT parcellation	Lateraloccipital	33875891	31968	0	0	European
aparc_DKTatlas_rh_thickness_lateralorbitofrontal_PMID33875891	Brain MRI	Cortical thickness	Mean thickness of lateralorbitofrontal in the right hemisphere generated by parcellation of the white surface using DKT parcellation	Lateralorbitofrontal	33875891	31968	0	0	European
aparc_DKTatlas_rh_thickness_lingual_PMID33875891	Brain MRI	Cortical thickness	Mean thickness of lingual in the right hemisphere generated by parcellation of the white surface using DKT parcellation	Lingual	33875891	31968	0	0	European
aparc_DKTatlas_rh_thickness_medialorbitofrontal_PMID33875891	Brain MRI	Cortical thickness	Mean thickness of medialorbitofrontal in the right hemisphere generated by parcellation of the white surface using DKT parcellation	Medialorbitofrontal	33875891	31968	0	0	European
aparc_DKTatlas_rh_thickness_middletemporal_PMID33875891	Brain MRI	Cortical thickness	Mean thickness of middletemporal in the right hemisphere generated by parcellation of the white surface using DKT parcellation	Middletemporal	33875891	31968	0	0	European
aparc_DKTatlas_rh_thickness_paracentral_PMID33875891	Brain MRI	Cortical thickness	Mean thickness of paracentral in the right hemisphere generated by parcellation of the white surface using DKT parcellation	Paracentral	33875891	31968	0	0	European
aparc_DKTatlas_rh_thickness_parahippocampal_PMID33875891	Brain MRI	Cortical thickness	Mean thickness of parahippocampal in the right hemisphere generated by parcellation of the white surface using DKT parcellation	ParaHippocampal	33875891	31968	0	0	European
aparc_DKTatlas_rh_thickness_parsopercularis_PMID33875891	Brain MRI	Cortical thickness	Mean thickness of parsopercularis in the right hemisphere generated by parcellation of the white surface using DKT parcellation	Parsopercularis	33875891	31968	0	0	European
aparc_DKTatlas_rh_thickness_parsorbitalis_PMID33875891	Brain MRI	Cortical thickness	Mean thickness of parsorbitalis in the right hemisphere generated by parcellation of the white surface using DKT parcellation	Parsorbitalis	33875891	31966	0	0	European
aparc_DKTatlas_rh_thickness_parstriangularis_PMID33875891	Brain MRI	Cortical thickness	Mean thickness of parstriangularis in the right hemisphere generated by parcellation of the white surface using DKT parcellation	Parstriangularis	33875891	31967	0	0	European
aparc_DKTatlas_rh_thickness_pericalcarine_PMID33875891	Brain MRI	Cortical thickness	Mean thickness of pericalcarine in the right hemisphere generated by parcellation of the white surface using DKT parcellation	Pericalcarine	33875891	31968	0	0	European
aparc_DKTatlas_rh_thickness_postcentral_PMID33875891	Brain MRI	Cortical thickness	Mean thickness of postcentral in the right hemisphere generated by parcellation of the white surface using DKT parcellation	Postcentral	33875891	31968	0	0	European
aparc_DKTatlas_rh_thickness_posteriorcingulate_PMID33875891	Brain MRI	Cortical thickness	Mean thickness of posteriorcingulate in the right hemisphere generated by parcellation of the white surface using DKT parcellation	PosteriorCingulate	33875891	31968	0	0	European
aparc_DKTatlas_rh_thickness_precentral_PMID33875891	Brain MRI	Cortical thickness	Mean thickness of precentral in the right hemisphere generated by parcellation of the white surface using DKT parcellation	Precentral	33875891	31968	0	0	European
aparc_DKTatlas_rh_thickness_precuneus_PMID33875891	Brain MRI	Cortical thickness	Mean thickness of precuneus in the right hemisphere generated by parcellation of the white surface using DKT parcellation	preCuneus	33875891	31968	0	0	European
aparc_DKTatlas_rh_thickness_rostralanteriorcingulate_PMID33875891	Brain MRI	Cortical thickness	Mean thickness of rostralanteriorcingulate in the right hemisphere generated by parcellation of the white surface using DKT parcellation	RostralanteriorCingulate	33875891	31967	0	0	European
aparc_DKTatlas_rh_thickness_rostralmiddlefrontal_PMID33875891	Brain MRI	Cortical thickness	Mean thickness of rostralmiddlefrontal in the right hemisphere generated by parcellation of the white surface using DKT parcellation	Rostralmiddlefrontal	33875891	31968	0	0	European
aparc_DKTatlas_rh_thickness_superiorfrontal_PMID33875891	Brain MRI	Cortical thickness	Mean thickness of superiorfrontal in the right hemisphere generated by parcellation of the white surface using DKT parcellation	Superiorfrontal	33875891	31968	0	0	European
aparc_DKTatlas_rh_thickness_superiorparietal_PMID33875891	Brain MRI	Cortical thickness	Mean thickness of superiorparietal in the right hemisphere generated by parcellation of the white surface using DKT parcellation	Superiorparietal	33875891	31968	0	0	European
aparc_DKTatlas_rh_thickness_superiortemporal_PMID33875891	Brain MRI	Cortical thickness	Mean thickness of superiortemporal in the right hemisphere generated by parcellation of the white surface using DKT parcellation	Superiortemporal	33875891	31968	0	0	European
aparc_DKTatlas_rh_thickness_supramarginal_PMID33875891	Brain MRI	Cortical thickness	Mean thickness of supramarginal in the right hemisphere generated by parcellation of the white surface using DKT parcellation	Supramarginal	33875891	31968	0	0	European
aparc_DKTatlas_rh_thickness_transversetemporal_PMID33875891	Brain MRI	Cortical thickness	Mean thickness of transversetemporal in the right hemisphere generated by parcellation of the white surface using DKT parcellation	Transversetemporal	33875891	31967	0	0	European
aparc_DKTatlas_rh_volume_caudalanteriorcingulate_PMID33875891	Brain MRI	Regional and tissue volume	Volume of caudalanteriorcingulate in the right hemisphere generated by parcellation of the white surface using DKT parcellation	CaudalanteriorCingulate	33875891	31966	0	0	European
aparc_DKTatlas_rh_volume_caudalmiddlefrontal_PMID33875891	Brain MRI	Regional and tissue volume	Volume of caudalmiddlefrontal in the right hemisphere generated by parcellation of the white surface using DKT parcellation	Caudalmiddlefrontal	33875891	31968	0	0	European
aparc_DKTatlas_rh_volume_cuneus_PMID33875891	Brain MRI	Regional and tissue volume	Volume of cuneus in the right hemisphere generated by parcellation of the white surface using DKT parcellation	Cuneus	33875891	31968	0	0	European
aparc_DKTatlas_rh_volume_entorhinal_PMID33875891	Brain MRI	Regional and tissue volume	Volume of entorhinal in the right hemisphere generated by parcellation of the white surface using DKT parcellation	Entorhinal	33875891	31968	0	0	European
aparc_DKTatlas_rh_volume_fusiform_PMID33875891	Brain MRI	Regional and tissue volume	Volume of fusiform in the right hemisphere generated by parcellation of the white surface using DKT parcellation	Fusiform	33875891	31968	0	0	European
aparc_DKTatlas_rh_volume_inferiorparietal_PMID33875891	Brain MRI	Regional and tissue volume	Volume of inferiorparietal in the right hemisphere generated by parcellation of the white surface using DKT parcellation	Inferiorparietal	33875891	31968	0	0	European
aparc_DKTatlas_rh_volume_inferiortemporal_PMID33875891	Brain MRI	Regional and tissue volume	Volume of inferiortemporal in the right hemisphere generated by parcellation of the white surface using DKT parcellation	Inferiortemporal	33875891	31968	0	0	European
aparc_DKTatlas_rh_volume_insula_PMID33875891	Brain MRI	Regional and tissue volume	Volume of insula in the right hemisphere generated by parcellation of the white surface using DKT parcellation	Insula	33875891	31968	0	0	European
aparc_DKTatlas_rh_volume_isthmuscingulate_PMID33875891	Brain MRI	Regional and tissue volume	Volume of isthmuscingulate in the right hemisphere generated by parcellation of the white surface using DKT parcellation	IsthmusCingulate	33875891	31968	0	0	European
aparc_DKTatlas_rh_volume_lateraloccipital_PMID33875891	Brain MRI	Regional and tissue volume	Volume of lateraloccipital in the right hemisphere generated by parcellation of the white surface using DKT parcellation	Lateraloccipital	33875891	31968	0	0	European
aparc_DKTatlas_rh_volume_lateralorbitofrontal_PMID33875891	Brain MRI	Regional and tissue volume	Volume of lateralorbitofrontal in the right hemisphere generated by parcellation of the white surface using DKT parcellation	Lateralorbitofrontal	33875891	31968	0	0	European
aparc_DKTatlas_rh_volume_lingual_PMID33875891	Brain MRI	Regional and tissue volume	Volume of lingual in the right hemisphere generated by parcellation of the white surface using DKT parcellation	Lingual	33875891	31968	0	0	European
aparc_DKTatlas_rh_volume_medialorbitofrontal_PMID33875891	Brain MRI	Regional and tissue volume	Volume of medialorbitofrontal in the right hemisphere generated by parcellation of the white surface using DKT parcellation	Medialorbitofrontal	33875891	31968	0	0	European
aparc_DKTatlas_rh_volume_middletemporal_PMID33875891	Brain MRI	Regional and tissue volume	Volume of middletemporal in the right hemisphere generated by parcellation of the white surface using DKT parcellation	Middletemporal	33875891	31968	0	0	European
aparc_DKTatlas_rh_volume_paracentral_PMID33875891	Brain MRI	Regional and tissue volume	Volume of paracentral in the right hemisphere generated by parcellation of the white surface using DKT parcellation	Paracentral	33875891	31968	0	0	European
aparc_DKTatlas_rh_volume_parahippocampal_PMID33875891	Brain MRI	Regional and tissue volume	Volume of parahippocampal in the right hemisphere generated by parcellation of the white surface using DKT parcellation	ParaHippocampal	33875891	31968	0	0	European
aparc_DKTatlas_rh_volume_parsopercularis_PMID33875891	Brain MRI	Regional and tissue volume	Volume of parsopercularis in the right hemisphere generated by parcellation of the white surface using DKT parcellation	Parsopercularis	33875891	31968	0	0	European
aparc_DKTatlas_rh_volume_parsorbitalis_PMID33875891	Brain MRI	Regional and tissue volume	Volume of parsorbitalis in the right hemisphere generated by parcellation of the white surface using DKT parcellation	Parsorbitalis	33875891	31966	0	0	European
aparc_DKTatlas_rh_volume_parstriangularis_PMID33875891	Brain MRI	Regional and tissue volume	Volume of parstriangularis in the right hemisphere generated by parcellation of the white surface using DKT parcellation	Parstriangularis	33875891	31967	0	0	European
aparc_DKTatlas_rh_volume_pericalcarine_PMID33875891	Brain MRI	Regional and tissue volume	Volume of pericalcarine in the right hemisphere generated by parcellation of the white surface using DKT parcellation	Pericalcarine	33875891	31968	0	0	European
aparc_DKTatlas_rh_volume_postcentral_PMID33875891	Brain MRI	Regional and tissue volume	Volume of postcentral in the right hemisphere generated by parcellation of the white surface using DKT parcellation	Postcentral	33875891	31968	0	0	European
aparc_DKTatlas_rh_volume_posteriorcingulate_PMID33875891	Brain MRI	Regional and tissue volume	Volume of posteriorcingulate in the right hemisphere generated by parcellation of the white surface using DKT parcellation	PosteriorCingulate	33875891	31968	0	0	European
aparc_DKTatlas_rh_volume_precentral_PMID33875891	Brain MRI	Regional and tissue volume	Volume of precentral in the right hemisphere generated by parcellation of the white surface using DKT parcellation	Precentral	33875891	31968	0	0	European
aparc_DKTatlas_rh_volume_precuneus_PMID33875891	Brain MRI	Regional and tissue volume	Volume of precuneus in the right hemisphere generated by parcellation of the white surface using DKT parcellation	preCuneus	33875891	31968	0	0	European
aparc_DKTatlas_rh_volume_rostralanteriorcingulate_PMID33875891	Brain MRI	Regional and tissue volume	Volume of rostralanteriorcingulate in the right hemisphere generated by parcellation of the white surface using DKT parcellation	RostralanteriorCingulate	33875891	31967	0	0	European
aparc_DKTatlas_rh_volume_rostralmiddlefrontal_PMID33875891	Brain MRI	Regional and tissue volume	Volume of rostralmiddlefrontal in the right hemisphere generated by parcellation of the white surface using DKT parcellation	Rostralmiddlefrontal	33875891	31968	0	0	European
aparc_DKTatlas_rh_volume_superiorfrontal_PMID33875891	Brain MRI	Regional and tissue volume	Volume of superiorfrontal in the right hemisphere generated by parcellation of the white surface using DKT parcellation	Superiorfrontal	33875891	31968	0	0	European
aparc_DKTatlas_rh_volume_superiorparietal_PMID33875891	Brain MRI	Regional and tissue volume	Volume of superiorparietal in the right hemisphere generated by parcellation of the white surface using DKT parcellation	Superiorparietal	33875891	31968	0	0	European
aparc_DKTatlas_rh_volume_superiortemporal_PMID33875891	Brain MRI	Regional and tissue volume	Volume of superiortemporal in the right hemisphere generated by parcellation of the white surface using DKT parcellation	Superiortemporal	33875891	31968	0	0	European
aparc_DKTatlas_rh_volume_supramarginal_PMID33875891	Brain MRI	Regional and tissue volume	Volume of supramarginal in the right hemisphere generated by parcellation of the white surface using DKT parcellation	Supramarginal	33875891	31968	0	0	European
aparc_DKTatlas_rh_volume_transversetemporal_PMID33875891	Brain MRI	Regional and tissue volume	Volume of transversetemporal in the right hemisphere generated by parcellation of the white surface using DKT parcellation	Transversetemporal	33875891	31967	0	0	European
aseg_global_intensity_3rd_Ventricle_PMID33875891	Brain MRI	Regional and tissue intensity	Mean intensity of 3rd-Ventricle in the whole brain generated by subcortical volumetric segmentation (aseg)	3rd-Ventricle, whole brain	33875891	31968	0	0	European
aseg_global_intensity_4th_Ventricle_PMID33875891	Brain MRI	Regional and tissue intensity	Mean intensity of 4th-Ventricle in the whole brain generated by subcortical volumetric segmentation (aseg)	4th-Ventricle, whole brain	33875891	31968	0	0	European
aseg_global_intensity_5th_Ventricle_PMID33875891	Brain MRI	Regional and tissue intensity	Mean intensity of 5th-Ventricle in the whole brain generated by subcortical volumetric segmentation (aseg)	5th-Ventricle, whole brain	33875891	31968	0	0	European
aseg_global_intensity_Brain_Stem_PMID33875891	Brain MRI	Regional and tissue intensity	Mean intensity of Brain-Stem in the whole brain generated by subcortical volumetric segmentation (aseg)	Brain-Stem, whole brain	33875891	31968	0	0	European
aseg_global_intensity_CC_Anterior_PMID33875891	Brain MRI	Regional and tissue intensity	Mean intensity of CC-Anterior in the whole brain generated by subcortical volumetric segmentation (aseg)	CC-Anterior, whole brain	33875891	31968	0	0	European
aseg_global_intensity_CC_Central_PMID33875891	Brain MRI	Regional and tissue intensity	Mean intensity of CC-Central in the whole brain generated by subcortical volumetric segmentation (aseg)	CC-Central, whole brain	33875891	31968	0	0	European
aseg_global_intensity_CC_Mid_Anterior_PMID33875891	Brain MRI	Regional and tissue intensity	Mean intensity of CC-Mid-Anterior in the whole brain generated by subcortical volumetric segmentation (aseg)	CC-Mid-Anterior, whole brain	33875891	31968	0	0	European
aseg_global_intensity_CC_Mid_Posterior_PMID33875891	Brain MRI	Regional and tissue intensity	Mean intensity of CC-Mid-Posterior in the whole brain generated by subcortical volumetric segmentation (aseg)	CC-Mid-Posterior, whole brain	33875891	31968	0	0	European
aseg_global_intensity_CC_Posterior_PMID33875891	Brain MRI	Regional and tissue intensity	Mean intensity of CC-Posterior in the whole brain generated by subcortical volumetric segmentation (aseg)	CC-Posterior, whole brain	33875891	31968	0	0	European
aseg_global_intensity_CSF_PMID33875891	Brain MRI	Regional and tissue intensity	Mean intensity of CSF in the whole brain generated by subcortical volumetric segmentation (aseg)	CSF, whole brain	33875891	31968	0	0	European
aseg_global_intensity_non_WM_hypointensities_PMID33875891	Brain MRI	Regional and tissue intensity	Mean intensity of non-WM-hypointensities in the whole brain generated by subcortical volumetric segmentation (aseg)	non-WM-hypointensities, whole brain	33875891	31968	0	0	European
aseg_global_intensity_Optic_Chiasm_PMID33875891	Brain MRI	Regional and tissue intensity	Mean intensity of Optic-Chiasm in the whole brain generated by subcortical volumetric segmentation (aseg)	Optic-Chiasm, whole brain	33875891	31968	0	0	European
aseg_global_intensity_WM_hypointensities_PMID33875891	Brain MRI	Regional and tissue intensity	Mean intensity of WM-hypointensities in the whole brain generated by subcortical volumetric segmentation (aseg)	WM-hypointensities, whole brain	33875891	31968	0	0	European
aseg_global_volume_3rd_Ventricle_PMID33875891	Brain MRI	Regional and tissue volume	Volume of 3rd-Ventricle in the whole brain generated by subcortical volumetric segmentation (aseg)	3rd-Ventricle, whole brain	33875891	31968	0	0	European
aseg_global_volume_4th_Ventricle_PMID33875891	Brain MRI	Regional and tissue volume	Volume of 4th-Ventricle in the whole brain generated by subcortical volumetric segmentation (aseg)	4th-Ventricle, whole brain	33875891	31968	0	0	European
aseg_global_volume_5th_Ventricle_PMID33875891	Brain MRI	Regional and tissue volume	Volume of 5th-Ventricle in the whole brain generated by subcortical volumetric segmentation (aseg)	5th-Ventricle, whole brain	33875891	31968	0	0	European
aseg_global_volume_Brain_Stem_PMID33875891	Brain MRI	Regional and tissue volume	Volume of Brain-Stem in the whole brain generated by subcortical volumetric segmentation (aseg)	Brain-Stem, whole brain	33875891	31968	0	0	European
aseg_global_volume_BrainSeg_PMID33875891	Brain MRI	Regional and tissue volume	Volume of BrainSeg in the whole brain generated by subcortical volumetric segmentation (aseg)	BrainSeg, whole brain	33875891	31968	0	0	European
aseg_global_volume_BrainSegNotVent_PMID33875891	Brain MRI	Regional and tissue volume	Volume of BrainSegNotVent in the whole brain generated by subcortical volumetric segmentation (aseg)	BrainSegNotVent, whole brain	33875891	31968	0	0	European
aseg_global_volume_BrainSegNotVentSurf_PMID33875891	Brain MRI	Regional and tissue volume	Volume of BrainSegNotVentSurf in the whole brain generated by subcortical volumetric segmentation (aseg)	BrainSegNotVentSurf, whole brain	33875891	31968	0	0	European
aseg_global_volume_CC_Anterior_PMID33875891	Brain MRI	Regional and tissue volume	Volume of CC-Anterior in the whole brain generated by subcortical volumetric segmentation (aseg)	CC-Anterior, whole brain	33875891	31968	0	0	European
aseg_global_volume_CC_Central_PMID33875891	Brain MRI	Regional and tissue volume	Volume of CC-Central in the whole brain generated by subcortical volumetric segmentation (aseg)	CC-Central, whole brain	33875891	31968	0	0	European
aseg_global_volume_CC_Mid_Anterior_PMID33875891	Brain MRI	Regional and tissue volume	Volume of CC-Mid-Anterior in the whole brain generated by subcortical volumetric segmentation (aseg)	CC-Mid-Anterior, whole brain	33875891	31968	0	0	European
aseg_global_volume_CC_Mid_Posterior_PMID33875891	Brain MRI	Regional and tissue volume	Volume of CC-Mid-Posterior in the whole brain generated by subcortical volumetric segmentation (aseg)	CC-Mid-Posterior, whole brain	33875891	31968	0	0	European
aseg_global_volume_CC_Posterior_PMID33875891	Brain MRI	Regional and tissue volume	Volume of CC-Posterior in the whole brain generated by subcortical volumetric segmentation (aseg)	CC-Posterior, whole brain	33875891	31968	0	0	European
aseg_global_volume_CSF_PMID33875891	Brain MRI	Regional and tissue volume	Volume of CSF in the whole brain generated by subcortical volumetric segmentation (aseg)	CSF, whole brain	33875891	31968	0	0	European
aseg_global_volume_EstimatedTotalIntraCranial_PMID33875891	Brain MRI	Regional and tissue volume	Volume of EstimatedTotalIntraCranial in the whole brain generated by subcortical volumetric segmentation (aseg)	EstimatedTotalIntraCranial, whole brain	33875891	31968	0	0	European
aseg_global_volume_non_WM_hypointensities_PMID33875891	Brain MRI	Regional and tissue volume	Volume of non-WM-hypointensities in the whole brain generated by subcortical volumetric segmentation (aseg)	non-WM-hypointensities, whole brain	33875891	31968	0	0	European
aseg_global_volume_Optic_Chiasm_PMID33875891	Brain MRI	Regional and tissue volume	Volume of Optic-Chiasm in the whole brain generated by subcortical volumetric segmentation (aseg)	Optic-Chiasm, whole brain	33875891	31968	0	0	European
aseg_global_volume_ratio_BrainSegVol_to_eTIV_PMID33875891	Brain MRI	Regional and tissue volume	Volume-ratio of BrainSegVol-to-eTIV in the whole brain generated by subcortical volumetric segmentation (aseg)	BrainSegVol-to-eTIV, whole brain	33875891	31968	0	0	European
aseg_global_volume_ratio_MaskVol_to_eTIV_PMID33875891	Brain MRI	Regional and tissue volume	Volume-ratio of MaskVol-to-eTIV in the whole brain generated by subcortical volumetric segmentation (aseg)	MaskVol-to-eTIV, whole brain	33875891	31968	0	0	European
aseg_global_volume_SubCortGray_PMID33875891	Brain MRI	Regional and tissue volume	Volume of SubCortGray in the whole brain generated by subcortical volumetric segmentation (aseg)	SubCortGray, whole brain	33875891	31968	0	0	European
aseg_global_volume_SupraTentorial_PMID33875891	Brain MRI	Regional and tissue volume	Volume of SupraTentorial in the whole brain generated by subcortical volumetric segmentation (aseg)	SupraTentorial, whole brain	33875891	31968	0	0	European
aseg_global_volume_SupraTentorialNotVent_PMID33875891	Brain MRI	Regional and tissue volume	Volume of SupraTentorialNotVent in the whole brain generated by subcortical volumetric segmentation (aseg)	SupraTentorialNotVent, whole brain	33875891	31968	0	0	European
aseg_global_volume_TotalGray_PMID33875891	Brain MRI	Regional and tissue volume	Volume of TotalGray in the whole brain generated by subcortical volumetric segmentation (aseg)	TotalGray, whole brain	33875891	31968	0	0	European
aseg_global_volume_VentricleChoroid_PMID33875891	Brain MRI	Regional and tissue volume	Volume of VentricleChoroid in the whole brain generated by subcortical volumetric segmentation (aseg)	VentricleChoroid, whole brain	33875891	31968	0	0	European
aseg_global_volume_WM_hypointensities_PMID33875891	Brain MRI	Regional and tissue volume	Volume of WM-hypointensities in the whole brain generated by subcortical volumetric segmentation (aseg)	WM-hypointensities, whole brain	33875891	31968	0	0	European
aseg_lh_intensity_Accumbens_area_PMID33875891	Brain MRI	Regional and tissue intensity	Mean intensity of Accumbens-area in the left hemisphere generated by subcortical volumetric segmentation (aseg)	Accumbens-area	33875891	31968	0	0	European
aseg_lh_intensity_Amygdala_PMID33875891	Brain MRI	Regional and tissue intensity	Mean intensity of Amygdala in the left hemisphere generated by subcortical volumetric segmentation (aseg)	Amygdala	33875891	31968	0	0	European
aseg_lh_intensity_Caudate_PMID33875891	Brain MRI	Regional and tissue intensity	Mean intensity of Caudate in the left hemisphere generated by subcortical volumetric segmentation (aseg)	Caudate	33875891	31968	0	0	European
aseg_lh_intensity_Cerebellum_Cortex_PMID33875891	Brain MRI	Regional and tissue intensity	Mean intensity of Cerebellum-Cortex in the left hemisphere generated by subcortical volumetric segmentation (aseg)	Cerebellum-Cortex	33875891	31968	0	0	European
aseg_lh_intensity_Cerebellum_White_Matter_PMID33875891	Brain MRI	Regional and tissue intensity	Mean intensity of Cerebellum-White-Matter in the left hemisphere generated by subcortical volumetric segmentation (aseg)	Cerebellum-White-Matter	33875891	31968	0	0	European
aseg_lh_intensity_choroid_plexus_PMID33875891	Brain MRI	Regional and tissue intensity	Mean intensity of choroid-plexus in the left hemisphere generated by subcortical volumetric segmentation (aseg)	Choroid-plexus	33875891	31968	0	0	European
aseg_lh_intensity_Hippocampus_PMID33875891	Brain MRI	Regional and tissue intensity	Mean intensity of Hippocampus in the left hemisphere generated by subcortical volumetric segmentation (aseg)	Hippocampus	33875891	31968	0	0	European
aseg_lh_intensity_Inf_Lat_Vent_PMID33875891	Brain MRI	Regional and tissue intensity	Mean intensity of Inf-Lat-Vent in the left hemisphere generated by subcortical volumetric segmentation (aseg)	Inf-Lat-Vent	33875891	31968	0	0	European
aseg_lh_intensity_Lateral_Ventricle_PMID33875891	Brain MRI	Regional and tissue intensity	Mean intensity of Lateral-Ventricle in the left hemisphere generated by subcortical volumetric segmentation (aseg)	Lateral-Ventricle	33875891	31968	0	0	European
aseg_lh_intensity_Pallidum_PMID33875891	Brain MRI	Regional and tissue intensity	Mean intensity of Pallidum in the left hemisphere generated by subcortical volumetric segmentation (aseg)	Pallidum	33875891	31968	0	0	European
aseg_lh_intensity_Putamen_PMID33875891	Brain MRI	Regional and tissue intensity	Mean intensity of Putamen in the left hemisphere generated by subcortical volumetric segmentation (aseg)	Putamen	33875891	31968	0	0	European
aseg_lh_intensity_Thalamus_Proper_PMID33875891	Brain MRI	Regional and tissue intensity	Mean intensity of Thalamus-Proper in the left hemisphere generated by subcortical volumetric segmentation (aseg)	Thalamus-Proper	33875891	31967	0	0	European
aseg_lh_intensity_VentralDC_PMID33875891	Brain MRI	Regional and tissue intensity	Mean intensity of VentralDC in the left hemisphere generated by subcortical volumetric segmentation (aseg)	VentralDC	33875891	31968	0	0	European
aseg_lh_intensity_vessel_PMID33875891	Brain MRI	Regional and tissue intensity	Mean intensity of vessel in the left hemisphere generated by subcortical volumetric segmentation (aseg)	vessel	33875891	31968	0	0	European
aseg_lh_number_HolesBeforeFixing_PMID33875891	Brain MRI	Regional and tissue volume	Number of HolesBeforeFixing in the left hemisphere generated by subcortical volumetric segmentation (aseg)	HolesBeforeFixing	33875891	31968	0	0	European
aseg_lh_volume_Accumbens_area_PMID33875891	Brain MRI	Regional and tissue volume	Volume of Accumbens-area in the left hemisphere generated by subcortical volumetric segmentation (aseg)	Accumbens-area	33875891	31968	0	0	European
aseg_lh_volume_Amygdala_PMID33875891	Brain MRI	Regional and tissue volume	Volume of Amygdala in the left hemisphere generated by subcortical volumetric segmentation (aseg)	Amygdala	33875891	31968	0	0	European
aseg_lh_volume_Caudate_PMID33875891	Brain MRI	Regional and tissue volume	Volume of Caudate in the left hemisphere generated by subcortical volumetric segmentation (aseg)	Caudate	33875891	31968	0	0	European
aseg_lh_volume_Cerebellum_Cortex_PMID33875891	Brain MRI	Regional and tissue volume	Volume of Cerebellum-Cortex in the left hemisphere generated by subcortical volumetric segmentation (aseg)	Cerebellum-Cortex	33875891	31968	0	0	European
aseg_lh_volume_Cerebellum_White_Matter_PMID33875891	Brain MRI	Regional and tissue volume	Volume of Cerebellum-White-Matter in the left hemisphere generated by subcortical volumetric segmentation (aseg)	Cerebellum-White-Matter	33875891	31968	0	0	European
aseg_lh_volume_CerebralWhiteMatter_PMID33875891	Brain MRI	Regional and tissue volume	Volume of CerebralWhiteMatter in the left hemisphere generated by subcortical volumetric segmentation (aseg)	CerebralWhiteMatter	33875891	31968	0	0	European
aseg_lh_volume_choroid_plexus_PMID33875891	Brain MRI	Regional and tissue volume	Volume of choroid-plexus in the left hemisphere generated by subcortical volumetric segmentation (aseg)	Choroid-plexus	33875891	31968	0	0	European
aseg_lh_volume_Cortex_PMID33875891	Brain MRI	Regional and tissue volume	Volume of Cortex in the left hemisphere generated by subcortical volumetric segmentation (aseg)	Cortex	33875891	31968	0	0	European
aseg_lh_volume_Hippocampus_PMID33875891	Brain MRI	Regional and tissue volume	Volume of Hippocampus in the left hemisphere generated by subcortical volumetric segmentation (aseg)	Hippocampus	33875891	31968	0	0	European
aseg_lh_volume_Inf_Lat_Vent_PMID33875891	Brain MRI	Regional and tissue volume	Volume of Inf-Lat-Vent in the left hemisphere generated by subcortical volumetric segmentation (aseg)	Inf-Lat-Vent	33875891	31968	0	0	European
aseg_lh_volume_Lateral_Ventricle_PMID33875891	Brain MRI	Regional and tissue volume	Volume of Lateral-Ventricle in the left hemisphere generated by subcortical volumetric segmentation (aseg)	Lateral-Ventricle	33875891	31968	0	0	European
aseg_lh_volume_Pallidum_PMID33875891	Brain MRI	Regional and tissue volume	Volume of Pallidum in the left hemisphere generated by subcortical volumetric segmentation (aseg)	Pallidum	33875891	31968	0	0	European
aseg_lh_volume_Putamen_PMID33875891	Brain MRI	Regional and tissue volume	Volume of Putamen in the left hemisphere generated by subcortical volumetric segmentation (aseg)	Putamen	33875891	31968	0	0	European
aseg_lh_volume_Thalamus_Proper_PMID33875891	Brain MRI	Regional and tissue volume	Volume of Thalamus-Proper in the left hemisphere generated by subcortical volumetric segmentation (aseg)	Thalamus-Proper	33875891	31967	0	0	European
aseg_lh_volume_VentralDC_PMID33875891	Brain MRI	Regional and tissue volume	Volume of VentralDC in the left hemisphere generated by subcortical volumetric segmentation (aseg)	VentralDC	33875891	31968	0	0	European
aseg_lh_volume_vessel_PMID33875891	Brain MRI	Regional and tissue volume	Volume of vessel in the left hemisphere generated by subcortical volumetric segmentation (aseg)	vessel	33875891	31968	0	0	European
aseg_rh_intensity_Accumbens_area_PMID33875891	Brain MRI	Regional and tissue intensity	Mean intensity of Accumbens-area in the right hemisphere generated by subcortical volumetric segmentation (aseg)	Accumbens-area	33875891	31968	0	0	European
aseg_rh_intensity_Amygdala_PMID33875891	Brain MRI	Regional and tissue intensity	Mean intensity of Amygdala in the right hemisphere generated by subcortical volumetric segmentation (aseg)	Amygdala	33875891	31968	0	0	European
aseg_rh_intensity_Caudate_PMID33875891	Brain MRI	Regional and tissue intensity	Mean intensity of Caudate in the right hemisphere generated by subcortical volumetric segmentation (aseg)	Caudate	33875891	31968	0	0	European
aseg_rh_intensity_Cerebellum_Cortex_PMID33875891	Brain MRI	Regional and tissue intensity	Mean intensity of Cerebellum-Cortex in the right hemisphere generated by subcortical volumetric segmentation (aseg)	Cerebellum-Cortex	33875891	31968	0	0	European
aseg_rh_intensity_Cerebellum_White_Matter_PMID33875891	Brain MRI	Regional and tissue intensity	Mean intensity of Cerebellum-White-Matter in the right hemisphere generated by subcortical volumetric segmentation (aseg)	Cerebellum-White-Matter	33875891	31968	0	0	European
aseg_rh_intensity_choroid_plexus_PMID33875891	Brain MRI	Regional and tissue intensity	Mean intensity of choroid-plexus in the right hemisphere generated by subcortical volumetric segmentation (aseg)	Choroid-plexus	33875891	31968	0	0	European
aseg_rh_intensity_Hippocampus_PMID33875891	Brain MRI	Regional and tissue intensity	Mean intensity of Hippocampus in the right hemisphere generated by subcortical volumetric segmentation (aseg)	Hippocampus	33875891	31968	0	0	European
aseg_rh_intensity_Inf_Lat_Vent_PMID33875891	Brain MRI	Regional and tissue intensity	Mean intensity of Inf-Lat-Vent in the right hemisphere generated by subcortical volumetric segmentation (aseg)	Inf-Lat-Vent	33875891	31968	0	0	European
aseg_rh_intensity_Lateral_Ventricle_PMID33875891	Brain MRI	Regional and tissue intensity	Mean intensity of Lateral-Ventricle in the right hemisphere generated by subcortical volumetric segmentation (aseg)	Lateral-Ventricle	33875891	31968	0	0	European
aseg_rh_intensity_Pallidum_PMID33875891	Brain MRI	Regional and tissue intensity	Mean intensity of Pallidum in the right hemisphere generated by subcortical volumetric segmentation (aseg)	Pallidum	33875891	31968	0	0	European
aseg_rh_intensity_Putamen_PMID33875891	Brain MRI	Regional and tissue intensity	Mean intensity of Putamen in the right hemisphere generated by subcortical volumetric segmentation (aseg)	Putamen	33875891	31968	0	0	European
aseg_rh_intensity_Thalamus_Proper_PMID33875891	Brain MRI	Regional and tissue intensity	Mean intensity of Thalamus-Proper in the right hemisphere generated by subcortical volumetric segmentation (aseg)	Thalamus-Proper	33875891	31967	0	0	European
aseg_rh_intensity_VentralDC_PMID33875891	Brain MRI	Regional and tissue intensity	Mean intensity of VentralDC in the right hemisphere generated by subcortical volumetric segmentation (aseg)	VentralDC	33875891	31968	0	0	European
aseg_rh_intensity_vessel_PMID33875891	Brain MRI	Regional and tissue intensity	Mean intensity of vessel in the right hemisphere generated by subcortical volumetric segmentation (aseg)	vessel	33875891	31968	0	0	European
aseg_rh_number_HolesBeforeFixing_PMID33875891	Brain MRI	Regional and tissue volume	Number of HolesBeforeFixing in the right hemisphere generated by subcortical volumetric segmentation (aseg)	HolesBeforeFixing	33875891	31968	0	0	European
aseg_rh_volume_Accumbens_area_PMID33875891	Brain MRI	Regional and tissue volume	Volume of Accumbens-area in the right hemisphere generated by subcortical volumetric segmentation (aseg)	Accumbens-area	33875891	31968	0	0	European
aseg_rh_volume_Amygdala_PMID33875891	Brain MRI	Regional and tissue volume	Volume of Amygdala in the right hemisphere generated by subcortical volumetric segmentation (aseg)	Amygdala	33875891	31968	0	0	European
aseg_rh_volume_Caudate_PMID33875891	Brain MRI	Regional and tissue volume	Volume of Caudate in the right hemisphere generated by subcortical volumetric segmentation (aseg)	Caudate	33875891	31968	0	0	European
aseg_rh_volume_Cerebellum_Cortex_PMID33875891	Brain MRI	Regional and tissue volume	Volume of Cerebellum-Cortex in the right hemisphere generated by subcortical volumetric segmentation (aseg)	Cerebellum-Cortex	33875891	31968	0	0	European
aseg_rh_volume_Cerebellum_White_Matter_PMID33875891	Brain MRI	Regional and tissue volume	Volume of Cerebellum-White-Matter in the right hemisphere generated by subcortical volumetric segmentation (aseg)	Cerebellum-White-Matter	33875891	31968	0	0	European
aseg_rh_volume_CerebralWhiteMatter_PMID33875891	Brain MRI	Regional and tissue volume	Volume of CerebralWhiteMatter in the right hemisphere generated by subcortical volumetric segmentation (aseg)	CerebralWhiteMatter	33875891	31968	0	0	European
aseg_rh_volume_choroid_plexus_PMID33875891	Brain MRI	Regional and tissue volume	Volume of choroid-plexus in the right hemisphere generated by subcortical volumetric segmentation (aseg)	Choroid-plexus	33875891	31968	0	0	European
aseg_rh_volume_Cortex_PMID33875891	Brain MRI	Regional and tissue volume	Volume of Cortex in the right hemisphere generated by subcortical volumetric segmentation (aseg)	Cortex	33875891	31968	0	0	European
aseg_rh_volume_Hippocampus_PMID33875891	Brain MRI	Regional and tissue volume	Volume of Hippocampus in the right hemisphere generated by subcortical volumetric segmentation (aseg)	Hippocampus	33875891	31968	0	0	European
aseg_rh_volume_Inf_Lat_Vent_PMID33875891	Brain MRI	Regional and tissue volume	Volume of Inf-Lat-Vent in the right hemisphere generated by subcortical volumetric segmentation (aseg)	Inf-Lat-Vent	33875891	31968	0	0	European
aseg_rh_volume_Lateral_Ventricle_PMID33875891	Brain MRI	Regional and tissue volume	Volume of Lateral-Ventricle in the right hemisphere generated by subcortical volumetric segmentation (aseg)	Lateral-Ventricle	33875891	31968	0	0	European
aseg_rh_volume_Pallidum_PMID33875891	Brain MRI	Regional and tissue volume	Volume of Pallidum in the right hemisphere generated by subcortical volumetric segmentation (aseg)	Pallidum	33875891	31968	0	0	European
aseg_rh_volume_Putamen_PMID33875891	Brain MRI	Regional and tissue volume	Volume of Putamen in the right hemisphere generated by subcortical volumetric segmentation (aseg)	Putamen	33875891	31968	0	0	European
aseg_rh_volume_Thalamus_Proper_PMID33875891	Brain MRI	Regional and tissue volume	Volume of Thalamus-Proper in the right hemisphere generated by subcortical volumetric segmentation (aseg)	Thalamus-Proper	33875891	31967	0	0	European
aseg_rh_volume_VentralDC_PMID33875891	Brain MRI	Regional and tissue volume	Volume of VentralDC in the right hemisphere generated by subcortical volumetric segmentation (aseg)	VentralDC	33875891	31968	0	0	European
aseg_rh_volume_vessel_PMID33875891	Brain MRI	Regional and tissue volume	Volume of vessel in the right hemisphere generated by subcortical volumetric segmentation (aseg)	vessel	33875891	31968	0	0	European
Brainstem_global_volume_Medulla_PMID33875891	Brain MRI	Regional and tissue volume	Volume of Medulla in the whole brain generated by subcortical volumetric sub-segmentation of the Brainstem	Medulla, whole brain	33875891	31968	0	0	European
Brainstem_global_volume_Midbrain_PMID33875891	Brain MRI	Regional and tissue volume	Volume of Midbrain in the whole brain generated by subcortical volumetric sub-segmentation of the Brainstem	Midbrain, whole brain	33875891	31968	0	0	European
Brainstem_global_volume_Pons_PMID33875891	Brain MRI	Regional and tissue volume	Volume of Pons in the whole brain generated by subcortical volumetric sub-segmentation of the Brainstem	Pons, whole brain	33875891	31968	0	0	European
Brainstem_global_volume_SCP_PMID33875891	Brain MRI	Regional and tissue volume	Volume of SCP in the whole brain generated by subcortical volumetric sub-segmentation of the Brainstem	SCP, whole brain	33875891	31968	0	0	European
Brainstem_global_volume_Whole_brainstem_PMID33875891	Brain MRI	Regional and tissue volume	Volume of Whole-brainstem in the whole brain generated by subcortical volumetric sub-segmentation of the Brainstem	Whole-brainstem, whole brain	33875891	31968	0	0	European
HippSubfield_lh_volume_CA1_body_PMID33875891	Brain MRI	Regional and tissue volume	Volume of CA1-body in the left hemisphere generated by subcortical volumetric sub-segmentation of the Hippocampal Subfields	CA1-body	33875891	31968	0	0	European
HippSubfield_lh_volume_CA1_head_PMID33875891	Brain MRI	Regional and tissue volume	Volume of CA1-head in the left hemisphere generated by subcortical volumetric sub-segmentation of the Hippocampal Subfields	CA1-head	33875891	31968	0	0	European
HippSubfield_lh_volume_CA3_body_PMID33875891	Brain MRI	Regional and tissue volume	Volume of CA3-body in the left hemisphere generated by subcortical volumetric sub-segmentation of the Hippocampal Subfields	CA3-body	33875891	31968	0	0	European
HippSubfield_lh_volume_CA3_head_PMID33875891	Brain MRI	Regional and tissue volume	Volume of CA3-head in the left hemisphere generated by subcortical volumetric sub-segmentation of the Hippocampal Subfields	CA3-head	33875891	31968	0	0	European
HippSubfield_lh_volume_CA4_body_PMID33875891	Brain MRI	Regional and tissue volume	Volume of CA4-body in the left hemisphere generated by subcortical volumetric sub-segmentation of the Hippocampal Subfields	CA4-body	33875891	31968	0	0	European
HippSubfield_lh_volume_CA4_head_PMID33875891	Brain MRI	Regional and tissue volume	Volume of CA4-head in the left hemisphere generated by subcortical volumetric sub-segmentation of the Hippocampal Subfields	CA4-head	33875891	31968	0	0	European
HippSubfield_lh_volume_fimbria_PMID33875891	Brain MRI	Regional and tissue volume	Volume of fimbria in the left hemisphere generated by subcortical volumetric sub-segmentation of the Hippocampal Subfields	Fimbria	33875891	31968	0	0	European
HippSubfield_lh_volume_GC_ML_DG_body_PMID33875891	Brain MRI	Regional and tissue volume	Volume of GC-ML-DG-body in the left hemisphere generated by subcortical volumetric sub-segmentation of the Hippocampal Subfields	GC-ML-DG-body	33875891	31968	0	0	European
HippSubfield_lh_volume_GC_ML_DG_head_PMID33875891	Brain MRI	Regional and tissue volume	Volume of GC-ML-DG-head in the left hemisphere generated by subcortical volumetric sub-segmentation of the Hippocampal Subfields	GC-ML-DG-head	33875891	31968	0	0	European
HippSubfield_lh_volume_HATA_PMID33875891	Brain MRI	Regional and tissue volume	Volume of HATA in the left hemisphere generated by subcortical volumetric sub-segmentation of the Hippocampal Subfields	HATA	33875891	31968	0	0	European
HippSubfield_lh_volume_hippocampal_fissure_PMID33875891	Brain MRI	Regional and tissue volume	Volume of hippocampal-fissure in the left hemisphere generated by subcortical volumetric sub-segmentation of the Hippocampal Subfields	Hippocampal-fissure	33875891	31968	0	0	European
HippSubfield_lh_volume_Hippocampal_tail_PMID33875891	Brain MRI	Regional and tissue volume	Volume of Hippocampal-tail in the left hemisphere generated by subcortical volumetric sub-segmentation of the Hippocampal Subfields	Hippocampal-tail	33875891	31968	0	0	European
HippSubfield_lh_volume_molecular_layer_HP_body_PMID33875891	Brain MRI	Regional and tissue volume	Volume of molecular-layer-HP-body in the left hemisphere generated by subcortical volumetric sub-segmentation of the Hippocampal Subfields	Molecular-layer-HP-body	33875891	31968	0	0	European
HippSubfield_lh_volume_molecular_layer_HP_head_PMID33875891	Brain MRI	Regional and tissue volume	Volume of molecular-layer-HP-head in the left hemisphere generated by subcortical volumetric sub-segmentation of the Hippocampal Subfields	Molecular-layer-HP-head	33875891	31968	0	0	European
HippSubfield_lh_volume_parasubiculum_PMID33875891	Brain MRI	Regional and tissue volume	Volume of parasubiculum in the left hemisphere generated by subcortical volumetric sub-segmentation of the Hippocampal Subfields	ParaSubiculum	33875891	31968	0	0	European
HippSubfield_lh_volume_presubiculum_body_PMID33875891	Brain MRI	Regional and tissue volume	Volume of presubiculum-body in the left hemisphere generated by subcortical volumetric sub-segmentation of the Hippocampal Subfields	preSubiculum-body	33875891	31968	0	0	European
HippSubfield_lh_volume_presubiculum_head_PMID33875891	Brain MRI	Regional and tissue volume	Volume of presubiculum-head in the left hemisphere generated by subcortical volumetric sub-segmentation of the Hippocampal Subfields	preSubiculum-head	33875891	31968	0	0	European
HippSubfield_lh_volume_subiculum_body_PMID33875891	Brain MRI	Regional and tissue volume	Volume of subiculum-body in the left hemisphere generated by subcortical volumetric sub-segmentation of the Hippocampal Subfields	Subiculum-body	33875891	31968	0	0	European
HippSubfield_lh_volume_subiculum_head_PMID33875891	Brain MRI	Regional and tissue volume	Volume of subiculum-head in the left hemisphere generated by subcortical volumetric sub-segmentation of the Hippocampal Subfields	Subiculum-head	33875891	31968	0	0	European
HippSubfield_lh_volume_Whole_hippocampal_body_PMID33875891	Brain MRI	Regional and tissue volume	Volume of Whole-hippocampal-body in the left hemisphere generated by subcortical volumetric sub-segmentation of the Hippocampal Subfields	Whole-Hippocampal-body	33875891	31968	0	0	European
HippSubfield_lh_volume_Whole_hippocampal_head_PMID33875891	Brain MRI	Regional and tissue volume	Volume of Whole-hippocampal-head in the left hemisphere generated by subcortical volumetric sub-segmentation of the Hippocampal Subfields	Whole-Hippocampal-head	33875891	31968	0	0	European
HippSubfield_lh_volume_Whole_hippocampus_PMID33875891	Brain MRI	Regional and tissue volume	Volume of Whole-hippocampus in the left hemisphere generated by subcortical volumetric sub-segmentation of the Hippocampal Subfields	Whole-Hippocampus	33875891	31968	0	0	European
HippSubfield_rh_volume_CA1_body_PMID33875891	Brain MRI	Regional and tissue volume	Volume of CA1-body in the right hemisphere generated by subcortical volumetric sub-segmentation of the Hippocampal Subfields	CA1-body	33875891	31968	0	0	European
HippSubfield_rh_volume_CA1_head_PMID33875891	Brain MRI	Regional and tissue volume	Volume of CA1-head in the right hemisphere generated by subcortical volumetric sub-segmentation of the Hippocampal Subfields	CA1-head	33875891	31968	0	0	European
HippSubfield_rh_volume_CA3_body_PMID33875891	Brain MRI	Regional and tissue volume	Volume of CA3-body in the right hemisphere generated by subcortical volumetric sub-segmentation of the Hippocampal Subfields	CA3-body	33875891	31968	0	0	European
HippSubfield_rh_volume_CA3_head_PMID33875891	Brain MRI	Regional and tissue volume	Volume of CA3-head in the right hemisphere generated by subcortical volumetric sub-segmentation of the Hippocampal Subfields	CA3-head	33875891	31968	0	0	European
HippSubfield_rh_volume_CA4_body_PMID33875891	Brain MRI	Regional and tissue volume	Volume of CA4-body in the right hemisphere generated by subcortical volumetric sub-segmentation of the Hippocampal Subfields	CA4-body	33875891	31968	0	0	European
HippSubfield_rh_volume_CA4_head_PMID33875891	Brain MRI	Regional and tissue volume	Volume of CA4-head in the right hemisphere generated by subcortical volumetric sub-segmentation of the Hippocampal Subfields	CA4-head	33875891	31968	0	0	European
HippSubfield_rh_volume_fimbria_PMID33875891	Brain MRI	Regional and tissue volume	Volume of fimbria in the right hemisphere generated by subcortical volumetric sub-segmentation of the Hippocampal Subfields	Fimbria	33875891	31968	0	0	European
HippSubfield_rh_volume_GC_ML_DG_body_PMID33875891	Brain MRI	Regional and tissue volume	Volume of GC-ML-DG-body in the right hemisphere generated by subcortical volumetric sub-segmentation of the Hippocampal Subfields	GC-ML-DG-body	33875891	31968	0	0	European
HippSubfield_rh_volume_GC_ML_DG_head_PMID33875891	Brain MRI	Regional and tissue volume	Volume of GC-ML-DG-head in the right hemisphere generated by subcortical volumetric sub-segmentation of the Hippocampal Subfields	GC-ML-DG-head	33875891	31968	0	0	European
HippSubfield_rh_volume_HATA_PMID33875891	Brain MRI	Regional and tissue volume	Volume of HATA in the right hemisphere generated by subcortical volumetric sub-segmentation of the Hippocampal Subfields	HATA	33875891	31968	0	0	European
HippSubfield_rh_volume_hippocampal_fissure_PMID33875891	Brain MRI	Regional and tissue volume	Volume of hippocampal-fissure in the right hemisphere generated by subcortical volumetric sub-segmentation of the Hippocampal Subfields	Hippocampal-fissure	33875891	31968	0	0	European
HippSubfield_rh_volume_Hippocampal_tail_PMID33875891	Brain MRI	Regional and tissue volume	Volume of Hippocampal-tail in the right hemisphere generated by subcortical volumetric sub-segmentation of the Hippocampal Subfields	Hippocampal-tail	33875891	31968	0	0	European
HippSubfield_rh_volume_molecular_layer_HP_body_PMID33875891	Brain MRI	Regional and tissue volume	Volume of molecular-layer-HP-body in the right hemisphere generated by subcortical volumetric sub-segmentation of the Hippocampal Subfields	Molecular-layer-HP-body	33875891	31968	0	0	European
HippSubfield_rh_volume_molecular_layer_HP_head_PMID33875891	Brain MRI	Regional and tissue volume	Volume of molecular-layer-HP-head in the right hemisphere generated by subcortical volumetric sub-segmentation of the Hippocampal Subfields	Molecular-layer-HP-head	33875891	31968	0	0	European
HippSubfield_rh_volume_parasubiculum_PMID33875891	Brain MRI	Regional and tissue volume	Volume of parasubiculum in the right hemisphere generated by subcortical volumetric sub-segmentation of the Hippocampal Subfields	ParaSubiculum	33875891	31968	0	0	European
HippSubfield_rh_volume_presubiculum_body_PMID33875891	Brain MRI	Regional and tissue volume	Volume of presubiculum-body in the right hemisphere generated by subcortical volumetric sub-segmentation of the Hippocampal Subfields	preSubiculum-body	33875891	31968	0	0	European
HippSubfield_rh_volume_presubiculum_head_PMID33875891	Brain MRI	Regional and tissue volume	Volume of presubiculum-head in the right hemisphere generated by subcortical volumetric sub-segmentation of the Hippocampal Subfields	preSubiculum-head	33875891	31968	0	0	European
HippSubfield_rh_volume_subiculum_body_PMID33875891	Brain MRI	Regional and tissue volume	Volume of subiculum-body in the right hemisphere generated by subcortical volumetric sub-segmentation of the Hippocampal Subfields	Subiculum-body	33875891	31968	0	0	European
HippSubfield_rh_volume_subiculum_head_PMID33875891	Brain MRI	Regional and tissue volume	Volume of subiculum-head in the right hemisphere generated by subcortical volumetric sub-segmentation of the Hippocampal Subfields	Subiculum-head	33875891	31968	0	0	European
HippSubfield_rh_volume_Whole_hippocampal_body_PMID33875891	Brain MRI	Regional and tissue volume	Volume of Whole-hippocampal-body in the right hemisphere generated by subcortical volumetric sub-segmentation of the Hippocampal Subfields	Whole-Hippocampal-body	33875891	31968	0	0	European
HippSubfield_rh_volume_Whole_hippocampal_head_PMID33875891	Brain MRI	Regional and tissue volume	Volume of Whole-hippocampal-head in the right hemisphere generated by subcortical volumetric sub-segmentation of the Hippocampal Subfields	Whole-Hippocampal-head	33875891	31968	0	0	European
HippSubfield_rh_volume_Whole_hippocampus_PMID33875891	Brain MRI	Regional and tissue volume	Volume of Whole-hippocampus in the right hemisphere generated by subcortical volumetric sub-segmentation of the Hippocampal Subfields	Whole-Hippocampus	33875891	31968	0	0	European
IDP_dMRI_ProbtrackX_FA_ar_l_PMID33875891	Brain dMRI	WM tract FA	Weighted-mean FA (fractional anisotropy) in tract left acoustic radiation (from dMRI data)	Tract acoustic radiation	33875891	31355	0	0	European
IDP_dMRI_ProbtrackX_FA_ar_r_PMID33875891	Brain dMRI	WM tract FA	Weighted-mean FA (fractional anisotropy) in tract right acoustic radiation (from dMRI data)	Tract acoustic radiation	33875891	31355	0	0	European
IDP_dMRI_ProbtrackX_FA_atr_l_PMID33875891	Brain dMRI	WM tract FA	Weighted-mean FA (fractional anisotropy) in tract left anterior thalamic radiation (from dMRI data)	Tract Anterior thalamic radiation	33875891	31355	0	0	European
IDP_dMRI_ProbtrackX_FA_atr_r_PMID33875891	Brain dMRI	WM tract FA	Weighted-mean FA (fractional anisotropy) in tract right anterior thalamic radiation (from dMRI data)	Tract Anterior thalamic radiation	33875891	31355	0	0	European
IDP_dMRI_ProbtrackX_FA_cgc_l_PMID33875891	Brain dMRI	WM tract FA	Weighted-mean FA (fractional anisotropy) in tract left cingulate gyrus part of cingulum (from dMRI data)	Tract Cingulate gyrus part of Cingulum	33875891	31355	0	0	European
IDP_dMRI_ProbtrackX_FA_cgc_r_PMID33875891	Brain dMRI	WM tract FA	Weighted-mean FA (fractional anisotropy) in tract right cingulate gyrus part of cingulum (from dMRI data)	Tract Cingulate gyrus part of Cingulum	33875891	31355	0	0	European
IDP_dMRI_ProbtrackX_FA_cgh_l_PMID33875891	Brain dMRI	WM tract FA	Weighted-mean FA (fractional anisotropy) in tract left parahippocampal part of cingulum (from dMRI data)	Tract ParaHippocampal part of Cingulum	33875891	31355	0	0	European
IDP_dMRI_ProbtrackX_FA_cgh_r_PMID33875891	Brain dMRI	WM tract FA	Weighted-mean FA (fractional anisotropy) in tract right parahippocampal part of cingulum (from dMRI data)	Tract ParaHippocampal part of Cingulum	33875891	31355	0	0	European
IDP_dMRI_ProbtrackX_FA_cst_l_PMID33875891	Brain dMRI	WM tract FA	Weighted-mean FA (fractional anisotropy) in tract left corticospinal tract (from dMRI data)	Tract Corticospinal tract	33875891	31355	0	0	European
IDP_dMRI_ProbtrackX_FA_cst_r_PMID33875891	Brain dMRI	WM tract FA	Weighted-mean FA (fractional anisotropy) in tract right corticospinal tract (from dMRI data)	Tract Corticospinal tract	33875891	31355	0	0	European
IDP_dMRI_ProbtrackX_FA_fma_PMID33875891	Brain dMRI	WM tract FA	Weighted-mean FA (fractional anisotropy) in tract forceps major (from dMRI data)	Tract forceps major	33875891	31355	0	0	European
IDP_dMRI_ProbtrackX_FA_fmi_PMID33875891	Brain dMRI	WM tract FA	Weighted-mean FA (fractional anisotropy) in tract forceps minor (from dMRI data)	Tract forceps minor	33875891	31355	0	0	European
IDP_dMRI_ProbtrackX_FA_ifo_l_PMID33875891	Brain dMRI	WM tract FA	Weighted-mean FA (fractional anisotropy) in tract left inferior fronto-occipital fasciculus (from dMRI data)	Tract Inferior fronto-occipital fasciculus	33875891	31355	0	0	European
IDP_dMRI_ProbtrackX_FA_ifo_r_PMID33875891	Brain dMRI	WM tract FA	Weighted-mean FA (fractional anisotropy) in tract right inferior fronto-occipital fasciculus (from dMRI data)	Tract Inferior fronto-occipital fasciculus	33875891	31355	0	0	European
IDP_dMRI_ProbtrackX_FA_ilf_l_PMID33875891	Brain dMRI	WM tract FA	Weighted-mean FA (fractional anisotropy) in tract left inferior longitudinal fasciculus (from dMRI data)	Tract Inferior longitudinal fasciculus	33875891	31355	0	0	European
IDP_dMRI_ProbtrackX_FA_ilf_r_PMID33875891	Brain dMRI	WM tract FA	Weighted-mean FA (fractional anisotropy) in tract right inferior longitudinal fasciculus (from dMRI data)	Tract Inferior longitudinal fasciculus	33875891	31355	0	0	European
IDP_dMRI_ProbtrackX_FA_mcp_PMID33875891	Brain dMRI	WM tract FA	Weighted-mean FA (fractional anisotropy) in tract middle cerebellar peduncle (from dMRI data)	Tract Middle cerebellar peduncle	33875891	31355	0	0	European
IDP_dMRI_ProbtrackX_FA_ml_l_PMID33875891	Brain dMRI	WM tract FA	Weighted-mean FA (fractional anisotropy) in tract left medial lemniscus (from dMRI data)	Tract Medial lemniscus	33875891	31355	0	0	European
IDP_dMRI_ProbtrackX_FA_ml_r_PMID33875891	Brain dMRI	WM tract FA	Weighted-mean FA (fractional anisotropy) in tract right medial lemniscus (from dMRI data)	Tract Medial lemniscus	33875891	31355	0	0	European
IDP_dMRI_ProbtrackX_FA_ptr_l_PMID33875891	Brain dMRI	WM tract FA	Weighted-mean FA (fractional anisotropy) in tract left posterior thalamic radiation (from dMRI data)	Tract Posterior thalamic radiation	33875891	31355	0	0	European
IDP_dMRI_ProbtrackX_FA_ptr_r_PMID33875891	Brain dMRI	WM tract FA	Weighted-mean FA (fractional anisotropy) in tract right posterior thalamic radiation (from dMRI data)	Tract Posterior thalamic radiation	33875891	31355	0	0	European
IDP_dMRI_ProbtrackX_FA_slf_l_PMID33875891	Brain dMRI	WM tract FA	Weighted-mean FA (fractional anisotropy) in tract left superior longitudinal fasciculus (from dMRI data)	Tract Superior longitudinal fasciculus	33875891	31355	0	0	European
IDP_dMRI_ProbtrackX_FA_slf_r_PMID33875891	Brain dMRI	WM tract FA	Weighted-mean FA (fractional anisotropy) in tract right superior longitudinal fasciculus (from dMRI data)	Tract Superior longitudinal fasciculus	33875891	31355	0	0	European
IDP_dMRI_ProbtrackX_FA_str_l_PMID33875891	Brain dMRI	WM tract FA	Weighted-mean FA (fractional anisotropy) in tract left superior thalamic radiation (from dMRI data)	Tract Superior thalamic radiation	33875891	31355	0	0	European
IDP_dMRI_ProbtrackX_FA_str_r_PMID33875891	Brain dMRI	WM tract FA	Weighted-mean FA (fractional anisotropy) in tract right superior thalamic radiation (from dMRI data)	Tract Superior thalamic radiation	33875891	31355	0	0	European
IDP_dMRI_ProbtrackX_FA_unc_l_PMID33875891	Brain dMRI	WM tract FA	Weighted-mean FA (fractional anisotropy) in tract left uncinate fasciculus (from dMRI data)	Tract Uncinate fasciculus	33875891	31355	0	0	European
IDP_dMRI_ProbtrackX_FA_unc_r_PMID33875891	Brain dMRI	WM tract FA	Weighted-mean FA (fractional anisotropy) in tract right uncinate fasciculus (from dMRI data)	Tract Uncinate fasciculus	33875891	31355	0	0	European
IDP_dMRI_ProbtrackX_ICVF_ar_l_PMID33875891	Brain dMRI	WM tract ICVF	Weighted-mean ICVF (intra-cellular volume fraction) in tract left acoustic radiation (from dMRI data)	Tract acoustic radiation	33875891	31354	0	0	European
IDP_dMRI_ProbtrackX_ICVF_ar_r_PMID33875891	Brain dMRI	WM tract ICVF	Weighted-mean ICVF (intra-cellular volume fraction) in tract right acoustic radiation (from dMRI data)	Tract acoustic radiation	33875891	31354	0	0	European
IDP_dMRI_ProbtrackX_ICVF_atr_l_PMID33875891	Brain dMRI	WM tract ICVF	Weighted-mean ICVF (intra-cellular volume fraction) in tract left anterior thalamic radiation (from dMRI data)	Tract Anterior thalamic radiation	33875891	31354	0	0	European
IDP_dMRI_ProbtrackX_ICVF_atr_r_PMID33875891	Brain dMRI	WM tract ICVF	Weighted-mean ICVF (intra-cellular volume fraction) in tract right anterior thalamic radiation (from dMRI data)	Tract Anterior thalamic radiation	33875891	31354	0	0	European
IDP_dMRI_ProbtrackX_ICVF_cgc_l_PMID33875891	Brain dMRI	WM tract ICVF	Weighted-mean ICVF (intra-cellular volume fraction) in tract left cingulate gyrus part of cingulum (from dMRI data)	Tract Cingulate gyrus part of Cingulum	33875891	31354	0	0	European
IDP_dMRI_ProbtrackX_ICVF_cgc_r_PMID33875891	Brain dMRI	WM tract ICVF	Weighted-mean ICVF (intra-cellular volume fraction) in tract right cingulate gyrus part of cingulum (from dMRI data)	Tract Cingulate gyrus part of Cingulum	33875891	31354	0	0	European
IDP_dMRI_ProbtrackX_ICVF_cgh_l_PMID33875891	Brain dMRI	WM tract ICVF	Weighted-mean ICVF (intra-cellular volume fraction) in tract left parahippocampal part of cingulum (from dMRI data)	Tract ParaHippocampal part of Cingulum	33875891	31354	0	0	European
IDP_dMRI_ProbtrackX_ICVF_cgh_r_PMID33875891	Brain dMRI	WM tract ICVF	Weighted-mean ICVF (intra-cellular volume fraction) in tract right parahippocampal part of cingulum (from dMRI data)	Tract ParaHippocampal part of Cingulum	33875891	31354	0	0	European
IDP_dMRI_ProbtrackX_ICVF_cst_l_PMID33875891	Brain dMRI	WM tract ICVF	Weighted-mean ICVF (intra-cellular volume fraction) in tract left corticospinal tract (from dMRI data)	Tract Corticospinal tract	33875891	31354	0	0	European
IDP_dMRI_ProbtrackX_ICVF_cst_r_PMID33875891	Brain dMRI	WM tract ICVF	Weighted-mean ICVF (intra-cellular volume fraction) in tract right corticospinal tract (from dMRI data)	Tract Corticospinal tract	33875891	31354	0	0	European
IDP_dMRI_ProbtrackX_ICVF_fma_PMID33875891	Brain dMRI	WM tract ICVF	Weighted-mean ICVF (intra-cellular volume fraction) in tract forceps major (from dMRI data)	Tract forceps major	33875891	31354	0	0	European
IDP_dMRI_ProbtrackX_ICVF_fmi_PMID33875891	Brain dMRI	WM tract ICVF	Weighted-mean ICVF (intra-cellular volume fraction) in tract forceps minor (from dMRI data)	Tract forceps minor	33875891	31354	0	0	European
IDP_dMRI_ProbtrackX_ICVF_ifo_l_PMID33875891	Brain dMRI	WM tract ICVF	Weighted-mean ICVF (intra-cellular volume fraction) in tract left inferior fronto-occipital fasciculus (from dMRI data)	Tract Inferior fronto-occipital fasciculus	33875891	31354	0	0	European
IDP_dMRI_ProbtrackX_ICVF_ifo_r_PMID33875891	Brain dMRI	WM tract ICVF	Weighted-mean ICVF (intra-cellular volume fraction) in tract right inferior fronto-occipital fasciculus (from dMRI data)	Tract Inferior fronto-occipital fasciculus	33875891	31354	0	0	European
IDP_dMRI_ProbtrackX_ICVF_ilf_l_PMID33875891	Brain dMRI	WM tract ICVF	Weighted-mean ICVF (intra-cellular volume fraction) in tract left inferior longitudinal fasciculus (from dMRI data)	Tract Inferior longitudinal fasciculus	33875891	31354	0	0	European
IDP_dMRI_ProbtrackX_ICVF_ilf_r_PMID33875891	Brain dMRI	WM tract ICVF	Weighted-mean ICVF (intra-cellular volume fraction) in tract right inferior longitudinal fasciculus (from dMRI data)	Tract Inferior longitudinal fasciculus	33875891	31354	0	0	European
IDP_dMRI_ProbtrackX_ICVF_mcp_PMID33875891	Brain dMRI	WM tract ICVF	Weighted-mean ICVF (intra-cellular volume fraction) in tract middle cerebellar peduncle (from dMRI data)	Tract Middle cerebellar peduncle	33875891	31354	0	0	European
IDP_dMRI_ProbtrackX_ICVF_ml_l_PMID33875891	Brain dMRI	WM tract ICVF	Weighted-mean ICVF (intra-cellular volume fraction) in tract left medial lemniscus (from dMRI data)	Tract Medial lemniscus	33875891	31354	0	0	European
IDP_dMRI_ProbtrackX_ICVF_ml_r_PMID33875891	Brain dMRI	WM tract ICVF	Weighted-mean ICVF (intra-cellular volume fraction) in tract right medial lemniscus (from dMRI data)	Tract Medial lemniscus	33875891	31354	0	0	European
IDP_dMRI_ProbtrackX_ICVF_ptr_l_PMID33875891	Brain dMRI	WM tract ICVF	Weighted-mean ICVF (intra-cellular volume fraction) in tract left posterior thalamic radiation (from dMRI data)	Tract Posterior thalamic radiation	33875891	31354	0	0	European
IDP_dMRI_ProbtrackX_ICVF_ptr_r_PMID33875891	Brain dMRI	WM tract ICVF	Weighted-mean ICVF (intra-cellular volume fraction) in tract right posterior thalamic radiation (from dMRI data)	Tract Posterior thalamic radiation	33875891	31354	0	0	European
IDP_dMRI_ProbtrackX_ICVF_slf_l_PMID33875891	Brain dMRI	WM tract ICVF	Weighted-mean ICVF (intra-cellular volume fraction) in tract left superior longitudinal fasciculus (from dMRI data)	Tract Superior longitudinal fasciculus	33875891	31354	0	0	European
IDP_dMRI_ProbtrackX_ICVF_slf_r_PMID33875891	Brain dMRI	WM tract ICVF	Weighted-mean ICVF (intra-cellular volume fraction) in tract right superior longitudinal fasciculus (from dMRI data)	Tract Superior longitudinal fasciculus	33875891	31354	0	0	European
IDP_dMRI_ProbtrackX_ICVF_str_l_PMID33875891	Brain dMRI	WM tract ICVF	Weighted-mean ICVF (intra-cellular volume fraction) in tract left superior thalamic radiation (from dMRI data)	Tract Superior thalamic radiation	33875891	31354	0	0	European
IDP_dMRI_ProbtrackX_ICVF_str_r_PMID33875891	Brain dMRI	WM tract ICVF	Weighted-mean ICVF (intra-cellular volume fraction) in tract right superior thalamic radiation (from dMRI data)	Tract Superior thalamic radiation	33875891	31354	0	0	European
IDP_dMRI_ProbtrackX_ICVF_unc_l_PMID33875891	Brain dMRI	WM tract ICVF	Weighted-mean ICVF (intra-cellular volume fraction) in tract left uncinate fasciculus (from dMRI data)	Tract Uncinate fasciculus	33875891	31354	0	0	European
IDP_dMRI_ProbtrackX_ICVF_unc_r_PMID33875891	Brain dMRI	WM tract ICVF	Weighted-mean ICVF (intra-cellular volume fraction) in tract right uncinate fasciculus (from dMRI data)	Tract Uncinate fasciculus	33875891	31354	0	0	European
IDP_dMRI_ProbtrackX_ISOVF_ar_l_PMID33875891	Brain dMRI	WM tract ISOVF	Weighted-mean ISOVF (isotropic or free water volume fraction) in tract left acoustic radiation (from dMRI data)	Tract acoustic radiation	33875891	31354	0	0	European
IDP_dMRI_ProbtrackX_ISOVF_ar_r_PMID33875891	Brain dMRI	WM tract ISOVF	Weighted-mean ISOVF (isotropic or free water volume fraction) in tract right acoustic radiation (from dMRI data)	Tract acoustic radiation	33875891	31354	0	0	European
IDP_dMRI_ProbtrackX_ISOVF_atr_l_PMID33875891	Brain dMRI	WM tract ISOVF	Weighted-mean ISOVF (isotropic or free water volume fraction) in tract left anterior thalamic radiation (from dMRI data)	Tract Anterior thalamic radiation	33875891	31354	0	0	European
IDP_dMRI_ProbtrackX_ISOVF_atr_r_PMID33875891	Brain dMRI	WM tract ISOVF	Weighted-mean ISOVF (isotropic or free water volume fraction) in tract right anterior thalamic radiation (from dMRI data)	Tract Anterior thalamic radiation	33875891	31354	0	0	European
IDP_dMRI_ProbtrackX_ISOVF_cgc_l_PMID33875891	Brain dMRI	WM tract ISOVF	Weighted-mean ISOVF (isotropic or free water volume fraction) in tract left cingulate gyrus part of cingulum (from dMRI data)	Tract Cingulate gyrus part of Cingulum	33875891	31354	0	0	European
IDP_dMRI_ProbtrackX_ISOVF_cgc_r_PMID33875891	Brain dMRI	WM tract ISOVF	Weighted-mean ISOVF (isotropic or free water volume fraction) in tract right cingulate gyrus part of cingulum (from dMRI data)	Tract Cingulate gyrus part of Cingulum	33875891	31354	0	0	European
IDP_dMRI_ProbtrackX_ISOVF_cgh_l_PMID33875891	Brain dMRI	WM tract ISOVF	Weighted-mean ISOVF (isotropic or free water volume fraction) in tract left parahippocampal part of cingulum (from dMRI data)	Tract ParaHippocampal part of Cingulum	33875891	31354	0	0	European
IDP_dMRI_ProbtrackX_ISOVF_cgh_r_PMID33875891	Brain dMRI	WM tract ISOVF	Weighted-mean ISOVF (isotropic or free water volume fraction) in tract right parahippocampal part of cingulum (from dMRI data)	Tract ParaHippocampal part of Cingulum	33875891	31354	0	0	European
IDP_dMRI_ProbtrackX_ISOVF_cst_l_PMID33875891	Brain dMRI	WM tract ISOVF	Weighted-mean ISOVF (isotropic or free water volume fraction) in tract left corticospinal tract (from dMRI data)	Tract Corticospinal tract	33875891	31354	0	0	European
IDP_dMRI_ProbtrackX_ISOVF_cst_r_PMID33875891	Brain dMRI	WM tract ISOVF	Weighted-mean ISOVF (isotropic or free water volume fraction) in tract right corticospinal tract (from dMRI data)	Tract Corticospinal tract	33875891	31354	0	0	European
IDP_dMRI_ProbtrackX_ISOVF_fma_PMID33875891	Brain dMRI	WM tract ISOVF	Weighted-mean ISOVF (isotropic or free water volume fraction) in tract forceps major (from dMRI data)	Tract forceps major	33875891	31354	0	0	European
IDP_dMRI_ProbtrackX_ISOVF_fmi_PMID33875891	Brain dMRI	WM tract ISOVF	Weighted-mean ISOVF (isotropic or free water volume fraction) in tract forceps minor (from dMRI data)	Tract forceps minor	33875891	31354	0	0	European
IDP_dMRI_ProbtrackX_ISOVF_ifo_l_PMID33875891	Brain dMRI	WM tract ISOVF	Weighted-mean ISOVF (isotropic or free water volume fraction) in tract left inferior fronto-occipital fasciculus (from dMRI data)	Tract Inferior fronto-occipital fasciculus	33875891	31354	0	0	European
IDP_dMRI_ProbtrackX_ISOVF_ifo_r_PMID33875891	Brain dMRI	WM tract ISOVF	Weighted-mean ISOVF (isotropic or free water volume fraction) in tract right inferior fronto-occipital fasciculus (from dMRI data)	Tract Inferior fronto-occipital fasciculus	33875891	31354	0	0	European
IDP_dMRI_ProbtrackX_ISOVF_ilf_l_PMID33875891	Brain dMRI	WM tract ISOVF	Weighted-mean ISOVF (isotropic or free water volume fraction) in tract left inferior longitudinal fasciculus (from dMRI data)	Tract Inferior longitudinal fasciculus	33875891	31354	0	0	European
IDP_dMRI_ProbtrackX_ISOVF_ilf_r_PMID33875891	Brain dMRI	WM tract ISOVF	Weighted-mean ISOVF (isotropic or free water volume fraction) in tract right inferior longitudinal fasciculus (from dMRI data)	Tract Inferior longitudinal fasciculus	33875891	31354	0	0	European
IDP_dMRI_ProbtrackX_ISOVF_mcp_PMID33875891	Brain dMRI	WM tract ISOVF	Weighted-mean ISOVF (isotropic or free water volume fraction) in tract middle cerebellar peduncle (from dMRI data)	Tract Middle cerebellar peduncle	33875891	31354	0	0	European
IDP_dMRI_ProbtrackX_ISOVF_ml_l_PMID33875891	Brain dMRI	WM tract ISOVF	Weighted-mean ISOVF (isotropic or free water volume fraction) in tract left medial lemniscus (from dMRI data)	Tract Medial lemniscus	33875891	31354	0	0	European
IDP_dMRI_ProbtrackX_ISOVF_ml_r_PMID33875891	Brain dMRI	WM tract ISOVF	Weighted-mean ISOVF (isotropic or free water volume fraction) in tract right medial lemniscus (from dMRI data)	Tract Medial lemniscus	33875891	31354	0	0	European
IDP_dMRI_ProbtrackX_ISOVF_ptr_l_PMID33875891	Brain dMRI	WM tract ISOVF	Weighted-mean ISOVF (isotropic or free water volume fraction) in tract left posterior thalamic radiation (from dMRI data)	Tract Posterior thalamic radiation	33875891	31354	0	0	European
IDP_dMRI_ProbtrackX_ISOVF_ptr_r_PMID33875891	Brain dMRI	WM tract ISOVF	Weighted-mean ISOVF (isotropic or free water volume fraction) in tract right posterior thalamic radiation (from dMRI data)	Tract Posterior thalamic radiation	33875891	31354	0	0	European
IDP_dMRI_ProbtrackX_ISOVF_slf_l_PMID33875891	Brain dMRI	WM tract ISOVF	Weighted-mean ISOVF (isotropic or free water volume fraction) in tract left superior longitudinal fasciculus (from dMRI data)	Tract Superior longitudinal fasciculus	33875891	31354	0	0	European
IDP_dMRI_ProbtrackX_ISOVF_slf_r_PMID33875891	Brain dMRI	WM tract ISOVF	Weighted-mean ISOVF (isotropic or free water volume fraction) in tract right superior longitudinal fasciculus (from dMRI data)	Tract Superior longitudinal fasciculus	33875891	31354	0	0	European
IDP_dMRI_ProbtrackX_ISOVF_str_l_PMID33875891	Brain dMRI	WM tract ISOVF	Weighted-mean ISOVF (isotropic or free water volume fraction) in tract left superior thalamic radiation (from dMRI data)	Tract Superior thalamic radiation	33875891	31354	0	0	European
IDP_dMRI_ProbtrackX_ISOVF_str_r_PMID33875891	Brain dMRI	WM tract ISOVF	Weighted-mean ISOVF (isotropic or free water volume fraction) in tract right superior thalamic radiation (from dMRI data)	Tract Superior thalamic radiation	33875891	31354	0	0	European
IDP_dMRI_ProbtrackX_ISOVF_unc_l_PMID33875891	Brain dMRI	WM tract ISOVF	Weighted-mean ISOVF (isotropic or free water volume fraction) in tract left uncinate fasciculus (from dMRI data)	Tract Uncinate fasciculus	33875891	31354	0	0	European
IDP_dMRI_ProbtrackX_ISOVF_unc_r_PMID33875891	Brain dMRI	WM tract ISOVF	Weighted-mean ISOVF (isotropic or free water volume fraction) in tract right uncinate fasciculus (from dMRI data)	Tract Uncinate fasciculus	33875891	31354	0	0	European
IDP_dMRI_ProbtrackX_L1_ar_l_PMID33875891	Brain dMRI	WM tract diffusivity	Weighted-mean L1 in tract left acoustic radiation (from dMRI data)	Tract acoustic radiation	33875891	31355	0	0	European
IDP_dMRI_ProbtrackX_L1_ar_r_PMID33875891	Brain dMRI	WM tract diffusivity	Weighted-mean L1 in tract right acoustic radiation (from dMRI data)	Tract acoustic radiation	33875891	31355	0	0	European
IDP_dMRI_ProbtrackX_L1_atr_l_PMID33875891	Brain dMRI	WM tract diffusivity	Weighted-mean L1 in tract left anterior thalamic radiation (from dMRI data)	Tract Anterior thalamic radiation	33875891	31355	0	0	European
IDP_dMRI_ProbtrackX_L1_atr_r_PMID33875891	Brain dMRI	WM tract diffusivity	Weighted-mean L1 in tract right anterior thalamic radiation (from dMRI data)	Tract Anterior thalamic radiation	33875891	31355	0	0	European
IDP_dMRI_ProbtrackX_L1_cgc_l_PMID33875891	Brain dMRI	WM tract diffusivity	Weighted-mean L1 in tract left cingulate gyrus part of cingulum (from dMRI data)	Tract Cingulate gyrus part of Cingulum	33875891	31355	0	0	European
IDP_dMRI_ProbtrackX_L1_cgc_r_PMID33875891	Brain dMRI	WM tract diffusivity	Weighted-mean L1 in tract right cingulate gyrus part of cingulum (from dMRI data)	Tract Cingulate gyrus part of Cingulum	33875891	31355	0	0	European
IDP_dMRI_ProbtrackX_L1_cgh_l_PMID33875891	Brain dMRI	WM tract diffusivity	Weighted-mean L1 in tract left parahippocampal part of cingulum (from dMRI data)	Tract ParaHippocampal part of Cingulum	33875891	31355	0	0	European
IDP_dMRI_ProbtrackX_L1_cgh_r_PMID33875891	Brain dMRI	WM tract diffusivity	Weighted-mean L1 in tract right parahippocampal part of cingulum (from dMRI data)	Tract ParaHippocampal part of Cingulum	33875891	31355	0	0	European
IDP_dMRI_ProbtrackX_L1_cst_l_PMID33875891	Brain dMRI	WM tract diffusivity	Weighted-mean L1 in tract left corticospinal tract (from dMRI data)	Tract Corticospinal tract	33875891	31355	0	0	European
IDP_dMRI_ProbtrackX_L1_cst_r_PMID33875891	Brain dMRI	WM tract diffusivity	Weighted-mean L1 in tract right corticospinal tract (from dMRI data)	Tract Corticospinal tract	33875891	31355	0	0	European
IDP_dMRI_ProbtrackX_L1_fma_PMID33875891	Brain dMRI	WM tract diffusivity	Weighted-mean L1 in tract forceps major (from dMRI data)	Tract forceps major	33875891	31355	0	0	European
IDP_dMRI_ProbtrackX_L1_fmi_PMID33875891	Brain dMRI	WM tract diffusivity	Weighted-mean L1 in tract forceps minor (from dMRI data)	Tract forceps minor	33875891	31355	0	0	European
IDP_dMRI_ProbtrackX_L1_ifo_l_PMID33875891	Brain dMRI	WM tract diffusivity	Weighted-mean L1 in tract left inferior fronto-occipital fasciculus (from dMRI data)	Tract Inferior fronto-occipital fasciculus	33875891	31355	0	0	European
IDP_dMRI_ProbtrackX_L1_ifo_r_PMID33875891	Brain dMRI	WM tract diffusivity	Weighted-mean L1 in tract right inferior fronto-occipital fasciculus (from dMRI data)	Tract Inferior fronto-occipital fasciculus	33875891	31355	0	0	European
IDP_dMRI_ProbtrackX_L1_ilf_l_PMID33875891	Brain dMRI	WM tract diffusivity	Weighted-mean L1 in tract left inferior longitudinal fasciculus (from dMRI data)	Tract Inferior longitudinal fasciculus	33875891	31355	0	0	European
IDP_dMRI_ProbtrackX_L1_ilf_r_PMID33875891	Brain dMRI	WM tract diffusivity	Weighted-mean L1 in tract right inferior longitudinal fasciculus (from dMRI data)	Tract Inferior longitudinal fasciculus	33875891	31355	0	0	European
IDP_dMRI_ProbtrackX_L1_mcp_PMID33875891	Brain dMRI	WM tract diffusivity	Weighted-mean L1 in tract middle cerebellar peduncle (from dMRI data)	Tract Middle cerebellar peduncle	33875891	31355	0	0	European
IDP_dMRI_ProbtrackX_L1_ml_l_PMID33875891	Brain dMRI	WM tract diffusivity	Weighted-mean L1 in tract left medial lemniscus (from dMRI data)	Tract Medial lemniscus	33875891	31355	0	0	European
IDP_dMRI_ProbtrackX_L1_ml_r_PMID33875891	Brain dMRI	WM tract diffusivity	Weighted-mean L1 in tract right medial lemniscus (from dMRI data)	Tract Medial lemniscus	33875891	31355	0	0	European
IDP_dMRI_ProbtrackX_L1_ptr_l_PMID33875891	Brain dMRI	WM tract diffusivity	Weighted-mean L1 in tract left posterior thalamic radiation (from dMRI data)	Tract Posterior thalamic radiation	33875891	31355	0	0	European
IDP_dMRI_ProbtrackX_L1_ptr_r_PMID33875891	Brain dMRI	WM tract diffusivity	Weighted-mean L1 in tract right posterior thalamic radiation (from dMRI data)	Tract Posterior thalamic radiation	33875891	31355	0	0	European
IDP_dMRI_ProbtrackX_L1_slf_l_PMID33875891	Brain dMRI	WM tract diffusivity	Weighted-mean L1 in tract left superior longitudinal fasciculus (from dMRI data)	Tract Superior longitudinal fasciculus	33875891	31355	0	0	European
IDP_dMRI_ProbtrackX_L1_slf_r_PMID33875891	Brain dMRI	WM tract diffusivity	Weighted-mean L1 in tract right superior longitudinal fasciculus (from dMRI data)	Tract Superior longitudinal fasciculus	33875891	31355	0	0	European
IDP_dMRI_ProbtrackX_L1_str_l_PMID33875891	Brain dMRI	WM tract diffusivity	Weighted-mean L1 in tract left superior thalamic radiation (from dMRI data)	Tract Superior thalamic radiation	33875891	31355	0	0	European
IDP_dMRI_ProbtrackX_L1_str_r_PMID33875891	Brain dMRI	WM tract diffusivity	Weighted-mean L1 in tract right superior thalamic radiation (from dMRI data)	Tract Superior thalamic radiation	33875891	31355	0	0	European
IDP_dMRI_ProbtrackX_L1_unc_l_PMID33875891	Brain dMRI	WM tract diffusivity	Weighted-mean L1 in tract left uncinate fasciculus (from dMRI data)	Tract Uncinate fasciculus	33875891	31355	0	0	European
IDP_dMRI_ProbtrackX_L1_unc_r_PMID33875891	Brain dMRI	WM tract diffusivity	Weighted-mean L1 in tract right uncinate fasciculus (from dMRI data)	Tract Uncinate fasciculus	33875891	31355	0	0	European
IDP_dMRI_ProbtrackX_L2_ar_l_PMID33875891	Brain dMRI	WM tract diffusivity	Weighted-mean L2 in tract left acoustic radiation (from dMRI data)	Tract acoustic radiation	33875891	31355	0	0	European
IDP_dMRI_ProbtrackX_L2_ar_r_PMID33875891	Brain dMRI	WM tract diffusivity	Weighted-mean L2 in tract right acoustic radiation (from dMRI data)	Tract acoustic radiation	33875891	31355	0	0	European
IDP_dMRI_ProbtrackX_L2_atr_l_PMID33875891	Brain dMRI	WM tract diffusivity	Weighted-mean L2 in tract left anterior thalamic radiation (from dMRI data)	Tract Anterior thalamic radiation	33875891	31355	0	0	European
IDP_dMRI_ProbtrackX_L2_atr_r_PMID33875891	Brain dMRI	WM tract diffusivity	Weighted-mean L2 in tract right anterior thalamic radiation (from dMRI data)	Tract Anterior thalamic radiation	33875891	31355	0	0	European
IDP_dMRI_ProbtrackX_L2_cgc_l_PMID33875891	Brain dMRI	WM tract diffusivity	Weighted-mean L2 in tract left cingulate gyrus part of cingulum (from dMRI data)	Tract Cingulate gyrus part of Cingulum	33875891	31355	0	0	European
IDP_dMRI_ProbtrackX_L2_cgc_r_PMID33875891	Brain dMRI	WM tract diffusivity	Weighted-mean L2 in tract right cingulate gyrus part of cingulum (from dMRI data)	Tract Cingulate gyrus part of Cingulum	33875891	31355	0	0	European
IDP_dMRI_ProbtrackX_L2_cgh_l_PMID33875891	Brain dMRI	WM tract diffusivity	Weighted-mean L2 in tract left parahippocampal part of cingulum (from dMRI data)	Tract ParaHippocampal part of Cingulum	33875891	31355	0	0	European
IDP_dMRI_ProbtrackX_L2_cgh_r_PMID33875891	Brain dMRI	WM tract diffusivity	Weighted-mean L2 in tract right parahippocampal part of cingulum (from dMRI data)	Tract ParaHippocampal part of Cingulum	33875891	31355	0	0	European
IDP_dMRI_ProbtrackX_L2_cst_l_PMID33875891	Brain dMRI	WM tract diffusivity	Weighted-mean L2 in tract left corticospinal tract (from dMRI data)	Tract Corticospinal tract	33875891	31355	0	0	European
IDP_dMRI_ProbtrackX_L2_cst_r_PMID33875891	Brain dMRI	WM tract diffusivity	Weighted-mean L2 in tract right corticospinal tract (from dMRI data)	Tract Corticospinal tract	33875891	31355	0	0	European
IDP_dMRI_ProbtrackX_L2_fma_PMID33875891	Brain dMRI	WM tract diffusivity	Weighted-mean L2 in tract forceps major (from dMRI data)	Tract forceps major	33875891	31355	0	0	European
IDP_dMRI_ProbtrackX_L2_fmi_PMID33875891	Brain dMRI	WM tract diffusivity	Weighted-mean L2 in tract forceps minor (from dMRI data)	Tract forceps minor	33875891	31355	0	0	European
IDP_dMRI_ProbtrackX_L2_ifo_l_PMID33875891	Brain dMRI	WM tract diffusivity	Weighted-mean L2 in tract left inferior fronto-occipital fasciculus (from dMRI data)	Tract Inferior fronto-occipital fasciculus	33875891	31355	0	0	European
IDP_dMRI_ProbtrackX_L2_ifo_r_PMID33875891	Brain dMRI	WM tract diffusivity	Weighted-mean L2 in tract right inferior fronto-occipital fasciculus (from dMRI data)	Tract Inferior fronto-occipital fasciculus	33875891	31355	0	0	European
IDP_dMRI_ProbtrackX_L2_ilf_l_PMID33875891	Brain dMRI	WM tract diffusivity	Weighted-mean L2 in tract left inferior longitudinal fasciculus (from dMRI data)	Tract Inferior longitudinal fasciculus	33875891	31355	0	0	European
IDP_dMRI_ProbtrackX_L2_ilf_r_PMID33875891	Brain dMRI	WM tract diffusivity	Weighted-mean L2 in tract right inferior longitudinal fasciculus (from dMRI data)	Tract Inferior longitudinal fasciculus	33875891	31355	0	0	European
IDP_dMRI_ProbtrackX_L2_mcp_PMID33875891	Brain dMRI	WM tract diffusivity	Weighted-mean L2 in tract middle cerebellar peduncle (from dMRI data)	Tract Middle cerebellar peduncle	33875891	31355	0	0	European
IDP_dMRI_ProbtrackX_L2_ml_l_PMID33875891	Brain dMRI	WM tract diffusivity	Weighted-mean L2 in tract left medial lemniscus (from dMRI data)	Tract Medial lemniscus	33875891	31355	0	0	European
IDP_dMRI_ProbtrackX_L2_ml_r_PMID33875891	Brain dMRI	WM tract diffusivity	Weighted-mean L2 in tract right medial lemniscus (from dMRI data)	Tract Medial lemniscus	33875891	31355	0	0	European
IDP_dMRI_ProbtrackX_L2_ptr_l_PMID33875891	Brain dMRI	WM tract diffusivity	Weighted-mean L2 in tract left posterior thalamic radiation (from dMRI data)	Tract Posterior thalamic radiation	33875891	31355	0	0	European
IDP_dMRI_ProbtrackX_L2_ptr_r_PMID33875891	Brain dMRI	WM tract diffusivity	Weighted-mean L2 in tract right posterior thalamic radiation (from dMRI data)	Tract Posterior thalamic radiation	33875891	31355	0	0	European
IDP_dMRI_ProbtrackX_L2_slf_l_PMID33875891	Brain dMRI	WM tract diffusivity	Weighted-mean L2 in tract left superior longitudinal fasciculus (from dMRI data)	Tract Superior longitudinal fasciculus	33875891	31355	0	0	European
IDP_dMRI_ProbtrackX_L2_slf_r_PMID33875891	Brain dMRI	WM tract diffusivity	Weighted-mean L2 in tract right superior longitudinal fasciculus (from dMRI data)	Tract Superior longitudinal fasciculus	33875891	31355	0	0	European
IDP_dMRI_ProbtrackX_L2_str_l_PMID33875891	Brain dMRI	WM tract diffusivity	Weighted-mean L2 in tract left superior thalamic radiation (from dMRI data)	Tract Superior thalamic radiation	33875891	31355	0	0	European
IDP_dMRI_ProbtrackX_L2_str_r_PMID33875891	Brain dMRI	WM tract diffusivity	Weighted-mean L2 in tract right superior thalamic radiation (from dMRI data)	Tract Superior thalamic radiation	33875891	31355	0	0	European
IDP_dMRI_ProbtrackX_L2_unc_l_PMID33875891	Brain dMRI	WM tract diffusivity	Weighted-mean L2 in tract left uncinate fasciculus (from dMRI data)	Tract Uncinate fasciculus	33875891	31355	0	0	European
IDP_dMRI_ProbtrackX_L2_unc_r_PMID33875891	Brain dMRI	WM tract diffusivity	Weighted-mean L2 in tract right uncinate fasciculus (from dMRI data)	Tract Uncinate fasciculus	33875891	31355	0	0	European
IDP_dMRI_ProbtrackX_L3_ar_l_PMID33875891	Brain dMRI	WM tract diffusivity	Weighted-mean L3 in tract left acoustic radiation (from dMRI data)	Tract acoustic radiation	33875891	31355	0	0	European
IDP_dMRI_ProbtrackX_L3_ar_r_PMID33875891	Brain dMRI	WM tract diffusivity	Weighted-mean L3 in tract right acoustic radiation (from dMRI data)	Tract acoustic radiation	33875891	31355	0	0	European
IDP_dMRI_ProbtrackX_L3_atr_l_PMID33875891	Brain dMRI	WM tract diffusivity	Weighted-mean L3 in tract left anterior thalamic radiation (from dMRI data)	Tract Anterior thalamic radiation	33875891	31355	0	0	European
IDP_dMRI_ProbtrackX_L3_atr_r_PMID33875891	Brain dMRI	WM tract diffusivity	Weighted-mean L3 in tract right anterior thalamic radiation (from dMRI data)	Tract Anterior thalamic radiation	33875891	31355	0	0	European
IDP_dMRI_ProbtrackX_L3_cgc_l_PMID33875891	Brain dMRI	WM tract diffusivity	Weighted-mean L3 in tract left cingulate gyrus part of cingulum (from dMRI data)	Tract Cingulate gyrus part of Cingulum	33875891	31355	0	0	European
IDP_dMRI_ProbtrackX_L3_cgc_r_PMID33875891	Brain dMRI	WM tract diffusivity	Weighted-mean L3 in tract right cingulate gyrus part of cingulum (from dMRI data)	Tract Cingulate gyrus part of Cingulum	33875891	31355	0	0	European
IDP_dMRI_ProbtrackX_L3_cgh_l_PMID33875891	Brain dMRI	WM tract diffusivity	Weighted-mean L3 in tract left parahippocampal part of cingulum (from dMRI data)	Tract ParaHippocampal part of Cingulum	33875891	31355	0	0	European
IDP_dMRI_ProbtrackX_L3_cgh_r_PMID33875891	Brain dMRI	WM tract diffusivity	Weighted-mean L3 in tract right parahippocampal part of cingulum (from dMRI data)	Tract ParaHippocampal part of Cingulum	33875891	31355	0	0	European
IDP_dMRI_ProbtrackX_L3_cst_l_PMID33875891	Brain dMRI	WM tract diffusivity	Weighted-mean L3 in tract left corticospinal tract (from dMRI data)	Tract Corticospinal tract	33875891	31355	0	0	European
IDP_dMRI_ProbtrackX_L3_cst_r_PMID33875891	Brain dMRI	WM tract diffusivity	Weighted-mean L3 in tract right corticospinal tract (from dMRI data)	Tract Corticospinal tract	33875891	31355	0	0	European
IDP_dMRI_ProbtrackX_L3_fma_PMID33875891	Brain dMRI	WM tract diffusivity	Weighted-mean L3 in tract forceps major (from dMRI data)	Tract forceps major	33875891	31355	0	0	European
IDP_dMRI_ProbtrackX_L3_fmi_PMID33875891	Brain dMRI	WM tract diffusivity	Weighted-mean L3 in tract forceps minor (from dMRI data)	Tract forceps minor	33875891	31355	0	0	European
IDP_dMRI_ProbtrackX_L3_ifo_l_PMID33875891	Brain dMRI	WM tract diffusivity	Weighted-mean L3 in tract left inferior fronto-occipital fasciculus (from dMRI data)	Tract Inferior fronto-occipital fasciculus	33875891	31355	0	0	European
IDP_dMRI_ProbtrackX_L3_ifo_r_PMID33875891	Brain dMRI	WM tract diffusivity	Weighted-mean L3 in tract right inferior fronto-occipital fasciculus (from dMRI data)	Tract Inferior fronto-occipital fasciculus	33875891	31355	0	0	European
IDP_dMRI_ProbtrackX_L3_ilf_l_PMID33875891	Brain dMRI	WM tract diffusivity	Weighted-mean L3 in tract left inferior longitudinal fasciculus (from dMRI data)	Tract Inferior longitudinal fasciculus	33875891	31355	0	0	European
IDP_dMRI_ProbtrackX_L3_ilf_r_PMID33875891	Brain dMRI	WM tract diffusivity	Weighted-mean L3 in tract right inferior longitudinal fasciculus (from dMRI data)	Tract Inferior longitudinal fasciculus	33875891	31355	0	0	European
IDP_dMRI_ProbtrackX_L3_mcp_PMID33875891	Brain dMRI	WM tract diffusivity	Weighted-mean L3 in tract middle cerebellar peduncle (from dMRI data)	Tract Middle cerebellar peduncle	33875891	31355	0	0	European
IDP_dMRI_ProbtrackX_L3_ml_l_PMID33875891	Brain dMRI	WM tract diffusivity	Weighted-mean L3 in tract left medial lemniscus (from dMRI data)	Tract Medial lemniscus	33875891	31355	0	0	European
IDP_dMRI_ProbtrackX_L3_ml_r_PMID33875891	Brain dMRI	WM tract diffusivity	Weighted-mean L3 in tract right medial lemniscus (from dMRI data)	Tract Medial lemniscus	33875891	31355	0	0	European
IDP_dMRI_ProbtrackX_L3_ptr_l_PMID33875891	Brain dMRI	WM tract diffusivity	Weighted-mean L3 in tract left posterior thalamic radiation (from dMRI data)	Tract Posterior thalamic radiation	33875891	31355	0	0	European
IDP_dMRI_ProbtrackX_L3_ptr_r_PMID33875891	Brain dMRI	WM tract diffusivity	Weighted-mean L3 in tract right posterior thalamic radiation (from dMRI data)	Tract Posterior thalamic radiation	33875891	31355	0	0	European
IDP_dMRI_ProbtrackX_L3_slf_l_PMID33875891	Brain dMRI	WM tract diffusivity	Weighted-mean L3 in tract left superior longitudinal fasciculus (from dMRI data)	Tract Superior longitudinal fasciculus	33875891	31355	0	0	European
IDP_dMRI_ProbtrackX_L3_slf_r_PMID33875891	Brain dMRI	WM tract diffusivity	Weighted-mean L3 in tract right superior longitudinal fasciculus (from dMRI data)	Tract Superior longitudinal fasciculus	33875891	31355	0	0	European
IDP_dMRI_ProbtrackX_L3_str_l_PMID33875891	Brain dMRI	WM tract diffusivity	Weighted-mean L3 in tract left superior thalamic radiation (from dMRI data)	Tract Superior thalamic radiation	33875891	31355	0	0	European
IDP_dMRI_ProbtrackX_L3_str_r_PMID33875891	Brain dMRI	WM tract diffusivity	Weighted-mean L3 in tract right superior thalamic radiation (from dMRI data)	Tract Superior thalamic radiation	33875891	31355	0	0	European
IDP_dMRI_ProbtrackX_L3_unc_l_PMID33875891	Brain dMRI	WM tract diffusivity	Weighted-mean L3 in tract left uncinate fasciculus (from dMRI data)	Tract Uncinate fasciculus	33875891	31355	0	0	European
IDP_dMRI_ProbtrackX_L3_unc_r_PMID33875891	Brain dMRI	WM tract diffusivity	Weighted-mean L3 in tract right uncinate fasciculus (from dMRI data)	Tract Uncinate fasciculus	33875891	31355	0	0	European
IDP_dMRI_ProbtrackX_MD_ar_l_PMID33875891	Brain dMRI	WM tract diffusivity	Weighted-mean MD (mean diffusivity) in tract left acoustic radiation (from dMRI data)	Tract acoustic radiation	33875891	31355	0	0	European
IDP_dMRI_ProbtrackX_MD_ar_r_PMID33875891	Brain dMRI	WM tract diffusivity	Weighted-mean MD (mean diffusivity) in tract right acoustic radiation (from dMRI data)	Tract acoustic radiation	33875891	31355	0	0	European
IDP_dMRI_ProbtrackX_MD_atr_l_PMID33875891	Brain dMRI	WM tract diffusivity	Weighted-mean MD (mean diffusivity) in tract left anterior thalamic radiation (from dMRI data)	Tract Anterior thalamic radiation	33875891	31355	0	0	European
IDP_dMRI_ProbtrackX_MD_atr_r_PMID33875891	Brain dMRI	WM tract diffusivity	Weighted-mean MD (mean diffusivity) in tract right anterior thalamic radiation (from dMRI data)	Tract Anterior thalamic radiation	33875891	31355	0	0	European
IDP_dMRI_ProbtrackX_MD_cgc_l_PMID33875891	Brain dMRI	WM tract diffusivity	Weighted-mean MD (mean diffusivity) in tract left cingulate gyrus part of cingulum (from dMRI data)	Tract Cingulate gyrus part of Cingulum	33875891	31355	0	0	European
IDP_dMRI_ProbtrackX_MD_cgc_r_PMID33875891	Brain dMRI	WM tract diffusivity	Weighted-mean MD (mean diffusivity) in tract right cingulate gyrus part of cingulum (from dMRI data)	Tract Cingulate gyrus part of Cingulum	33875891	31355	0	0	European
IDP_dMRI_ProbtrackX_MD_cgh_l_PMID33875891	Brain dMRI	WM tract diffusivity	Weighted-mean MD (mean diffusivity) in tract left parahippocampal part of cingulum (from dMRI data)	Tract ParaHippocampal part of Cingulum	33875891	31355	0	0	European
IDP_dMRI_ProbtrackX_MD_cgh_r_PMID33875891	Brain dMRI	WM tract diffusivity	Weighted-mean MD (mean diffusivity) in tract right parahippocampal part of cingulum (from dMRI data)	Tract ParaHippocampal part of Cingulum	33875891	31355	0	0	European
IDP_dMRI_ProbtrackX_MD_cst_l_PMID33875891	Brain dMRI	WM tract diffusivity	Weighted-mean MD (mean diffusivity) in tract left corticospinal tract (from dMRI data)	Tract Corticospinal tract	33875891	31355	0	0	European
IDP_dMRI_ProbtrackX_MD_cst_r_PMID33875891	Brain dMRI	WM tract diffusivity	Weighted-mean MD (mean diffusivity) in tract right corticospinal tract (from dMRI data)	Tract Corticospinal tract	33875891	31355	0	0	European
IDP_dMRI_ProbtrackX_MD_fma_PMID33875891	Brain dMRI	WM tract diffusivity	Weighted-mean MD (mean diffusivity) in tract forceps major (from dMRI data)	Tract forceps major	33875891	31355	0	0	European
IDP_dMRI_ProbtrackX_MD_fmi_PMID33875891	Brain dMRI	WM tract diffusivity	Weighted-mean MD (mean diffusivity) in tract forceps minor (from dMRI data)	Tract forceps minor	33875891	31355	0	0	European
IDP_dMRI_ProbtrackX_MD_ifo_l_PMID33875891	Brain dMRI	WM tract diffusivity	Weighted-mean MD (mean diffusivity) in tract left inferior fronto-occipital fasciculus (from dMRI data)	Tract Inferior fronto-occipital fasciculus	33875891	31355	0	0	European
IDP_dMRI_ProbtrackX_MD_ifo_r_PMID33875891	Brain dMRI	WM tract diffusivity	Weighted-mean MD (mean diffusivity) in tract right inferior fronto-occipital fasciculus (from dMRI data)	Tract Inferior fronto-occipital fasciculus	33875891	31355	0	0	European
IDP_dMRI_ProbtrackX_MD_ilf_l_PMID33875891	Brain dMRI	WM tract diffusivity	Weighted-mean MD (mean diffusivity) in tract left inferior longitudinal fasciculus (from dMRI data)	Tract Inferior longitudinal fasciculus	33875891	31355	0	0	European
IDP_dMRI_ProbtrackX_MD_ilf_r_PMID33875891	Brain dMRI	WM tract diffusivity	Weighted-mean MD (mean diffusivity) in tract right inferior longitudinal fasciculus (from dMRI data)	Tract Inferior longitudinal fasciculus	33875891	31355	0	0	European
IDP_dMRI_ProbtrackX_MD_mcp_PMID33875891	Brain dMRI	WM tract diffusivity	Weighted-mean MD (mean diffusivity) in tract middle cerebellar peduncle (from dMRI data)	Tract Middle cerebellar peduncle	33875891	31355	0	0	European
IDP_dMRI_ProbtrackX_MD_ml_l_PMID33875891	Brain dMRI	WM tract diffusivity	Weighted-mean MD (mean diffusivity) in tract left medial lemniscus (from dMRI data)	Tract Medial lemniscus	33875891	31355	0	0	European
IDP_dMRI_ProbtrackX_MD_ml_r_PMID33875891	Brain dMRI	WM tract diffusivity	Weighted-mean MD (mean diffusivity) in tract right medial lemniscus (from dMRI data)	Tract Medial lemniscus	33875891	31355	0	0	European
IDP_dMRI_ProbtrackX_MD_ptr_l_PMID33875891	Brain dMRI	WM tract diffusivity	Weighted-mean MD (mean diffusivity) in tract left posterior thalamic radiation (from dMRI data)	Tract Posterior thalamic radiation	33875891	31355	0	0	European
IDP_dMRI_ProbtrackX_MD_ptr_r_PMID33875891	Brain dMRI	WM tract diffusivity	Weighted-mean MD (mean diffusivity) in tract right posterior thalamic radiation (from dMRI data)	Tract Posterior thalamic radiation	33875891	31355	0	0	European
IDP_dMRI_ProbtrackX_MD_slf_l_PMID33875891	Brain dMRI	WM tract diffusivity	Weighted-mean MD (mean diffusivity) in tract left superior longitudinal fasciculus (from dMRI data)	Tract Superior longitudinal fasciculus	33875891	31355	0	0	European
IDP_dMRI_ProbtrackX_MD_slf_r_PMID33875891	Brain dMRI	WM tract diffusivity	Weighted-mean MD (mean diffusivity) in tract right superior longitudinal fasciculus (from dMRI data)	Tract Superior longitudinal fasciculus	33875891	31355	0	0	European
IDP_dMRI_ProbtrackX_MD_str_l_PMID33875891	Brain dMRI	WM tract diffusivity	Weighted-mean MD (mean diffusivity) in tract left superior thalamic radiation (from dMRI data)	Tract Superior thalamic radiation	33875891	31355	0	0	European
IDP_dMRI_ProbtrackX_MD_str_r_PMID33875891	Brain dMRI	WM tract diffusivity	Weighted-mean MD (mean diffusivity) in tract right superior thalamic radiation (from dMRI data)	Tract Superior thalamic radiation	33875891	31355	0	0	European
IDP_dMRI_ProbtrackX_MD_unc_l_PMID33875891	Brain dMRI	WM tract diffusivity	Weighted-mean MD (mean diffusivity) in tract left uncinate fasciculus (from dMRI data)	Tract Uncinate fasciculus	33875891	31355	0	0	European
IDP_dMRI_ProbtrackX_MD_unc_r_PMID33875891	Brain dMRI	WM tract diffusivity	Weighted-mean MD (mean diffusivity) in tract right uncinate fasciculus (from dMRI data)	Tract Uncinate fasciculus	33875891	31355	0	0	European
IDP_dMRI_ProbtrackX_MO_ar_l_PMID33875891	Brain dMRI	WM tract MO	Weighted-mean MO (diffusion tensor mode) in tract left acoustic radiation (from dMRI data)	Tract acoustic radiation	33875891	31355	0	0	European
IDP_dMRI_ProbtrackX_MO_ar_r_PMID33875891	Brain dMRI	WM tract MO	Weighted-mean MO (diffusion tensor mode) in tract right acoustic radiation (from dMRI data)	Tract acoustic radiation	33875891	31355	0	0	European
IDP_dMRI_ProbtrackX_MO_atr_l_PMID33875891	Brain dMRI	WM tract MO	Weighted-mean MO (diffusion tensor mode) in tract left anterior thalamic radiation (from dMRI data)	Tract Anterior thalamic radiation	33875891	31355	0	0	European
IDP_dMRI_ProbtrackX_MO_atr_r_PMID33875891	Brain dMRI	WM tract MO	Weighted-mean MO (diffusion tensor mode) in tract right anterior thalamic radiation (from dMRI data)	Tract Anterior thalamic radiation	33875891	31355	0	0	European
IDP_dMRI_ProbtrackX_MO_cgc_l_PMID33875891	Brain dMRI	WM tract MO	Weighted-mean MO (diffusion tensor mode) in tract left cingulate gyrus part of cingulum (from dMRI data)	Tract Cingulate gyrus part of Cingulum	33875891	31355	0	0	European
IDP_dMRI_ProbtrackX_MO_cgc_r_PMID33875891	Brain dMRI	WM tract MO	Weighted-mean MO (diffusion tensor mode) in tract right cingulate gyrus part of cingulum (from dMRI data)	Tract Cingulate gyrus part of Cingulum	33875891	31355	0	0	European
IDP_dMRI_ProbtrackX_MO_cgh_l_PMID33875891	Brain dMRI	WM tract MO	Weighted-mean MO (diffusion tensor mode) in tract left parahippocampal part of cingulum (from dMRI data)	Tract ParaHippocampal part of Cingulum	33875891	31355	0	0	European
IDP_dMRI_ProbtrackX_MO_cgh_r_PMID33875891	Brain dMRI	WM tract MO	Weighted-mean MO (diffusion tensor mode) in tract right parahippocampal part of cingulum (from dMRI data)	Tract ParaHippocampal part of Cingulum	33875891	31355	0	0	European
IDP_dMRI_ProbtrackX_MO_cst_l_PMID33875891	Brain dMRI	WM tract MO	Weighted-mean MO (diffusion tensor mode) in tract left corticospinal tract (from dMRI data)	Tract Corticospinal tract	33875891	31355	0	0	European
IDP_dMRI_ProbtrackX_MO_cst_r_PMID33875891	Brain dMRI	WM tract MO	Weighted-mean MO (diffusion tensor mode) in tract right corticospinal tract (from dMRI data)	Tract Corticospinal tract	33875891	31355	0	0	European
IDP_dMRI_ProbtrackX_MO_fma_PMID33875891	Brain dMRI	WM tract MO	Weighted-mean MO (diffusion tensor mode) in tract forceps major (from dMRI data)	Tract forceps major	33875891	31355	0	0	European
IDP_dMRI_ProbtrackX_MO_fmi_PMID33875891	Brain dMRI	WM tract MO	Weighted-mean MO (diffusion tensor mode) in tract forceps minor (from dMRI data)	Tract forceps minor	33875891	31355	0	0	European
IDP_dMRI_ProbtrackX_MO_ifo_l_PMID33875891	Brain dMRI	WM tract MO	Weighted-mean MO (diffusion tensor mode) in tract left inferior fronto-occipital fasciculus (from dMRI data)	Tract Inferior fronto-occipital fasciculus	33875891	31355	0	0	European
IDP_dMRI_ProbtrackX_MO_ifo_r_PMID33875891	Brain dMRI	WM tract MO	Weighted-mean MO (diffusion tensor mode) in tract right inferior fronto-occipital fasciculus (from dMRI data)	Tract Inferior fronto-occipital fasciculus	33875891	31355	0	0	European
IDP_dMRI_ProbtrackX_MO_ilf_l_PMID33875891	Brain dMRI	WM tract MO	Weighted-mean MO (diffusion tensor mode) in tract left inferior longitudinal fasciculus (from dMRI data)	Tract Inferior longitudinal fasciculus	33875891	31355	0	0	European
IDP_dMRI_ProbtrackX_MO_ilf_r_PMID33875891	Brain dMRI	WM tract MO	Weighted-mean MO (diffusion tensor mode) in tract right inferior longitudinal fasciculus (from dMRI data)	Tract Inferior longitudinal fasciculus	33875891	31355	0	0	European
IDP_dMRI_ProbtrackX_MO_mcp_PMID33875891	Brain dMRI	WM tract MO	Weighted-mean MO (diffusion tensor mode) in tract middle cerebellar peduncle (from dMRI data)	Tract Middle cerebellar peduncle	33875891	31355	0	0	European
IDP_dMRI_ProbtrackX_MO_ml_l_PMID33875891	Brain dMRI	WM tract MO	Weighted-mean MO (diffusion tensor mode) in tract left medial lemniscus (from dMRI data)	Tract Medial lemniscus	33875891	31355	0	0	European
IDP_dMRI_ProbtrackX_MO_ml_r_PMID33875891	Brain dMRI	WM tract MO	Weighted-mean MO (diffusion tensor mode) in tract right medial lemniscus (from dMRI data)	Tract Medial lemniscus	33875891	31355	0	0	European
IDP_dMRI_ProbtrackX_MO_ptr_l_PMID33875891	Brain dMRI	WM tract MO	Weighted-mean MO (diffusion tensor mode) in tract left posterior thalamic radiation (from dMRI data)	Tract Posterior thalamic radiation	33875891	31355	0	0	European
IDP_dMRI_ProbtrackX_MO_ptr_r_PMID33875891	Brain dMRI	WM tract MO	Weighted-mean MO (diffusion tensor mode) in tract right posterior thalamic radiation (from dMRI data)	Tract Posterior thalamic radiation	33875891	31355	0	0	European
IDP_dMRI_ProbtrackX_MO_slf_l_PMID33875891	Brain dMRI	WM tract MO	Weighted-mean MO (diffusion tensor mode) in tract left superior longitudinal fasciculus (from dMRI data)	Tract Superior longitudinal fasciculus	33875891	31355	0	0	European
IDP_dMRI_ProbtrackX_MO_slf_r_PMID33875891	Brain dMRI	WM tract MO	Weighted-mean MO (diffusion tensor mode) in tract right superior longitudinal fasciculus (from dMRI data)	Tract Superior longitudinal fasciculus	33875891	31355	0	0	European
IDP_dMRI_ProbtrackX_MO_str_l_PMID33875891	Brain dMRI	WM tract MO	Weighted-mean MO (diffusion tensor mode) in tract left superior thalamic radiation (from dMRI data)	Tract Superior thalamic radiation	33875891	31355	0	0	European
IDP_dMRI_ProbtrackX_MO_str_r_PMID33875891	Brain dMRI	WM tract MO	Weighted-mean MO (diffusion tensor mode) in tract right superior thalamic radiation (from dMRI data)	Tract Superior thalamic radiation	33875891	31355	0	0	European
IDP_dMRI_ProbtrackX_MO_unc_l_PMID33875891	Brain dMRI	WM tract MO	Weighted-mean MO (diffusion tensor mode) in tract left uncinate fasciculus (from dMRI data)	Tract Uncinate fasciculus	33875891	31355	0	0	European
IDP_dMRI_ProbtrackX_MO_unc_r_PMID33875891	Brain dMRI	WM tract MO	Weighted-mean MO (diffusion tensor mode) in tract right uncinate fasciculus (from dMRI data)	Tract Uncinate fasciculus	33875891	31355	0	0	European
IDP_dMRI_ProbtrackX_OD_ar_l_PMID33875891	Brain dMRI	WM tract OD	Weighted-mean OD (orientation dispersion index) in tract left acoustic radiation (from dMRI data)	Tract acoustic radiation	33875891	31354	0	0	European
IDP_dMRI_ProbtrackX_OD_ar_r_PMID33875891	Brain dMRI	WM tract OD	Weighted-mean OD (orientation dispersion index) in tract right acoustic radiation (from dMRI data)	Tract acoustic radiation	33875891	31354	0	0	European
IDP_dMRI_ProbtrackX_OD_atr_l_PMID33875891	Brain dMRI	WM tract OD	Weighted-mean OD (orientation dispersion index) in tract left anterior thalamic radiation (from dMRI data)	Tract Anterior thalamic radiation	33875891	31354	0	0	European
IDP_dMRI_ProbtrackX_OD_atr_r_PMID33875891	Brain dMRI	WM tract OD	Weighted-mean OD (orientation dispersion index) in tract right anterior thalamic radiation (from dMRI data)	Tract Anterior thalamic radiation	33875891	31354	0	0	European
IDP_dMRI_ProbtrackX_OD_cgc_l_PMID33875891	Brain dMRI	WM tract OD	Weighted-mean OD (orientation dispersion index) in tract left cingulate gyrus part of cingulum (from dMRI data)	Tract Cingulate gyrus part of Cingulum	33875891	31354	0	0	European
IDP_dMRI_ProbtrackX_OD_cgc_r_PMID33875891	Brain dMRI	WM tract OD	Weighted-mean OD (orientation dispersion index) in tract right cingulate gyrus part of cingulum (from dMRI data)	Tract Cingulate gyrus part of Cingulum	33875891	31354	0	0	European
IDP_dMRI_ProbtrackX_OD_cgh_l_PMID33875891	Brain dMRI	WM tract OD	Weighted-mean OD (orientation dispersion index) in tract left parahippocampal part of cingulum (from dMRI data)	Tract ParaHippocampal part of Cingulum	33875891	31354	0	0	European
IDP_dMRI_ProbtrackX_OD_cgh_r_PMID33875891	Brain dMRI	WM tract OD	Weighted-mean OD (orientation dispersion index) in tract right parahippocampal part of cingulum (from dMRI data)	Tract ParaHippocampal part of Cingulum	33875891	31354	0	0	European
IDP_dMRI_ProbtrackX_OD_cst_l_PMID33875891	Brain dMRI	WM tract OD	Weighted-mean OD (orientation dispersion index) in tract left corticospinal tract (from dMRI data)	Tract Corticospinal tract	33875891	31354	0	0	European
IDP_dMRI_ProbtrackX_OD_cst_r_PMID33875891	Brain dMRI	WM tract OD	Weighted-mean OD (orientation dispersion index) in tract right corticospinal tract (from dMRI data)	Tract Corticospinal tract	33875891	31354	0	0	European
IDP_dMRI_ProbtrackX_OD_fma_PMID33875891	Brain dMRI	WM tract OD	Weighted-mean OD (orientation dispersion index) in tract forceps major (from dMRI data)	Tract forceps major	33875891	31354	0	0	European
IDP_dMRI_ProbtrackX_OD_fmi_PMID33875891	Brain dMRI	WM tract OD	Weighted-mean OD (orientation dispersion index) in tract forceps minor (from dMRI data)	Tract forceps minor	33875891	31354	0	0	European
IDP_dMRI_ProbtrackX_OD_ifo_l_PMID33875891	Brain dMRI	WM tract OD	Weighted-mean OD (orientation dispersion index) in tract left inferior fronto-occipital fasciculus (from dMRI data)	Tract Inferior fronto-occipital fasciculus	33875891	31354	0	0	European
IDP_dMRI_ProbtrackX_OD_ifo_r_PMID33875891	Brain dMRI	WM tract OD	Weighted-mean OD (orientation dispersion index) in tract right inferior fronto-occipital fasciculus (from dMRI data)	Tract Inferior fronto-occipital fasciculus	33875891	31354	0	0	European
IDP_dMRI_ProbtrackX_OD_ilf_l_PMID33875891	Brain dMRI	WM tract OD	Weighted-mean OD (orientation dispersion index) in tract left inferior longitudinal fasciculus (from dMRI data)	Tract Inferior longitudinal fasciculus	33875891	31354	0	0	European
IDP_dMRI_ProbtrackX_OD_ilf_r_PMID33875891	Brain dMRI	WM tract OD	Weighted-mean OD (orientation dispersion index) in tract right inferior longitudinal fasciculus (from dMRI data)	Tract Inferior longitudinal fasciculus	33875891	31354	0	0	European
IDP_dMRI_ProbtrackX_OD_mcp_PMID33875891	Brain dMRI	WM tract OD	Weighted-mean OD (orientation dispersion index) in tract middle cerebellar peduncle (from dMRI data)	Tract Middle cerebellar peduncle	33875891	31354	0	0	European
IDP_dMRI_ProbtrackX_OD_ml_l_PMID33875891	Brain dMRI	WM tract OD	Weighted-mean OD (orientation dispersion index) in tract left medial lemniscus (from dMRI data)	Tract Medial lemniscus	33875891	31354	0	0	European
IDP_dMRI_ProbtrackX_OD_ml_r_PMID33875891	Brain dMRI	WM tract OD	Weighted-mean OD (orientation dispersion index) in tract right medial lemniscus (from dMRI data)	Tract Medial lemniscus	33875891	31354	0	0	European
IDP_dMRI_ProbtrackX_OD_ptr_l_PMID33875891	Brain dMRI	WM tract OD	Weighted-mean OD (orientation dispersion index) in tract left posterior thalamic radiation (from dMRI data)	Tract Posterior thalamic radiation	33875891	31354	0	0	European
IDP_dMRI_ProbtrackX_OD_ptr_r_PMID33875891	Brain dMRI	WM tract OD	Weighted-mean OD (orientation dispersion index) in tract right posterior thalamic radiation (from dMRI data)	Tract Posterior thalamic radiation	33875891	31354	0	0	European
IDP_dMRI_ProbtrackX_OD_slf_l_PMID33875891	Brain dMRI	WM tract OD	Weighted-mean OD (orientation dispersion index) in tract left superior longitudinal fasciculus (from dMRI data)	Tract Superior longitudinal fasciculus	33875891	31354	0	0	European
IDP_dMRI_ProbtrackX_OD_slf_r_PMID33875891	Brain dMRI	WM tract OD	Weighted-mean OD (orientation dispersion index) in tract right superior longitudinal fasciculus (from dMRI data)	Tract Superior longitudinal fasciculus	33875891	31354	0	0	European
IDP_dMRI_ProbtrackX_OD_str_l_PMID33875891	Brain dMRI	WM tract OD	Weighted-mean OD (orientation dispersion index) in tract left superior thalamic radiation (from dMRI data)	Tract Superior thalamic radiation	33875891	31354	0	0	European
IDP_dMRI_ProbtrackX_OD_str_r_PMID33875891	Brain dMRI	WM tract OD	Weighted-mean OD (orientation dispersion index) in tract right superior thalamic radiation (from dMRI data)	Tract Superior thalamic radiation	33875891	31354	0	0	European
IDP_dMRI_ProbtrackX_OD_unc_l_PMID33875891	Brain dMRI	WM tract OD	Weighted-mean OD (orientation dispersion index) in tract left uncinate fasciculus (from dMRI data)	Tract Uncinate fasciculus	33875891	31354	0	0	European
IDP_dMRI_ProbtrackX_OD_unc_r_PMID33875891	Brain dMRI	WM tract OD	Weighted-mean OD (orientation dispersion index) in tract right uncinate fasciculus (from dMRI data)	Tract Uncinate fasciculus	33875891	31354	0	0	European
IDP_dMRI_TBSS_FA_Anterior_corona_radiata_L_PMID33875891	Brain dMRI	WM tract FA	Mean FA (fractional anisotropy) in anterior corona radiata (left) on FA skeleton (from dMRI data)	Anterior corona radiata	33875891	31356	0	0	European
IDP_dMRI_TBSS_FA_Anterior_corona_radiata_R_PMID33875891	Brain dMRI	WM tract FA	Mean FA (fractional anisotropy) in anterior corona radiata (right) on FA skeleton (from dMRI data)	Anterior corona radiata	33875891	31356	0	0	European
IDP_dMRI_TBSS_FA_Anterior_limb_of_internal_capsule_L_PMID33875891	Brain dMRI	WM tract FA	Mean FA (fractional anisotropy) in anterior limb of internal capsule (left) on FA skeleton (from dMRI data)	Anterior limb of internal capsule	33875891	31356	0	0	European
IDP_dMRI_TBSS_FA_Anterior_limb_of_internal_capsule_R_PMID33875891	Brain dMRI	WM tract FA	Mean FA (fractional anisotropy) in anterior limb of internal capsule (right) on FA skeleton (from dMRI data)	Anterior limb of internal capsule	33875891	31356	0	0	European
IDP_dMRI_TBSS_FA_Body_of_corpus_callosum_PMID33875891	Brain dMRI	WM tract FA	Mean FA (fractional anisotropy) in body of corpus callosum on FA skeleton (from dMRI data)	Body of corpus callosum	33875891	31356	0	0	European
IDP_dMRI_TBSS_FA_Cerebral_peduncle_L_PMID33875891	Brain dMRI	WM tract FA	Mean FA (fractional anisotropy) in cerebral peduncle (left) on FA skeleton (from dMRI data)	Cerebral peduncle	33875891	31356	0	0	European
IDP_dMRI_TBSS_FA_Cerebral_peduncle_R_PMID33875891	Brain dMRI	WM tract FA	Mean FA (fractional anisotropy) in cerebral peduncle (right) on FA skeleton (from dMRI data)	Cerebral peduncle	33875891	31356	0	0	European
IDP_dMRI_TBSS_FA_Cingulum_cingulate_gyrus_L_PMID33875891	Brain dMRI	WM tract FA	Mean FA (fractional anisotropy) in cingulum cingulate gyrus (left) on FA skeleton (from dMRI data)	Cingulum Cingulate gyrus	33875891	31356	0	0	European
IDP_dMRI_TBSS_FA_Cingulum_cingulate_gyrus_R_PMID33875891	Brain dMRI	WM tract FA	Mean FA (fractional anisotropy) in cingulum cingulate gyrus (right) on FA skeleton (from dMRI data)	Cingulum Cingulate gyrus	33875891	31356	0	0	European
IDP_dMRI_TBSS_FA_Cingulum_hippocampus_L_PMID33875891	Brain dMRI	WM tract FA	Mean FA (fractional anisotropy) in cingulum hippocampus (left) on FA skeleton (from dMRI data)	Cingulum Hippocampus	33875891	31356	0	0	European
IDP_dMRI_TBSS_FA_Cingulum_hippocampus_R_PMID33875891	Brain dMRI	WM tract FA	Mean FA (fractional anisotropy) in cingulum hippocampus (right) on FA skeleton (from dMRI data)	Cingulum Hippocampus	33875891	31356	0	0	European
IDP_dMRI_TBSS_FA_Corticospinal_tract_L_PMID33875891	Brain dMRI	WM tract FA	Mean FA (fractional anisotropy) in corticospinal tract (left) on FA skeleton (from dMRI data)	Corticospinal tract	33875891	31356	0	0	European
IDP_dMRI_TBSS_FA_Corticospinal_tract_R_PMID33875891	Brain dMRI	WM tract FA	Mean FA (fractional anisotropy) in corticospinal tract (right) on FA skeleton (from dMRI data)	Corticospinal tract	33875891	31356	0	0	European
IDP_dMRI_TBSS_FA_External_capsule_L_PMID33875891	Brain dMRI	WM tract FA	Mean FA (fractional anisotropy) in external capsule (left) on FA skeleton (from dMRI data)	External capsule	33875891	31356	0	0	European
IDP_dMRI_TBSS_FA_External_capsule_R_PMID33875891	Brain dMRI	WM tract FA	Mean FA (fractional anisotropy) in external capsule (right) on FA skeleton (from dMRI data)	External capsule	33875891	31356	0	0	European
IDP_dMRI_TBSS_FA_Fornix_cres_Stria_terminalis_L_PMID33875891	Brain dMRI	WM tract FA	Mean FA (fractional anisotropy) in fornix cres+stria terminalis (left) on FA skeleton (from dMRI data)	Fornix cres+stria terminalis	33875891	31356	0	0	European
IDP_dMRI_TBSS_FA_Fornix_cres_Stria_terminalis_R_PMID33875891	Brain dMRI	WM tract FA	Mean FA (fractional anisotropy) in fornix cres+stria terminalis (right) on FA skeleton (from dMRI data)	Fornix cres+stria terminalis	33875891	31356	0	0	European
IDP_dMRI_TBSS_FA_Fornix_PMID33875891	Brain dMRI	WM tract FA	Mean FA (fractional anisotropy) in fornix on FA skeleton (from dMRI data)	Fornix	33875891	31356	0	0	European
IDP_dMRI_TBSS_FA_Genu_of_corpus_callosum_PMID33875891	Brain dMRI	WM tract FA	Mean FA (fractional anisotropy) in genu of corpus callosum on FA skeleton (from dMRI data)	Genu of corpus callosum	33875891	31356	0	0	European
IDP_dMRI_TBSS_FA_Inferior_cerebellar_peduncle_L_PMID33875891	Brain dMRI	WM tract FA	Mean FA (fractional anisotropy) in inferior cerebellar peduncle (left) on FA skeleton (from dMRI data)	Inferior cerebellar peduncle	33875891	31356	0	0	European
IDP_dMRI_TBSS_FA_Inferior_cerebellar_peduncle_R_PMID33875891	Brain dMRI	WM tract FA	Mean FA (fractional anisotropy) in inferior cerebellar peduncle (right) on FA skeleton (from dMRI data)	Inferior cerebellar peduncle	33875891	31356	0	0	European
IDP_dMRI_TBSS_FA_Medial_lemniscus_L_PMID33875891	Brain dMRI	WM tract FA	Mean FA (fractional anisotropy) in medial lemniscus (left) on FA skeleton (from dMRI data)	Medial lemniscus	33875891	31356	0	0	European
IDP_dMRI_TBSS_FA_Medial_lemniscus_R_PMID33875891	Brain dMRI	WM tract FA	Mean FA (fractional anisotropy) in medial lemniscus (right) on FA skeleton (from dMRI data)	Medial lemniscus	33875891	31356	0	0	European
IDP_dMRI_TBSS_FA_Middle_cerebellar_peduncle_PMID33875891	Brain dMRI	WM tract FA	Mean FA (fractional anisotropy) in middle cerebellar peduncle on FA skeleton (from dMRI data)	Middle cerebellar peduncle	33875891	31356	0	0	European
IDP_dMRI_TBSS_FA_Pontine_crossing_tract_PMID33875891	Brain dMRI	WM tract FA	Mean FA (fractional anisotropy) in pontine crossing tract on FA skeleton (from dMRI data)	Pontine crossing tract	33875891	31356	0	0	European
IDP_dMRI_TBSS_FA_Posterior_corona_radiata_L_PMID33875891	Brain dMRI	WM tract FA	Mean FA (fractional anisotropy) in posterior corona radiata (left) on FA skeleton (from dMRI data)	Posterior corona radiata	33875891	31356	0	0	European
IDP_dMRI_TBSS_FA_Posterior_corona_radiata_R_PMID33875891	Brain dMRI	WM tract FA	Mean FA (fractional anisotropy) in posterior corona radiata (right) on FA skeleton (from dMRI data)	Posterior corona radiata	33875891	31356	0	0	European
IDP_dMRI_TBSS_FA_Posterior_limb_of_internal_capsule_L_PMID33875891	Brain dMRI	WM tract FA	Mean FA (fractional anisotropy) in posterior limb of internal capsule (left) on FA skeleton (from dMRI data)	Posterior limb of internal capsule	33875891	31356	0	0	European
IDP_dMRI_TBSS_FA_Posterior_limb_of_internal_capsule_R_PMID33875891	Brain dMRI	WM tract FA	Mean FA (fractional anisotropy) in posterior limb of internal capsule (right) on FA skeleton (from dMRI data)	Posterior limb of internal capsule	33875891	31356	0	0	European
IDP_dMRI_TBSS_FA_Posterior_thalamic_radiation_L_PMID33875891	Brain dMRI	WM tract FA	Mean FA (fractional anisotropy) in posterior thalamic radiation (left) on FA skeleton (from dMRI data)	Posterior thalamic radiation	33875891	31356	0	0	European
IDP_dMRI_TBSS_FA_Posterior_thalamic_radiation_R_PMID33875891	Brain dMRI	WM tract FA	Mean FA (fractional anisotropy) in posterior thalamic radiation (right) on FA skeleton (from dMRI data)	Posterior thalamic radiation	33875891	31356	0	0	European
IDP_dMRI_TBSS_FA_Retrolenticular_part_of_internal_capsule_L_PMID33875891	Brain dMRI	WM tract FA	Mean FA (fractional anisotropy) in retrolenticular part of internal capsule (left) on FA skeleton (from dMRI data)	Retrolenticular part of internal capsule	33875891	31356	0	0	European
IDP_dMRI_TBSS_FA_Retrolenticular_part_of_internal_capsule_R_PMID33875891	Brain dMRI	WM tract FA	Mean FA (fractional anisotropy) in retrolenticular part of internal capsule (right) on FA skeleton (from dMRI data)	Retrolenticular part of internal capsule	33875891	31356	0	0	European
IDP_dMRI_TBSS_FA_Sagittal_stratum_L_PMID33875891	Brain dMRI	WM tract FA	Mean FA (fractional anisotropy) in sagittal stratum (left) on FA skeleton (from dMRI data)	Sagittal stratum	33875891	31356	0	0	European
IDP_dMRI_TBSS_FA_Sagittal_stratum_R_PMID33875891	Brain dMRI	WM tract FA	Mean FA (fractional anisotropy) in sagittal stratum (right) on FA skeleton (from dMRI data)	Sagittal stratum	33875891	31356	0	0	European
IDP_dMRI_TBSS_FA_Splenium_of_corpus_callosum_PMID33875891	Brain dMRI	WM tract FA	Mean FA (fractional anisotropy) in splenium of corpus callosum on FA skeleton (from dMRI data)	Splenium of corpus callosum	33875891	31356	0	0	European
IDP_dMRI_TBSS_FA_Superior_cerebellar_peduncle_L_PMID33875891	Brain dMRI	WM tract FA	Mean FA (fractional anisotropy) in superior cerebellar peduncle (left) on FA skeleton (from dMRI data)	Superior cerebellar peduncle	33875891	31356	0	0	European
IDP_dMRI_TBSS_FA_Superior_cerebellar_peduncle_R_PMID33875891	Brain dMRI	WM tract FA	Mean FA (fractional anisotropy) in superior cerebellar peduncle (right) on FA skeleton (from dMRI data)	Superior cerebellar peduncle	33875891	31356	0	0	European
IDP_dMRI_TBSS_FA_Superior_corona_radiata_L_PMID33875891	Brain dMRI	WM tract FA	Mean FA (fractional anisotropy) in superior corona radiata (left) on FA skeleton (from dMRI data)	Superior corona radiata	33875891	31356	0	0	European
IDP_dMRI_TBSS_FA_Superior_corona_radiata_R_PMID33875891	Brain dMRI	WM tract FA	Mean FA (fractional anisotropy) in superior corona radiata (right) on FA skeleton (from dMRI data)	Superior corona radiata	33875891	31356	0	0	European
IDP_dMRI_TBSS_FA_Superior_fronto_occipital_fasciculus_L_PMID33875891	Brain dMRI	WM tract FA	Mean FA (fractional anisotropy) in superior fronto-occipital fasciculus (left) on FA skeleton (from dMRI data)	Superior fronto-occipital fasciculus	33875891	31356	0	0	European
IDP_dMRI_TBSS_FA_Superior_fronto_occipital_fasciculus_R_PMID33875891	Brain dMRI	WM tract FA	Mean FA (fractional anisotropy) in superior fronto-occipital fasciculus (right) on FA skeleton (from dMRI data)	Superior fronto-occipital fasciculus	33875891	31356	0	0	European
IDP_dMRI_TBSS_FA_Superior_longitudinal_fasciculus_L_PMID33875891	Brain dMRI	WM tract FA	Mean FA (fractional anisotropy) in superior longitudinal fasciculus (left) on FA skeleton (from dMRI data)	Superior longitudinal fasciculus	33875891	31356	0	0	European
IDP_dMRI_TBSS_FA_Superior_longitudinal_fasciculus_R_PMID33875891	Brain dMRI	WM tract FA	Mean FA (fractional anisotropy) in superior longitudinal fasciculus (right) on FA skeleton (from dMRI data)	Superior longitudinal fasciculus	33875891	31356	0	0	European
IDP_dMRI_TBSS_FA_Tapetum_L_PMID33875891	Brain dMRI	WM tract FA	Mean FA (fractional anisotropy) in tapetum (left) on FA skeleton (from dMRI data)	Tapetum	33875891	31356	0	0	European
IDP_dMRI_TBSS_FA_Tapetum_R_PMID33875891	Brain dMRI	WM tract FA	Mean FA (fractional anisotropy) in tapetum (right) on FA skeleton (from dMRI data)	Tapetum	33875891	31356	0	0	European
IDP_dMRI_TBSS_FA_Uncinate_fasciculus_L_PMID33875891	Brain dMRI	WM tract FA	Mean FA (fractional anisotropy) in uncinate fasciculus (left) on FA skeleton (from dMRI data)	Uncinate fasciculus	33875891	31356	0	0	European
IDP_dMRI_TBSS_FA_Uncinate_fasciculus_R_PMID33875891	Brain dMRI	WM tract FA	Mean FA (fractional anisotropy) in uncinate fasciculus (right) on FA skeleton (from dMRI data)	Uncinate fasciculus	33875891	31356	0	0	European
IDP_dMRI_TBSS_ICVF_Anterior_corona_radiata_L_PMID33875891	Brain dMRI	WM tract ICVF	Mean ICVF (intra-cellular volume fraction) in anterior corona radiata (left) on FA (fractional anisotropy) skeleton (from dMRI data)	Anterior corona radiata	33875891	31355	0	0	European
IDP_dMRI_TBSS_ICVF_Anterior_corona_radiata_R_PMID33875891	Brain dMRI	WM tract ICVF	Mean ICVF (intra-cellular volume fraction) in anterior corona radiata (right) on FA (fractional anisotropy) skeleton (from dMRI data)	Anterior corona radiata	33875891	31355	0	0	European
IDP_dMRI_TBSS_ICVF_Anterior_limb_of_internal_capsule_L_PMID33875891	Brain dMRI	WM tract ICVF	Mean ICVF (intra-cellular volume fraction) in anterior limb of internal capsule (left) on FA (fractional anisotropy) skeleton (from dMRI data)	Anterior limb of internal capsule	33875891	31355	0	0	European
IDP_dMRI_TBSS_ICVF_Anterior_limb_of_internal_capsule_R_PMID33875891	Brain dMRI	WM tract ICVF	Mean ICVF (intra-cellular volume fraction) in anterior limb of internal capsule (right) on FA (fractional anisotropy) skeleton (from dMRI data)	Anterior limb of internal capsule	33875891	31355	0	0	European
IDP_dMRI_TBSS_ICVF_Body_of_corpus_callosum_PMID33875891	Brain dMRI	WM tract ICVF	Mean ICVF (intra-cellular volume fraction) in body of corpus callosum on FA (fractional anisotropy) skeleton (from dMRI data)	Body of corpus callosum	33875891	31355	0	0	European
IDP_dMRI_TBSS_ICVF_Cerebral_peduncle_L_PMID33875891	Brain dMRI	WM tract ICVF	Mean ICVF (intra-cellular volume fraction) in cerebral peduncle (left) on FA (fractional anisotropy) skeleton (from dMRI data)	Cerebral peduncle	33875891	31355	0	0	European
IDP_dMRI_TBSS_ICVF_Cerebral_peduncle_R_PMID33875891	Brain dMRI	WM tract ICVF	Mean ICVF (intra-cellular volume fraction) in cerebral peduncle (right) on FA (fractional anisotropy) skeleton (from dMRI data)	Cerebral peduncle	33875891	31355	0	0	European
IDP_dMRI_TBSS_ICVF_Cingulum_cingulate_gyrus_L_PMID33875891	Brain dMRI	WM tract ICVF	Mean ICVF (intra-cellular volume fraction) in cingulum cingulate gyrus (left) on FA (fractional anisotropy) skeleton (from dMRI data)	Cingulum Cingulate gyrus	33875891	31355	0	0	European
IDP_dMRI_TBSS_ICVF_Cingulum_cingulate_gyrus_R_PMID33875891	Brain dMRI	WM tract ICVF	Mean ICVF (intra-cellular volume fraction) in cingulum cingulate gyrus (right) on FA (fractional anisotropy) skeleton (from dMRI data)	Cingulum Cingulate gyrus	33875891	31355	0	0	European
IDP_dMRI_TBSS_ICVF_Cingulum_hippocampus_L_PMID33875891	Brain dMRI	WM tract ICVF	Mean ICVF (intra-cellular volume fraction) in cingulum hippocampus (left) on FA (fractional anisotropy) skeleton (from dMRI data)	Cingulum Hippocampus	33875891	31355	0	0	European
IDP_dMRI_TBSS_ICVF_Cingulum_hippocampus_R_PMID33875891	Brain dMRI	WM tract ICVF	Mean ICVF (intra-cellular volume fraction) in cingulum hippocampus (right) on FA (fractional anisotropy) skeleton (from dMRI data)	Cingulum Hippocampus	33875891	31355	0	0	European
IDP_dMRI_TBSS_ICVF_Corticospinal_tract_L_PMID33875891	Brain dMRI	WM tract ICVF	Mean ICVF (intra-cellular volume fraction) in corticospinal tract (left) on FA (fractional anisotropy) skeleton (from dMRI data)	Corticospinal tract	33875891	31355	0	0	European
IDP_dMRI_TBSS_ICVF_Corticospinal_tract_R_PMID33875891	Brain dMRI	WM tract ICVF	Mean ICVF (intra-cellular volume fraction) in corticospinal tract (right) on FA (fractional anisotropy) skeleton (from dMRI data)	Corticospinal tract	33875891	31355	0	0	European
IDP_dMRI_TBSS_ICVF_External_capsule_L_PMID33875891	Brain dMRI	WM tract ICVF	Mean ICVF (intra-cellular volume fraction) in external capsule (left) on FA (fractional anisotropy) skeleton (from dMRI data)	External capsule	33875891	31355	0	0	European
IDP_dMRI_TBSS_ICVF_External_capsule_R_PMID33875891	Brain dMRI	WM tract ICVF	Mean ICVF (intra-cellular volume fraction) in external capsule (right) on FA (fractional anisotropy) skeleton (from dMRI data)	External capsule	33875891	31355	0	0	European
IDP_dMRI_TBSS_ICVF_Fornix_cres_Stria_terminalis_L_PMID33875891	Brain dMRI	WM tract ICVF	Mean ICVF (intra-cellular volume fraction) in fornix cres+stria terminalis (left) on FA (fractional anisotropy) skeleton (from dMRI data)	Fornix cres+stria terminalis	33875891	31355	0	0	European
IDP_dMRI_TBSS_ICVF_Fornix_cres_Stria_terminalis_R_PMID33875891	Brain dMRI	WM tract ICVF	Mean ICVF (intra-cellular volume fraction) in fornix cres+stria terminalis (right) on FA (fractional anisotropy) skeleton (from dMRI data)	Fornix cres+stria terminalis	33875891	31355	0	0	European
IDP_dMRI_TBSS_ICVF_Fornix_PMID33875891	Brain dMRI	WM tract ICVF	Mean ICVF (intra-cellular volume fraction) in fornix on FA (fractional anisotropy) skeleton (from dMRI data)	Fornix	33875891	31355	0	0	European
IDP_dMRI_TBSS_ICVF_Genu_of_corpus_callosum_PMID33875891	Brain dMRI	WM tract ICVF	Mean ICVF (intra-cellular volume fraction) in genu of corpus callosum on FA (fractional anisotropy) skeleton (from dMRI data)	Genu of corpus callosum	33875891	31355	0	0	European
IDP_dMRI_TBSS_ICVF_Inferior_cerebellar_peduncle_L_PMID33875891	Brain dMRI	WM tract ICVF	Mean ICVF (intra-cellular volume fraction) in inferior cerebellar peduncle (left) on FA (fractional anisotropy) skeleton (from dMRI data)	Inferior cerebellar peduncle	33875891	31355	0	0	European
IDP_dMRI_TBSS_ICVF_Inferior_cerebellar_peduncle_R_PMID33875891	Brain dMRI	WM tract ICVF	Mean ICVF (intra-cellular volume fraction) in inferior cerebellar peduncle (right) on FA (fractional anisotropy) skeleton (from dMRI data)	Inferior cerebellar peduncle	33875891	31355	0	0	European
IDP_dMRI_TBSS_ICVF_Medial_lemniscus_L_PMID33875891	Brain dMRI	WM tract ICVF	Mean ICVF (intra-cellular volume fraction) in medial lemniscus (left) on FA (fractional anisotropy) skeleton (from dMRI data)	Medial lemniscus	33875891	31355	0	0	European
IDP_dMRI_TBSS_ICVF_Medial_lemniscus_R_PMID33875891	Brain dMRI	WM tract ICVF	Mean ICVF (intra-cellular volume fraction) in medial lemniscus (right) on FA (fractional anisotropy) skeleton (from dMRI data)	Medial lemniscus	33875891	31355	0	0	European
IDP_dMRI_TBSS_ICVF_Middle_cerebellar_peduncle_PMID33875891	Brain dMRI	WM tract ICVF	Mean ICVF (intra-cellular volume fraction) in middle cerebellar peduncle on FA (fractional anisotropy) skeleton (from dMRI data)	Middle cerebellar peduncle	33875891	31355	0	0	European
IDP_dMRI_TBSS_ICVF_Pontine_crossing_tract_PMID33875891	Brain dMRI	WM tract ICVF	Mean ICVF (intra-cellular volume fraction) in pontine crossing tract on FA (fractional anisotropy) skeleton (from dMRI data)	Pontine crossing tract	33875891	31355	0	0	European
IDP_dMRI_TBSS_ICVF_Posterior_corona_radiata_L_PMID33875891	Brain dMRI	WM tract ICVF	Mean ICVF (intra-cellular volume fraction) in posterior corona radiata (left) on FA (fractional anisotropy) skeleton (from dMRI data)	Posterior corona radiata	33875891	31355	0	0	European
IDP_dMRI_TBSS_ICVF_Posterior_corona_radiata_R_PMID33875891	Brain dMRI	WM tract ICVF	Mean ICVF (intra-cellular volume fraction) in posterior corona radiata (right) on FA (fractional anisotropy) skeleton (from dMRI data)	Posterior corona radiata	33875891	31355	0	0	European
IDP_dMRI_TBSS_ICVF_Posterior_limb_of_internal_capsule_L_PMID33875891	Brain dMRI	WM tract ICVF	Mean ICVF (intra-cellular volume fraction) in posterior limb of internal capsule (left) on FA (fractional anisotropy) skeleton (from dMRI data)	Posterior limb of internal capsule	33875891	31355	0	0	European
IDP_dMRI_TBSS_ICVF_Posterior_limb_of_internal_capsule_R_PMID33875891	Brain dMRI	WM tract ICVF	Mean ICVF (intra-cellular volume fraction) in posterior limb of internal capsule (right) on FA (fractional anisotropy) skeleton (from dMRI data)	Posterior limb of internal capsule	33875891	31355	0	0	European
IDP_dMRI_TBSS_ICVF_Posterior_thalamic_radiation_L_PMID33875891	Brain dMRI	WM tract ICVF	Mean ICVF (intra-cellular volume fraction) in posterior thalamic radiation (left) on FA (fractional anisotropy) skeleton (from dMRI data)	Posterior thalamic radiation	33875891	31355	0	0	European
IDP_dMRI_TBSS_ICVF_Posterior_thalamic_radiation_R_PMID33875891	Brain dMRI	WM tract ICVF	Mean ICVF (intra-cellular volume fraction) in posterior thalamic radiation (right) on FA (fractional anisotropy) skeleton (from dMRI data)	Posterior thalamic radiation	33875891	31355	0	0	European
IDP_dMRI_TBSS_ICVF_Retrolenticular_part_of_internal_capsule_L_PMID33875891	Brain dMRI	WM tract ICVF	Mean ICVF (intra-cellular volume fraction) in retrolenticular part of internal capsule (left) on FA (fractional anisotropy) skeleton (from dMRI data)	Retrolenticular part of internal capsule	33875891	31355	0	0	European
IDP_dMRI_TBSS_ICVF_Retrolenticular_part_of_internal_capsule_R_PMID33875891	Brain dMRI	WM tract ICVF	Mean ICVF (intra-cellular volume fraction) in retrolenticular part of internal capsule (right) on FA (fractional anisotropy) skeleton (from dMRI data)	Retrolenticular part of internal capsule	33875891	31355	0	0	European
IDP_dMRI_TBSS_ICVF_Sagittal_stratum_L_PMID33875891	Brain dMRI	WM tract ICVF	Mean ICVF (intra-cellular volume fraction) in sagittal stratum (left) on FA (fractional anisotropy) skeleton (from dMRI data)	Sagittal stratum	33875891	31355	0	0	European
IDP_dMRI_TBSS_ICVF_Sagittal_stratum_R_PMID33875891	Brain dMRI	WM tract ICVF	Mean ICVF (intra-cellular volume fraction) in sagittal stratum (right) on FA (fractional anisotropy) skeleton (from dMRI data)	Sagittal stratum	33875891	31355	0	0	European
IDP_dMRI_TBSS_ICVF_Splenium_of_corpus_callosum_PMID33875891	Brain dMRI	WM tract ICVF	Mean ICVF (intra-cellular volume fraction) in splenium of corpus callosum on FA (fractional anisotropy) skeleton (from dMRI data)	Splenium of corpus callosum	33875891	31355	0	0	European
IDP_dMRI_TBSS_ICVF_Superior_cerebellar_peduncle_L_PMID33875891	Brain dMRI	WM tract ICVF	Mean ICVF (intra-cellular volume fraction) in superior cerebellar peduncle (left) on FA (fractional anisotropy) skeleton (from dMRI data)	Superior cerebellar peduncle	33875891	31355	0	0	European
IDP_dMRI_TBSS_ICVF_Superior_cerebellar_peduncle_R_PMID33875891	Brain dMRI	WM tract ICVF	Mean ICVF (intra-cellular volume fraction) in superior cerebellar peduncle (right) on FA (fractional anisotropy) skeleton (from dMRI data)	Superior cerebellar peduncle	33875891	31355	0	0	European
IDP_dMRI_TBSS_ICVF_Superior_corona_radiata_L_PMID33875891	Brain dMRI	WM tract ICVF	Mean ICVF (intra-cellular volume fraction) in superior corona radiata (left) on FA (fractional anisotropy) skeleton (from dMRI data)	Superior corona radiata	33875891	31355	0	0	European
IDP_dMRI_TBSS_ICVF_Superior_corona_radiata_R_PMID33875891	Brain dMRI	WM tract ICVF	Mean ICVF (intra-cellular volume fraction) in superior corona radiata (right) on FA (fractional anisotropy) skeleton (from dMRI data)	Superior corona radiata	33875891	31355	0	0	European
IDP_dMRI_TBSS_ICVF_Superior_fronto_occipital_fasciculus_L_PMID33875891	Brain dMRI	WM tract ICVF	Mean ICVF (intra-cellular volume fraction) in superior fronto-occipital fasciculus (left) on FA (fractional anisotropy) skeleton (from dMRI data)	Superior fronto-occipital fasciculus	33875891	31355	0	0	European
IDP_dMRI_TBSS_ICVF_Superior_fronto_occipital_fasciculus_R_PMID33875891	Brain dMRI	WM tract ICVF	Mean ICVF (intra-cellular volume fraction) in superior fronto-occipital fasciculus (right) on FA (fractional anisotropy) skeleton (from dMRI data)	Superior fronto-occipital fasciculus	33875891	31355	0	0	European
IDP_dMRI_TBSS_ICVF_Superior_longitudinal_fasciculus_L_PMID33875891	Brain dMRI	WM tract ICVF	Mean ICVF (intra-cellular volume fraction) in superior longitudinal fasciculus (left) on FA (fractional anisotropy) skeleton (from dMRI data)	Superior longitudinal fasciculus	33875891	31355	0	0	European
IDP_dMRI_TBSS_ICVF_Superior_longitudinal_fasciculus_R_PMID33875891	Brain dMRI	WM tract ICVF	Mean ICVF (intra-cellular volume fraction) in superior longitudinal fasciculus (right) on FA (fractional anisotropy) skeleton (from dMRI data)	Superior longitudinal fasciculus	33875891	31355	0	0	European
IDP_dMRI_TBSS_ICVF_Tapetum_L_PMID33875891	Brain dMRI	WM tract ICVF	Mean ICVF (intra-cellular volume fraction) in tapetum (left) on FA (fractional anisotropy) skeleton (from dMRI data)	Tapetum	33875891	31355	0	0	European
IDP_dMRI_TBSS_ICVF_Tapetum_R_PMID33875891	Brain dMRI	WM tract ICVF	Mean ICVF (intra-cellular volume fraction) in tapetum (right) on FA (fractional anisotropy) skeleton (from dMRI data)	Tapetum	33875891	31355	0	0	European
IDP_dMRI_TBSS_ICVF_Uncinate_fasciculus_L_PMID33875891	Brain dMRI	WM tract ICVF	Mean ICVF (intra-cellular volume fraction) in uncinate fasciculus (left) on FA (fractional anisotropy) skeleton (from dMRI data)	Uncinate fasciculus	33875891	31355	0	0	European
IDP_dMRI_TBSS_ICVF_Uncinate_fasciculus_R_PMID33875891	Brain dMRI	WM tract ICVF	Mean ICVF (intra-cellular volume fraction) in uncinate fasciculus (right) on FA (fractional anisotropy) skeleton (from dMRI data)	Uncinate fasciculus	33875891	31355	0	0	European
IDP_dMRI_TBSS_ISOVF_Anterior_corona_radiata_L_PMID33875891	Brain dMRI	WM tract ISOVF	Mean ISOVF (isotropic or free water volume fraction) in anterior corona radiata (left) on FA (fractional anisotropy) skeleton (from dMRI data)	Anterior corona radiata	33875891	31355	0	0	European
IDP_dMRI_TBSS_ISOVF_Anterior_corona_radiata_R_PMID33875891	Brain dMRI	WM tract ISOVF	Mean ISOVF (isotropic or free water volume fraction) in anterior corona radiata (right) on FA (fractional anisotropy) skeleton (from dMRI data)	Anterior corona radiata	33875891	31355	0	0	European
IDP_dMRI_TBSS_ISOVF_Anterior_limb_of_internal_capsule_L_PMID33875891	Brain dMRI	WM tract ISOVF	Mean ISOVF (isotropic or free water volume fraction) in anterior limb of internal capsule (left) on FA (fractional anisotropy) skeleton (from dMRI dat	Anterior limb of internal capsule	33875891	31355	0	0	European
IDP_dMRI_TBSS_ISOVF_Anterior_limb_of_internal_capsule_R_PMID33875891	Brain dMRI	WM tract ISOVF	Mean ISOVF (isotropic or free water volume fraction) in anterior limb of internal capsule (right) on FA (fractional anisotropy) skeleton (from dMRI da	Anterior limb of internal capsule	33875891	31355	0	0	European
IDP_dMRI_TBSS_ISOVF_Body_of_corpus_callosum_PMID33875891	Brain dMRI	WM tract ISOVF	Mean ISOVF (isotropic or free water volume fraction) in body of corpus callosum on FA (fractional anisotropy) skeleton (from dMRI data)	Body of corpus callosum	33875891	31355	0	0	European
IDP_dMRI_TBSS_ISOVF_Cerebral_peduncle_L_PMID33875891	Brain dMRI	WM tract ISOVF	Mean ISOVF (isotropic or free water volume fraction) in cerebral peduncle (left) on FA (fractional anisotropy) skeleton (from dMRI data)	Cerebral peduncle	33875891	31355	0	0	European
IDP_dMRI_TBSS_ISOVF_Cerebral_peduncle_R_PMID33875891	Brain dMRI	WM tract ISOVF	Mean ISOVF (isotropic or free water volume fraction) in cerebral peduncle (right) on FA (fractional anisotropy) skeleton (from dMRI data)	Cerebral peduncle	33875891	31355	0	0	European
IDP_dMRI_TBSS_ISOVF_Cingulum_cingulate_gyrus_L_PMID33875891	Brain dMRI	WM tract ISOVF	Mean ISOVF (isotropic or free water volume fraction) in cingulum cingulate gyrus (left) on FA (fractional anisotropy) skeleton (from dMRI data)	Cingulum Cingulate gyrus	33875891	31355	0	0	European
IDP_dMRI_TBSS_ISOVF_Cingulum_cingulate_gyrus_R_PMID33875891	Brain dMRI	WM tract ISOVF	Mean ISOVF (isotropic or free water volume fraction) in cingulum cingulate gyrus (right) on FA (fractional anisotropy) skeleton (from dMRI data)	Cingulum Cingulate gyrus	33875891	31355	0	0	European
IDP_dMRI_TBSS_ISOVF_Cingulum_hippocampus_L_PMID33875891	Brain dMRI	WM tract ISOVF	Mean ISOVF (isotropic or free water volume fraction) in cingulum hippocampus (left) on FA (fractional anisotropy) skeleton (from dMRI data)	Cingulum Hippocampus	33875891	31355	0	0	European
IDP_dMRI_TBSS_ISOVF_Cingulum_hippocampus_R_PMID33875891	Brain dMRI	WM tract ISOVF	Mean ISOVF (isotropic or free water volume fraction) in cingulum hippocampus (right) on FA (fractional anisotropy) skeleton (from dMRI data)	Cingulum Hippocampus	33875891	31355	0	0	European
IDP_dMRI_TBSS_ISOVF_Corticospinal_tract_L_PMID33875891	Brain dMRI	WM tract ISOVF	Mean ISOVF (isotropic or free water volume fraction) in corticospinal tract (left) on FA (fractional anisotropy) skeleton (from dMRI data)	Corticospinal tract	33875891	31355	0	0	European
IDP_dMRI_TBSS_ISOVF_Corticospinal_tract_R_PMID33875891	Brain dMRI	WM tract ISOVF	Mean ISOVF (isotropic or free water volume fraction) in corticospinal tract (right) on FA (fractional anisotropy) skeleton (from dMRI data)	Corticospinal tract	33875891	31355	0	0	European
IDP_dMRI_TBSS_ISOVF_External_capsule_L_PMID33875891	Brain dMRI	WM tract ISOVF	Mean ISOVF (isotropic or free water volume fraction) in external capsule (left) on FA (fractional anisotropy) skeleton (from dMRI data)	External capsule	33875891	31355	0	0	European
IDP_dMRI_TBSS_ISOVF_External_capsule_R_PMID33875891	Brain dMRI	WM tract ISOVF	Mean ISOVF (isotropic or free water volume fraction) in external capsule (right) on FA (fractional anisotropy) skeleton (from dMRI data)	External capsule	33875891	31355	0	0	European
IDP_dMRI_TBSS_ISOVF_Fornix_cres_Stria_terminalis_L_PMID33875891	Brain dMRI	WM tract ISOVF	Mean ISOVF (isotropic or free water volume fraction) in fornix cres+stria terminalis (left) on FA (fractional anisotropy) skeleton (from dMRI data)	Fornix cres+stria terminalis	33875891	31355	0	0	European
IDP_dMRI_TBSS_ISOVF_Fornix_cres_Stria_terminalis_R_PMID33875891	Brain dMRI	WM tract ISOVF	Mean ISOVF (isotropic or free water volume fraction) in fornix cres+stria terminalis (right) on FA (fractional anisotropy) skeleton (from dMRI data)	Fornix cres+stria terminalis	33875891	31355	0	0	European
IDP_dMRI_TBSS_ISOVF_Fornix_PMID33875891	Brain dMRI	WM tract ISOVF	Mean ISOVF (isotropic or free water volume fraction) in fornix on FA (fractional anisotropy) skeleton (from dMRI data)	Fornix	33875891	31355	0	0	European
IDP_dMRI_TBSS_ISOVF_Genu_of_corpus_callosum_PMID33875891	Brain dMRI	WM tract ISOVF	Mean ISOVF (isotropic or free water volume fraction) in genu of corpus callosum on FA (fractional anisotropy) skeleton (from dMRI data)	Genu of corpus callosum	33875891	31355	0	0	European
IDP_dMRI_TBSS_ISOVF_Inferior_cerebellar_peduncle_L_PMID33875891	Brain dMRI	WM tract ISOVF	Mean ISOVF (isotropic or free water volume fraction) in inferior cerebellar peduncle (left) on FA (fractional anisotropy) skeleton (from dMRI data)	Inferior cerebellar peduncle	33875891	31355	0	0	European
IDP_dMRI_TBSS_ISOVF_Inferior_cerebellar_peduncle_R_PMID33875891	Brain dMRI	WM tract ISOVF	Mean ISOVF (isotropic or free water volume fraction) in inferior cerebellar peduncle (right) on FA (fractional anisotropy) skeleton (from dMRI data)	Inferior cerebellar peduncle	33875891	31355	0	0	European
IDP_dMRI_TBSS_ISOVF_Medial_lemniscus_L_PMID33875891	Brain dMRI	WM tract ISOVF	Mean ISOVF (isotropic or free water volume fraction) in medial lemniscus (left) on FA (fractional anisotropy) skeleton (from dMRI data)	Medial lemniscus	33875891	31355	0	0	European
IDP_dMRI_TBSS_ISOVF_Medial_lemniscus_R_PMID33875891	Brain dMRI	WM tract ISOVF	Mean ISOVF (isotropic or free water volume fraction) in medial lemniscus (right) on FA (fractional anisotropy) skeleton (from dMRI data)	Medial lemniscus	33875891	31355	0	0	European
IDP_dMRI_TBSS_ISOVF_Middle_cerebellar_peduncle_PMID33875891	Brain dMRI	WM tract ISOVF	Mean ISOVF (isotropic or free water volume fraction) in middle cerebellar peduncle on FA (fractional anisotropy) skeleton (from dMRI data)	Middle cerebellar peduncle	33875891	31355	0	0	European
IDP_dMRI_TBSS_ISOVF_Pontine_crossing_tract_PMID33875891	Brain dMRI	WM tract ISOVF	Mean ISOVF (isotropic or free water volume fraction) in pontine crossing tract on FA (fractional anisotropy) skeleton (from dMRI data)	Pontine crossing tract	33875891	31355	0	0	European
IDP_dMRI_TBSS_ISOVF_Posterior_corona_radiata_L_PMID33875891	Brain dMRI	WM tract ISOVF	Mean ISOVF (isotropic or free water volume fraction) in posterior corona radiata (left) on FA (fractional anisotropy) skeleton (from dMRI data)	Posterior corona radiata	33875891	31355	0	0	European
IDP_dMRI_TBSS_ISOVF_Posterior_corona_radiata_R_PMID33875891	Brain dMRI	WM tract ISOVF	Mean ISOVF (isotropic or free water volume fraction) in posterior corona radiata (right) on FA (fractional anisotropy) skeleton (from dMRI data)	Posterior corona radiata	33875891	31355	0	0	European
IDP_dMRI_TBSS_ISOVF_Posterior_limb_of_internal_capsule_L_PMID33875891	Brain dMRI	WM tract ISOVF	Mean ISOVF (isotropic or free water volume fraction) in posterior limb of internal capsule (left) on FA (fractional anisotropy) skeleton (from dMRI da	Posterior limb of internal capsule	33875891	31355	0	0	European
IDP_dMRI_TBSS_ISOVF_Posterior_limb_of_internal_capsule_R_PMID33875891	Brain dMRI	WM tract ISOVF	Mean ISOVF (isotropic or free water volume fraction) in posterior limb of internal capsule (right) on FA (fractional anisotropy) skeleton (from dMRI d	Posterior limb of internal capsule	33875891	31355	0	0	European
IDP_dMRI_TBSS_ISOVF_Posterior_thalamic_radiation_L_PMID33875891	Brain dMRI	WM tract ISOVF	Mean ISOVF (isotropic or free water volume fraction) in posterior thalamic radiation (left) on FA (fractional anisotropy) skeleton (from dMRI data)	Posterior thalamic radiation	33875891	31355	0	0	European
IDP_dMRI_TBSS_ISOVF_Posterior_thalamic_radiation_R_PMID33875891	Brain dMRI	WM tract ISOVF	Mean ISOVF (isotropic or free water volume fraction) in posterior thalamic radiation (right) on FA (fractional anisotropy) skeleton (from dMRI data)	Posterior thalamic radiation	33875891	31355	0	0	European
IDP_dMRI_TBSS_ISOVF_Retrolenticular_part_of_internal_capsule_L_PMID33875891	Brain dMRI	WM tract ISOVF	Mean ISOVF (isotropic or free water volume fraction) in retrolenticular part of internal capsule (left) on FA (fractional anisotropy) skeleton (from d	Retrolenticular part of internal capsule	33875891	31355	0	0	European
IDP_dMRI_TBSS_ISOVF_Retrolenticular_part_of_internal_capsule_R_PMID33875891	Brain dMRI	WM tract ISOVF	Mean ISOVF (isotropic or free water volume fraction) in retrolenticular part of internal capsule (right) on FA (fractional anisotropy) skeleton (from	Retrolenticular part of internal capsule	33875891	31355	0	0	European
IDP_dMRI_TBSS_ISOVF_Sagittal_stratum_L_PMID33875891	Brain dMRI	WM tract ISOVF	Mean ISOVF (isotropic or free water volume fraction) in sagittal stratum (left) on FA (fractional anisotropy) skeleton (from dMRI data)	Sagittal stratum	33875891	31355	0	0	European
IDP_dMRI_TBSS_ISOVF_Sagittal_stratum_R_PMID33875891	Brain dMRI	WM tract ISOVF	Mean ISOVF (isotropic or free water volume fraction) in sagittal stratum (right) on FA (fractional anisotropy) skeleton (from dMRI data)	Sagittal stratum	33875891	31355	0	0	European
IDP_dMRI_TBSS_ISOVF_Splenium_of_corpus_callosum_PMID33875891	Brain dMRI	WM tract ISOVF	Mean ISOVF (isotropic or free water volume fraction) in splenium of corpus callosum on FA (fractional anisotropy) skeleton (from dMRI data)	Splenium of corpus callosum	33875891	31355	0	0	European
IDP_dMRI_TBSS_ISOVF_Superior_cerebellar_peduncle_L_PMID33875891	Brain dMRI	WM tract ISOVF	Mean ISOVF (isotropic or free water volume fraction) in superior cerebellar peduncle (left) on FA (fractional anisotropy) skeleton (from dMRI data)	Superior cerebellar peduncle	33875891	31355	0	0	European
IDP_dMRI_TBSS_ISOVF_Superior_cerebellar_peduncle_R_PMID33875891	Brain dMRI	WM tract ISOVF	Mean ISOVF (isotropic or free water volume fraction) in superior cerebellar peduncle (right) on FA (fractional anisotropy) skeleton (from dMRI data)	Superior cerebellar peduncle	33875891	31355	0	0	European
IDP_dMRI_TBSS_ISOVF_Superior_corona_radiata_L_PMID33875891	Brain dMRI	WM tract ISOVF	Mean ISOVF (isotropic or free water volume fraction) in superior corona radiata (left) on FA (fractional anisotropy) skeleton (from dMRI data)	Superior corona radiata	33875891	31355	0	0	European
IDP_dMRI_TBSS_ISOVF_Superior_corona_radiata_R_PMID33875891	Brain dMRI	WM tract ISOVF	Mean ISOVF (isotropic or free water volume fraction) in superior corona radiata (right) on FA (fractional anisotropy) skeleton (from dMRI data)	Superior corona radiata	33875891	31355	0	0	European
IDP_dMRI_TBSS_ISOVF_Superior_fronto_occipital_fasciculus_L_PMID33875891	Brain dMRI	WM tract ISOVF	Mean ISOVF (isotropic or free water volume fraction) in superior fronto-occipital fasciculus (left) on FA (fractional anisotropy) skeleton (from dMRI	Superior fronto-occipital fasciculus	33875891	31355	0	0	European
IDP_dMRI_TBSS_ISOVF_Superior_fronto_occipital_fasciculus_R_PMID33875891	Brain dMRI	WM tract ISOVF	Mean ISOVF (isotropic or free water volume fraction) in superior fronto-occipital fasciculus (right) on FA (fractional anisotropy) skeleton (from dMRI	Superior fronto-occipital fasciculus	33875891	31355	0	0	European
IDP_dMRI_TBSS_ISOVF_Superior_longitudinal_fasciculus_L_PMID33875891	Brain dMRI	WM tract ISOVF	Mean ISOVF (isotropic or free water volume fraction) in superior longitudinal fasciculus (left) on FA (fractional anisotropy) skeleton (from dMRI data	Superior longitudinal fasciculus	33875891	31355	0	0	European
IDP_dMRI_TBSS_ISOVF_Superior_longitudinal_fasciculus_R_PMID33875891	Brain dMRI	WM tract ISOVF	Mean ISOVF (isotropic or free water volume fraction) in superior longitudinal fasciculus (right) on FA (fractional anisotropy) skeleton (from dMRI dat	Superior longitudinal fasciculus	33875891	31355	0	0	European
IDP_dMRI_TBSS_ISOVF_Tapetum_L_PMID33875891	Brain dMRI	WM tract ISOVF	Mean ISOVF (isotropic or free water volume fraction) in tapetum (left) on FA (fractional anisotropy) skeleton (from dMRI data)	Tapetum	33875891	31355	0	0	European
IDP_dMRI_TBSS_ISOVF_Tapetum_R_PMID33875891	Brain dMRI	WM tract ISOVF	Mean ISOVF (isotropic or free water volume fraction) in tapetum (right) on FA (fractional anisotropy) skeleton (from dMRI data)	Tapetum	33875891	31355	0	0	European
IDP_dMRI_TBSS_ISOVF_Uncinate_fasciculus_L_PMID33875891	Brain dMRI	WM tract ISOVF	Mean ISOVF (isotropic or free water volume fraction) in uncinate fasciculus (left) on FA (fractional anisotropy) skeleton (from dMRI data)	Uncinate fasciculus	33875891	31355	0	0	European
IDP_dMRI_TBSS_ISOVF_Uncinate_fasciculus_R_PMID33875891	Brain dMRI	WM tract ISOVF	Mean ISOVF (isotropic or free water volume fraction) in uncinate fasciculus (right) on FA (fractional anisotropy) skeleton (from dMRI data)	Uncinate fasciculus	33875891	31355	0	0	European
IDP_dMRI_TBSS_L1_Anterior_corona_radiata_L_PMID33875891	Brain dMRI	WM tract diffusivity	Mean L1 in anterior corona radiata (left) on FA (fractional anisotropy) skeleton (from dMRI data)	Anterior corona radiata	33875891	31356	0	0	European
IDP_dMRI_TBSS_L1_Anterior_corona_radiata_R_PMID33875891	Brain dMRI	WM tract diffusivity	Mean L1 in anterior corona radiata (right) on FA (fractional anisotropy) skeleton (from dMRI data)	Anterior corona radiata	33875891	31356	0	0	European
IDP_dMRI_TBSS_L1_Anterior_limb_of_internal_capsule_L_PMID33875891	Brain dMRI	WM tract diffusivity	Mean L1 in anterior limb of internal capsule (left) on FA (fractional anisotropy) skeleton (from dMRI data)	Anterior limb of internal capsule	33875891	31356	0	0	European
IDP_dMRI_TBSS_L1_Anterior_limb_of_internal_capsule_R_PMID33875891	Brain dMRI	WM tract diffusivity	Mean L1 in anterior limb of internal capsule (right) on FA (fractional anisotropy) skeleton (from dMRI data)	Anterior limb of internal capsule	33875891	31356	0	0	European
IDP_dMRI_TBSS_L1_Body_of_corpus_callosum_PMID33875891	Brain dMRI	WM tract diffusivity	Mean L1 in body of corpus callosum on FA (fractional anisotropy) skeleton (from dMRI data)	Body of corpus callosum	33875891	31356	0	0	European
IDP_dMRI_TBSS_L1_Cerebral_peduncle_L_PMID33875891	Brain dMRI	WM tract diffusivity	Mean L1 in cerebral peduncle (left) on FA (fractional anisotropy) skeleton (from dMRI data)	Cerebral peduncle	33875891	31356	0	0	European
IDP_dMRI_TBSS_L1_Cerebral_peduncle_R_PMID33875891	Brain dMRI	WM tract diffusivity	Mean L1 in cerebral peduncle (right) on FA (fractional anisotropy) skeleton (from dMRI data)	Cerebral peduncle	33875891	31356	0	0	European
IDP_dMRI_TBSS_L1_Cingulum_cingulate_gyrus_L_PMID33875891	Brain dMRI	WM tract diffusivity	Mean L1 in cingulum cingulate gyrus (left) on FA (fractional anisotropy) skeleton (from dMRI data)	Cingulum Cingulate gyrus	33875891	31356	0	0	European
IDP_dMRI_TBSS_L1_Cingulum_cingulate_gyrus_R_PMID33875891	Brain dMRI	WM tract diffusivity	Mean L1 in cingulum cingulate gyrus (right) on FA (fractional anisotropy) skeleton (from dMRI data)	Cingulum Cingulate gyrus	33875891	31356	0	0	European
IDP_dMRI_TBSS_L1_Cingulum_hippocampus_L_PMID33875891	Brain dMRI	WM tract diffusivity	Mean L1 in cingulum hippocampus (left) on FA (fractional anisotropy) skeleton (from dMRI data)	Cingulum Hippocampus	33875891	31356	0	0	European
IDP_dMRI_TBSS_L1_Cingulum_hippocampus_R_PMID33875891	Brain dMRI	WM tract diffusivity	Mean L1 in cingulum hippocampus (right) on FA (fractional anisotropy) skeleton (from dMRI data)	Cingulum Hippocampus	33875891	31356	0	0	European
IDP_dMRI_TBSS_L1_Corticospinal_tract_L_PMID33875891	Brain dMRI	WM tract diffusivity	Mean L1 in corticospinal tract (left) on FA (fractional anisotropy) skeleton (from dMRI data)	Corticospinal tract	33875891	31356	0	0	European
IDP_dMRI_TBSS_L1_Corticospinal_tract_R_PMID33875891	Brain dMRI	WM tract diffusivity	Mean L1 in corticospinal tract (right) on FA (fractional anisotropy) skeleton (from dMRI data)	Corticospinal tract	33875891	31356	0	0	European
IDP_dMRI_TBSS_L1_External_capsule_L_PMID33875891	Brain dMRI	WM tract diffusivity	Mean L1 in external capsule (left) on FA (fractional anisotropy) skeleton (from dMRI data)	External capsule	33875891	31356	0	0	European
IDP_dMRI_TBSS_L1_External_capsule_R_PMID33875891	Brain dMRI	WM tract diffusivity	Mean L1 in external capsule (right) on FA (fractional anisotropy) skeleton (from dMRI data)	External capsule	33875891	31356	0	0	European
IDP_dMRI_TBSS_L1_Fornix_cres_Stria_terminalis_L_PMID33875891	Brain dMRI	WM tract diffusivity	Mean L1 in fornix cres+stria terminalis (left) on FA (fractional anisotropy) skeleton (from dMRI data)	Fornix cres+stria terminalis	33875891	31356	0	0	European
IDP_dMRI_TBSS_L1_Fornix_cres_Stria_terminalis_R_PMID33875891	Brain dMRI	WM tract diffusivity	Mean L1 in fornix cres+stria terminalis (right) on FA (fractional anisotropy) skeleton (from dMRI data)	Fornix cres+stria terminalis	33875891	31356	0	0	European
IDP_dMRI_TBSS_L1_Fornix_PMID33875891	Brain dMRI	WM tract diffusivity	Mean L1 in fornix on FA (fractional anisotropy) skeleton (from dMRI data)	Fornix	33875891	31356	0	0	European
IDP_dMRI_TBSS_L1_Genu_of_corpus_callosum_PMID33875891	Brain dMRI	WM tract diffusivity	Mean L1 in genu of corpus callosum on FA (fractional anisotropy) skeleton (from dMRI data)	Genu of corpus callosum	33875891	31356	0	0	European
IDP_dMRI_TBSS_L1_Inferior_cerebellar_peduncle_L_PMID33875891	Brain dMRI	WM tract diffusivity	Mean L1 in inferior cerebellar peduncle (left) on FA (fractional anisotropy) skeleton (from dMRI data)	Inferior cerebellar peduncle	33875891	31356	0	0	European
IDP_dMRI_TBSS_L1_Inferior_cerebellar_peduncle_R_PMID33875891	Brain dMRI	WM tract diffusivity	Mean L1 in inferior cerebellar peduncle (right) on FA (fractional anisotropy) skeleton (from dMRI data)	Inferior cerebellar peduncle	33875891	31356	0	0	European
IDP_dMRI_TBSS_L1_Medial_lemniscus_L_PMID33875891	Brain dMRI	WM tract diffusivity	Mean L1 in medial lemniscus (left) on FA (fractional anisotropy) skeleton (from dMRI data)	Medial lemniscus	33875891	31356	0	0	European
IDP_dMRI_TBSS_L1_Medial_lemniscus_R_PMID33875891	Brain dMRI	WM tract diffusivity	Mean L1 in medial lemniscus (right) on FA (fractional anisotropy) skeleton (from dMRI data)	Medial lemniscus	33875891	31356	0	0	European
IDP_dMRI_TBSS_L1_Middle_cerebellar_peduncle_PMID33875891	Brain dMRI	WM tract diffusivity	Mean L1 in middle cerebellar peduncle on FA (fractional anisotropy) skeleton (from dMRI data)	Middle cerebellar peduncle	33875891	31356	0	0	European
IDP_dMRI_TBSS_L1_Pontine_crossing_tract_PMID33875891	Brain dMRI	WM tract diffusivity	Mean L1 in pontine crossing tract on FA (fractional anisotropy) skeleton (from dMRI data)	Pontine crossing tract	33875891	31356	0	0	European
IDP_dMRI_TBSS_L1_Posterior_corona_radiata_L_PMID33875891	Brain dMRI	WM tract diffusivity	Mean L1 in posterior corona radiata (left) on FA (fractional anisotropy) skeleton (from dMRI data)	Posterior corona radiata	33875891	31356	0	0	European
IDP_dMRI_TBSS_L1_Posterior_corona_radiata_R_PMID33875891	Brain dMRI	WM tract diffusivity	Mean L1 in posterior corona radiata (right) on FA (fractional anisotropy) skeleton (from dMRI data)	Posterior corona radiata	33875891	31356	0	0	European
IDP_dMRI_TBSS_L1_Posterior_limb_of_internal_capsule_L_PMID33875891	Brain dMRI	WM tract diffusivity	Mean L1 in posterior limb of internal capsule (left) on FA (fractional anisotropy) skeleton (from dMRI data)	Posterior limb of internal capsule	33875891	31356	0	0	European
IDP_dMRI_TBSS_L1_Posterior_limb_of_internal_capsule_R_PMID33875891	Brain dMRI	WM tract diffusivity	Mean L1 in posterior limb of internal capsule (right) on FA (fractional anisotropy) skeleton (from dMRI data)	Posterior limb of internal capsule	33875891	31356	0	0	European
IDP_dMRI_TBSS_L1_Posterior_thalamic_radiation_L_PMID33875891	Brain dMRI	WM tract diffusivity	Mean L1 in posterior thalamic radiation (left) on FA (fractional anisotropy) skeleton (from dMRI data)	Posterior thalamic radiation	33875891	31356	0	0	European
IDP_dMRI_TBSS_L1_Posterior_thalamic_radiation_R_PMID33875891	Brain dMRI	WM tract diffusivity	Mean L1 in posterior thalamic radiation (right) on FA (fractional anisotropy) skeleton (from dMRI data)	Posterior thalamic radiation	33875891	31356	0	0	European
IDP_dMRI_TBSS_L1_Retrolenticular_part_of_internal_capsule_L_PMID33875891	Brain dMRI	WM tract diffusivity	Mean L1 in retrolenticular part of internal capsule (left) on FA (fractional anisotropy) skeleton (from dMRI data)	Retrolenticular part of internal capsule	33875891	31356	0	0	European
IDP_dMRI_TBSS_L1_Retrolenticular_part_of_internal_capsule_R_PMID33875891	Brain dMRI	WM tract diffusivity	Mean L1 in retrolenticular part of internal capsule (right) on FA (fractional anisotropy) skeleton (from dMRI data)	Retrolenticular part of internal capsule	33875891	31356	0	0	European
IDP_dMRI_TBSS_L1_Sagittal_stratum_L_PMID33875891	Brain dMRI	WM tract diffusivity	Mean L1 in sagittal stratum (left) on FA (fractional anisotropy) skeleton (from dMRI data)	Sagittal stratum	33875891	31356	0	0	European
IDP_dMRI_TBSS_L1_Sagittal_stratum_R_PMID33875891	Brain dMRI	WM tract diffusivity	Mean L1 in sagittal stratum (right) on FA (fractional anisotropy) skeleton (from dMRI data)	Sagittal stratum	33875891	31356	0	0	European
IDP_dMRI_TBSS_L1_Splenium_of_corpus_callosum_PMID33875891	Brain dMRI	WM tract diffusivity	Mean L1 in splenium of corpus callosum on FA (fractional anisotropy) skeleton (from dMRI data)	Splenium of corpus callosum	33875891	31356	0	0	European
IDP_dMRI_TBSS_L1_Superior_cerebellar_peduncle_L_PMID33875891	Brain dMRI	WM tract diffusivity	Mean L1 in superior cerebellar peduncle (left) on FA (fractional anisotropy) skeleton (from dMRI data)	Superior cerebellar peduncle	33875891	31356	0	0	European
IDP_dMRI_TBSS_L1_Superior_cerebellar_peduncle_R_PMID33875891	Brain dMRI	WM tract diffusivity	Mean L1 in superior cerebellar peduncle (right) on FA (fractional anisotropy) skeleton (from dMRI data)	Superior cerebellar peduncle	33875891	31356	0	0	European
IDP_dMRI_TBSS_L1_Superior_corona_radiata_L_PMID33875891	Brain dMRI	WM tract diffusivity	Mean L1 in superior corona radiata (left) on FA (fractional anisotropy) skeleton (from dMRI data)	Superior corona radiata	33875891	31356	0	0	European
IDP_dMRI_TBSS_L1_Superior_corona_radiata_R_PMID33875891	Brain dMRI	WM tract diffusivity	Mean L1 in superior corona radiata (right) on FA (fractional anisotropy) skeleton (from dMRI data)	Superior corona radiata	33875891	31356	0	0	European
IDP_dMRI_TBSS_L1_Superior_fronto_occipital_fasciculus_L_PMID33875891	Brain dMRI	WM tract diffusivity	Mean L1 in superior fronto-occipital fasciculus (left) on FA (fractional anisotropy) skeleton (from dMRI data)	Superior fronto-occipital fasciculus	33875891	31356	0	0	European
IDP_dMRI_TBSS_L1_Superior_fronto_occipital_fasciculus_R_PMID33875891	Brain dMRI	WM tract diffusivity	Mean L1 in superior fronto-occipital fasciculus (right) on FA (fractional anisotropy) skeleton (from dMRI data)	Superior fronto-occipital fasciculus	33875891	31356	0	0	European
IDP_dMRI_TBSS_L1_Superior_longitudinal_fasciculus_L_PMID33875891	Brain dMRI	WM tract diffusivity	Mean L1 in superior longitudinal fasciculus (left) on FA (fractional anisotropy) skeleton (from dMRI data)	Superior longitudinal fasciculus	33875891	31356	0	0	European
IDP_dMRI_TBSS_L1_Superior_longitudinal_fasciculus_R_PMID33875891	Brain dMRI	WM tract diffusivity	Mean L1 in superior longitudinal fasciculus (right) on FA (fractional anisotropy) skeleton (from dMRI data)	Superior longitudinal fasciculus	33875891	31356	0	0	European
IDP_dMRI_TBSS_L1_Tapetum_L_PMID33875891	Brain dMRI	WM tract diffusivity	Mean L1 in tapetum (left) on FA (fractional anisotropy) skeleton (from dMRI data)	Tapetum	33875891	31356	0	0	European
IDP_dMRI_TBSS_L1_Tapetum_R_PMID33875891	Brain dMRI	WM tract diffusivity	Mean L1 in tapetum (right) on FA (fractional anisotropy) skeleton (from dMRI data)	Tapetum	33875891	31356	0	0	European
IDP_dMRI_TBSS_L1_Uncinate_fasciculus_L_PMID33875891	Brain dMRI	WM tract diffusivity	Mean L1 in uncinate fasciculus (left) on FA (fractional anisotropy) skeleton (from dMRI data)	Uncinate fasciculus	33875891	31356	0	0	European
IDP_dMRI_TBSS_L1_Uncinate_fasciculus_R_PMID33875891	Brain dMRI	WM tract diffusivity	Mean L1 in uncinate fasciculus (right) on FA (fractional anisotropy) skeleton (from dMRI data)	Uncinate fasciculus	33875891	31356	0	0	European
IDP_dMRI_TBSS_L2_Anterior_corona_radiata_L_PMID33875891	Brain dMRI	WM tract diffusivity	Mean L2 in anterior corona radiata (left) on FA (fractional anisotropy) skeleton (from dMRI data)	Anterior corona radiata	33875891	31356	0	0	European
IDP_dMRI_TBSS_L2_Anterior_corona_radiata_R_PMID33875891	Brain dMRI	WM tract diffusivity	Mean L2 in anterior corona radiata (right) on FA (fractional anisotropy) skeleton (from dMRI data)	Anterior corona radiata	33875891	31356	0	0	European
IDP_dMRI_TBSS_L2_Anterior_limb_of_internal_capsule_L_PMID33875891	Brain dMRI	WM tract diffusivity	Mean L2 in anterior limb of internal capsule (left) on FA (fractional anisotropy) skeleton (from dMRI data)	Anterior limb of internal capsule	33875891	31356	0	0	European
IDP_dMRI_TBSS_L2_Anterior_limb_of_internal_capsule_R_PMID33875891	Brain dMRI	WM tract diffusivity	Mean L2 in anterior limb of internal capsule (right) on FA (fractional anisotropy) skeleton (from dMRI data)	Anterior limb of internal capsule	33875891	31356	0	0	European
IDP_dMRI_TBSS_L2_Body_of_corpus_callosum_PMID33875891	Brain dMRI	WM tract diffusivity	Mean L2 in body of corpus callosum on FA (fractional anisotropy) skeleton (from dMRI data)	Body of corpus callosum	33875891	31356	0	0	European
IDP_dMRI_TBSS_L2_Cerebral_peduncle_L_PMID33875891	Brain dMRI	WM tract diffusivity	Mean L2 in cerebral peduncle (left) on FA (fractional anisotropy) skeleton (from dMRI data)	Cerebral peduncle	33875891	31356	0	0	European
IDP_dMRI_TBSS_L2_Cerebral_peduncle_R_PMID33875891	Brain dMRI	WM tract diffusivity	Mean L2 in cerebral peduncle (right) on FA (fractional anisotropy) skeleton (from dMRI data)	Cerebral peduncle	33875891	31356	0	0	European
IDP_dMRI_TBSS_L2_Cingulum_cingulate_gyrus_L_PMID33875891	Brain dMRI	WM tract diffusivity	Mean L2 in cingulum cingulate gyrus (left) on FA (fractional anisotropy) skeleton (from dMRI data)	Cingulum Cingulate gyrus	33875891	31356	0	0	European
IDP_dMRI_TBSS_L2_Cingulum_cingulate_gyrus_R_PMID33875891	Brain dMRI	WM tract diffusivity	Mean L2 in cingulum cingulate gyrus (right) on FA (fractional anisotropy) skeleton (from dMRI data)	Cingulum Cingulate gyrus	33875891	31356	0	0	European
IDP_dMRI_TBSS_L2_Cingulum_hippocampus_L_PMID33875891	Brain dMRI	WM tract diffusivity	Mean L2 in cingulum hippocampus (left) on FA (fractional anisotropy) skeleton (from dMRI data)	Cingulum Hippocampus	33875891	31356	0	0	European
IDP_dMRI_TBSS_L2_Cingulum_hippocampus_R_PMID33875891	Brain dMRI	WM tract diffusivity	Mean L2 in cingulum hippocampus (right) on FA (fractional anisotropy) skeleton (from dMRI data)	Cingulum Hippocampus	33875891	31356	0	0	European
IDP_dMRI_TBSS_L2_Corticospinal_tract_L_PMID33875891	Brain dMRI	WM tract diffusivity	Mean L2 in corticospinal tract (left) on FA (fractional anisotropy) skeleton (from dMRI data)	Corticospinal tract	33875891	31356	0	0	European
IDP_dMRI_TBSS_L2_Corticospinal_tract_R_PMID33875891	Brain dMRI	WM tract diffusivity	Mean L2 in corticospinal tract (right) on FA (fractional anisotropy) skeleton (from dMRI data)	Corticospinal tract	33875891	31356	0	0	European
IDP_dMRI_TBSS_L2_External_capsule_L_PMID33875891	Brain dMRI	WM tract diffusivity	Mean L2 in external capsule (left) on FA (fractional anisotropy) skeleton (from dMRI data)	External capsule	33875891	31356	0	0	European
IDP_dMRI_TBSS_L2_External_capsule_R_PMID33875891	Brain dMRI	WM tract diffusivity	Mean L2 in external capsule (right) on FA (fractional anisotropy) skeleton (from dMRI data)	External capsule	33875891	31356	0	0	European
IDP_dMRI_TBSS_L2_Fornix_cres_Stria_terminalis_L_PMID33875891	Brain dMRI	WM tract diffusivity	Mean L2 in fornix cres+stria terminalis (left) on FA (fractional anisotropy) skeleton (from dMRI data)	Fornix cres+stria terminalis	33875891	31356	0	0	European
IDP_dMRI_TBSS_L2_Fornix_cres_Stria_terminalis_R_PMID33875891	Brain dMRI	WM tract diffusivity	Mean L2 in fornix cres+stria terminalis (right) on FA (fractional anisotropy) skeleton (from dMRI data)	Fornix cres+stria terminalis	33875891	31356	0	0	European
IDP_dMRI_TBSS_L2_Fornix_PMID33875891	Brain dMRI	WM tract diffusivity	Mean L2 in fornix on FA (fractional anisotropy) skeleton (from dMRI data)	Fornix	33875891	31356	0	0	European
IDP_dMRI_TBSS_L2_Genu_of_corpus_callosum_PMID33875891	Brain dMRI	WM tract diffusivity	Mean L2 in genu of corpus callosum on FA (fractional anisotropy) skeleton (from dMRI data)	Genu of corpus callosum	33875891	31356	0	0	European
IDP_dMRI_TBSS_L2_Inferior_cerebellar_peduncle_L_PMID33875891	Brain dMRI	WM tract diffusivity	Mean L2 in inferior cerebellar peduncle (left) on FA (fractional anisotropy) skeleton (from dMRI data)	Inferior cerebellar peduncle	33875891	31356	0	0	European
IDP_dMRI_TBSS_L2_Inferior_cerebellar_peduncle_R_PMID33875891	Brain dMRI	WM tract diffusivity	Mean L2 in inferior cerebellar peduncle (right) on FA (fractional anisotropy) skeleton (from dMRI data)	Inferior cerebellar peduncle	33875891	31356	0	0	European
IDP_dMRI_TBSS_L2_Medial_lemniscus_L_PMID33875891	Brain dMRI	WM tract diffusivity	Mean L2 in medial lemniscus (left) on FA (fractional anisotropy) skeleton (from dMRI data)	Medial lemniscus	33875891	31356	0	0	European
IDP_dMRI_TBSS_L2_Medial_lemniscus_R_PMID33875891	Brain dMRI	WM tract diffusivity	Mean L2 in medial lemniscus (right) on FA (fractional anisotropy) skeleton (from dMRI data)	Medial lemniscus	33875891	31356	0	0	European
IDP_dMRI_TBSS_L2_Middle_cerebellar_peduncle_PMID33875891	Brain dMRI	WM tract diffusivity	Mean L2 in middle cerebellar peduncle on FA (fractional anisotropy) skeleton (from dMRI data)	Middle cerebellar peduncle	33875891	31356	0	0	European
IDP_dMRI_TBSS_L2_Pontine_crossing_tract_PMID33875891	Brain dMRI	WM tract diffusivity	Mean L2 in pontine crossing tract on FA (fractional anisotropy) skeleton (from dMRI data)	Pontine crossing tract	33875891	31356	0	0	European
IDP_dMRI_TBSS_L2_Posterior_corona_radiata_L_PMID33875891	Brain dMRI	WM tract diffusivity	Mean L2 in posterior corona radiata (left) on FA (fractional anisotropy) skeleton (from dMRI data)	Posterior corona radiata	33875891	31356	0	0	European
IDP_dMRI_TBSS_L2_Posterior_corona_radiata_R_PMID33875891	Brain dMRI	WM tract diffusivity	Mean L2 in posterior corona radiata (right) on FA (fractional anisotropy) skeleton (from dMRI data)	Posterior corona radiata	33875891	31356	0	0	European
IDP_dMRI_TBSS_L2_Posterior_limb_of_internal_capsule_L_PMID33875891	Brain dMRI	WM tract diffusivity	Mean L2 in posterior limb of internal capsule (left) on FA (fractional anisotropy) skeleton (from dMRI data)	Posterior limb of internal capsule	33875891	31356	0	0	European
IDP_dMRI_TBSS_L2_Posterior_limb_of_internal_capsule_R_PMID33875891	Brain dMRI	WM tract diffusivity	Mean L2 in posterior limb of internal capsule (right) on FA (fractional anisotropy) skeleton (from dMRI data)	Posterior limb of internal capsule	33875891	31356	0	0	European
IDP_dMRI_TBSS_L2_Posterior_thalamic_radiation_L_PMID33875891	Brain dMRI	WM tract diffusivity	Mean L2 in posterior thalamic radiation (left) on FA (fractional anisotropy) skeleton (from dMRI data)	Posterior thalamic radiation	33875891	31356	0	0	European
IDP_dMRI_TBSS_L2_Posterior_thalamic_radiation_R_PMID33875891	Brain dMRI	WM tract diffusivity	Mean L2 in posterior thalamic radiation (right) on FA (fractional anisotropy) skeleton (from dMRI data)	Posterior thalamic radiation	33875891	31356	0	0	European
IDP_dMRI_TBSS_L2_Retrolenticular_part_of_internal_capsule_L_PMID33875891	Brain dMRI	WM tract diffusivity	Mean L2 in retrolenticular part of internal capsule (left) on FA (fractional anisotropy) skeleton (from dMRI data)	Retrolenticular part of internal capsule	33875891	31356	0	0	European
IDP_dMRI_TBSS_L2_Retrolenticular_part_of_internal_capsule_R_PMID33875891	Brain dMRI	WM tract diffusivity	Mean L2 in retrolenticular part of internal capsule (right) on FA (fractional anisotropy) skeleton (from dMRI data)	Retrolenticular part of internal capsule	33875891	31356	0	0	European
IDP_dMRI_TBSS_L2_Sagittal_stratum_L_PMID33875891	Brain dMRI	WM tract diffusivity	Mean L2 in sagittal stratum (left) on FA (fractional anisotropy) skeleton (from dMRI data)	Sagittal stratum	33875891	31356	0	0	European
IDP_dMRI_TBSS_L2_Sagittal_stratum_R_PMID33875891	Brain dMRI	WM tract diffusivity	Mean L2 in sagittal stratum (right) on FA (fractional anisotropy) skeleton (from dMRI data)	Sagittal stratum	33875891	31356	0	0	European
IDP_dMRI_TBSS_L2_Splenium_of_corpus_callosum_PMID33875891	Brain dMRI	WM tract diffusivity	Mean L2 in splenium of corpus callosum on FA (fractional anisotropy) skeleton (from dMRI data)	Splenium of corpus callosum	33875891	31356	0	0	European
IDP_dMRI_TBSS_L2_Superior_cerebellar_peduncle_L_PMID33875891	Brain dMRI	WM tract diffusivity	Mean L2 in superior cerebellar peduncle (left) on FA (fractional anisotropy) skeleton (from dMRI data)	Superior cerebellar peduncle	33875891	31356	0	0	European
IDP_dMRI_TBSS_L2_Superior_cerebellar_peduncle_R_PMID33875891	Brain dMRI	WM tract diffusivity	Mean L2 in superior cerebellar peduncle (right) on FA (fractional anisotropy) skeleton (from dMRI data)	Superior cerebellar peduncle	33875891	31356	0	0	European
IDP_dMRI_TBSS_L2_Superior_corona_radiata_L_PMID33875891	Brain dMRI	WM tract diffusivity	Mean L2 in superior corona radiata (left) on FA (fractional anisotropy) skeleton (from dMRI data)	Superior corona radiata	33875891	31356	0	0	European
IDP_dMRI_TBSS_L2_Superior_corona_radiata_R_PMID33875891	Brain dMRI	WM tract diffusivity	Mean L2 in superior corona radiata (right) on FA (fractional anisotropy) skeleton (from dMRI data)	Superior corona radiata	33875891	31356	0	0	European
IDP_dMRI_TBSS_L2_Superior_fronto_occipital_fasciculus_L_PMID33875891	Brain dMRI	WM tract diffusivity	Mean L2 in superior fronto-occipital fasciculus (left) on FA (fractional anisotropy) skeleton (from dMRI data)	Superior fronto-occipital fasciculus	33875891	31356	0	0	European
IDP_dMRI_TBSS_L2_Superior_fronto_occipital_fasciculus_R_PMID33875891	Brain dMRI	WM tract diffusivity	Mean L2 in superior fronto-occipital fasciculus (right) on FA (fractional anisotropy) skeleton (from dMRI data)	Superior fronto-occipital fasciculus	33875891	31356	0	0	European
IDP_dMRI_TBSS_L2_Superior_longitudinal_fasciculus_L_PMID33875891	Brain dMRI	WM tract diffusivity	Mean L2 in superior longitudinal fasciculus (left) on FA (fractional anisotropy) skeleton (from dMRI data)	Superior longitudinal fasciculus	33875891	31356	0	0	European
IDP_dMRI_TBSS_L2_Superior_longitudinal_fasciculus_R_PMID33875891	Brain dMRI	WM tract diffusivity	Mean L2 in superior longitudinal fasciculus (right) on FA (fractional anisotropy) skeleton (from dMRI data)	Superior longitudinal fasciculus	33875891	31356	0	0	European
IDP_dMRI_TBSS_L2_Tapetum_L_PMID33875891	Brain dMRI	WM tract diffusivity	Mean L2 in tapetum (left) on FA (fractional anisotropy) skeleton (from dMRI data)	Tapetum	33875891	31356	0	0	European
IDP_dMRI_TBSS_L2_Tapetum_R_PMID33875891	Brain dMRI	WM tract diffusivity	Mean L2 in tapetum (right) on FA (fractional anisotropy) skeleton (from dMRI data)	Tapetum	33875891	31356	0	0	European
IDP_dMRI_TBSS_L2_Uncinate_fasciculus_L_PMID33875891	Brain dMRI	WM tract diffusivity	Mean L2 in uncinate fasciculus (left) on FA (fractional anisotropy) skeleton (from dMRI data)	Uncinate fasciculus	33875891	31356	0	0	European
IDP_dMRI_TBSS_L2_Uncinate_fasciculus_R_PMID33875891	Brain dMRI	WM tract diffusivity	Mean L2 in uncinate fasciculus (right) on FA (fractional anisotropy) skeleton (from dMRI data)	Uncinate fasciculus	33875891	31356	0	0	European
IDP_dMRI_TBSS_L3_Anterior_corona_radiata_L_PMID33875891	Brain dMRI	WM tract diffusivity	Mean L3 in anterior corona radiata (left) on FA (fractional anisotropy) skeleton (from dMRI data)	Anterior corona radiata	33875891	31356	0	0	European
IDP_dMRI_TBSS_L3_Anterior_corona_radiata_R_PMID33875891	Brain dMRI	WM tract diffusivity	Mean L3 in anterior corona radiata (right) on FA (fractional anisotropy) skeleton (from dMRI data)	Anterior corona radiata	33875891	31356	0	0	European
IDP_dMRI_TBSS_L3_Anterior_limb_of_internal_capsule_L_PMID33875891	Brain dMRI	WM tract diffusivity	Mean L3 in anterior limb of internal capsule (left) on FA (fractional anisotropy) skeleton (from dMRI data)	Anterior limb of internal capsule	33875891	31356	0	0	European
IDP_dMRI_TBSS_L3_Anterior_limb_of_internal_capsule_R_PMID33875891	Brain dMRI	WM tract diffusivity	Mean L3 in anterior limb of internal capsule (right) on FA (fractional anisotropy) skeleton (from dMRI data)	Anterior limb of internal capsule	33875891	31356	0	0	European
IDP_dMRI_TBSS_L3_Body_of_corpus_callosum_PMID33875891	Brain dMRI	WM tract diffusivity	Mean L3 in body of corpus callosum on FA (fractional anisotropy) skeleton (from dMRI data)	Body of corpus callosum	33875891	31356	0	0	European
IDP_dMRI_TBSS_L3_Cerebral_peduncle_L_PMID33875891	Brain dMRI	WM tract diffusivity	Mean L3 in cerebral peduncle (left) on FA (fractional anisotropy) skeleton (from dMRI data)	Cerebral peduncle	33875891	31356	0	0	European
IDP_dMRI_TBSS_L3_Cerebral_peduncle_R_PMID33875891	Brain dMRI	WM tract diffusivity	Mean L3 in cerebral peduncle (right) on FA (fractional anisotropy) skeleton (from dMRI data)	Cerebral peduncle	33875891	31356	0	0	European
IDP_dMRI_TBSS_L3_Cingulum_cingulate_gyrus_L_PMID33875891	Brain dMRI	WM tract diffusivity	Mean L3 in cingulum cingulate gyrus (left) on FA (fractional anisotropy) skeleton (from dMRI data)	Cingulum Cingulate gyrus	33875891	31356	0	0	European
IDP_dMRI_TBSS_L3_Cingulum_cingulate_gyrus_R_PMID33875891	Brain dMRI	WM tract diffusivity	Mean L3 in cingulum cingulate gyrus (right) on FA (fractional anisotropy) skeleton (from dMRI data)	Cingulum Cingulate gyrus	33875891	31356	0	0	European
IDP_dMRI_TBSS_L3_Cingulum_hippocampus_L_PMID33875891	Brain dMRI	WM tract diffusivity	Mean L3 in cingulum hippocampus (left) on FA (fractional anisotropy) skeleton (from dMRI data)	Cingulum Hippocampus	33875891	31356	0	0	European
IDP_dMRI_TBSS_L3_Cingulum_hippocampus_R_PMID33875891	Brain dMRI	WM tract diffusivity	Mean L3 in cingulum hippocampus (right) on FA (fractional anisotropy) skeleton (from dMRI data)	Cingulum Hippocampus	33875891	31356	0	0	European
IDP_dMRI_TBSS_L3_Corticospinal_tract_L_PMID33875891	Brain dMRI	WM tract diffusivity	Mean L3 in corticospinal tract (left) on FA (fractional anisotropy) skeleton (from dMRI data)	Corticospinal tract	33875891	31356	0	0	European
IDP_dMRI_TBSS_L3_Corticospinal_tract_R_PMID33875891	Brain dMRI	WM tract diffusivity	Mean L3 in corticospinal tract (right) on FA (fractional anisotropy) skeleton (from dMRI data)	Corticospinal tract	33875891	31356	0	0	European
IDP_dMRI_TBSS_L3_External_capsule_L_PMID33875891	Brain dMRI	WM tract diffusivity	Mean L3 in external capsule (left) on FA (fractional anisotropy) skeleton (from dMRI data)	External capsule	33875891	31356	0	0	European
IDP_dMRI_TBSS_L3_External_capsule_R_PMID33875891	Brain dMRI	WM tract diffusivity	Mean L3 in external capsule (right) on FA (fractional anisotropy) skeleton (from dMRI data)	External capsule	33875891	31356	0	0	European
IDP_dMRI_TBSS_L3_Fornix_cres_Stria_terminalis_L_PMID33875891	Brain dMRI	WM tract diffusivity	Mean L3 in fornix cres+stria terminalis (left) on FA (fractional anisotropy) skeleton (from dMRI data)	Fornix cres+stria terminalis	33875891	31356	0	0	European
IDP_dMRI_TBSS_L3_Fornix_cres_Stria_terminalis_R_PMID33875891	Brain dMRI	WM tract diffusivity	Mean L3 in fornix cres+stria terminalis (right) on FA (fractional anisotropy) skeleton (from dMRI data)	Fornix cres+stria terminalis	33875891	31356	0	0	European
IDP_dMRI_TBSS_L3_Fornix_PMID33875891	Brain dMRI	WM tract diffusivity	Mean L3 in fornix on FA (fractional anisotropy) skeleton (from dMRI data)	Fornix	33875891	31356	0	0	European
IDP_dMRI_TBSS_L3_Genu_of_corpus_callosum_PMID33875891	Brain dMRI	WM tract diffusivity	Mean L3 in genu of corpus callosum on FA (fractional anisotropy) skeleton (from dMRI data)	Genu of corpus callosum	33875891	31356	0	0	European
IDP_dMRI_TBSS_L3_Inferior_cerebellar_peduncle_L_PMID33875891	Brain dMRI	WM tract diffusivity	Mean L3 in inferior cerebellar peduncle (left) on FA (fractional anisotropy) skeleton (from dMRI data)	Inferior cerebellar peduncle	33875891	31356	0	0	European
IDP_dMRI_TBSS_L3_Inferior_cerebellar_peduncle_R_PMID33875891	Brain dMRI	WM tract diffusivity	Mean L3 in inferior cerebellar peduncle (right) on FA (fractional anisotropy) skeleton (from dMRI data)	Inferior cerebellar peduncle	33875891	31356	0	0	European
IDP_dMRI_TBSS_L3_Medial_lemniscus_L_PMID33875891	Brain dMRI	WM tract diffusivity	Mean L3 in medial lemniscus (left) on FA (fractional anisotropy) skeleton (from dMRI data)	Medial lemniscus	33875891	31356	0	0	European
IDP_dMRI_TBSS_L3_Medial_lemniscus_R_PMID33875891	Brain dMRI	WM tract diffusivity	Mean L3 in medial lemniscus (right) on FA (fractional anisotropy) skeleton (from dMRI data)	Medial lemniscus	33875891	31356	0	0	European
IDP_dMRI_TBSS_L3_Middle_cerebellar_peduncle_PMID33875891	Brain dMRI	WM tract diffusivity	Mean L3 in middle cerebellar peduncle on FA (fractional anisotropy) skeleton (from dMRI data)	Middle cerebellar peduncle	33875891	31356	0	0	European
IDP_dMRI_TBSS_L3_Pontine_crossing_tract_PMID33875891	Brain dMRI	WM tract diffusivity	Mean L3 in pontine crossing tract on FA (fractional anisotropy) skeleton (from dMRI data)	Pontine crossing tract	33875891	31356	0	0	European
IDP_dMRI_TBSS_L3_Posterior_corona_radiata_L_PMID33875891	Brain dMRI	WM tract diffusivity	Mean L3 in posterior corona radiata (left) on FA (fractional anisotropy) skeleton (from dMRI data)	Posterior corona radiata	33875891	31356	0	0	European
IDP_dMRI_TBSS_L3_Posterior_corona_radiata_R_PMID33875891	Brain dMRI	WM tract diffusivity	Mean L3 in posterior corona radiata (right) on FA (fractional anisotropy) skeleton (from dMRI data)	Posterior corona radiata	33875891	31356	0	0	European
IDP_dMRI_TBSS_L3_Posterior_limb_of_internal_capsule_L_PMID33875891	Brain dMRI	WM tract diffusivity	Mean L3 in posterior limb of internal capsule (left) on FA (fractional anisotropy) skeleton (from dMRI data)	Posterior limb of internal capsule	33875891	31356	0	0	European
IDP_dMRI_TBSS_L3_Posterior_limb_of_internal_capsule_R_PMID33875891	Brain dMRI	WM tract diffusivity	Mean L3 in posterior limb of internal capsule (right) on FA (fractional anisotropy) skeleton (from dMRI data)	Posterior limb of internal capsule	33875891	31356	0	0	European
IDP_dMRI_TBSS_L3_Posterior_thalamic_radiation_L_PMID33875891	Brain dMRI	WM tract diffusivity	Mean L3 in posterior thalamic radiation (left) on FA (fractional anisotropy) skeleton (from dMRI data)	Posterior thalamic radiation	33875891	31356	0	0	European
IDP_dMRI_TBSS_L3_Posterior_thalamic_radiation_R_PMID33875891	Brain dMRI	WM tract diffusivity	Mean L3 in posterior thalamic radiation (right) on FA (fractional anisotropy) skeleton (from dMRI data)	Posterior thalamic radiation	33875891	31356	0	0	European
IDP_dMRI_TBSS_L3_Retrolenticular_part_of_internal_capsule_L_PMID33875891	Brain dMRI	WM tract diffusivity	Mean L3 in retrolenticular part of internal capsule (left) on FA (fractional anisotropy) skeleton (from dMRI data)	Retrolenticular part of internal capsule	33875891	31356	0	0	European
IDP_dMRI_TBSS_L3_Retrolenticular_part_of_internal_capsule_R_PMID33875891	Brain dMRI	WM tract diffusivity	Mean L3 in retrolenticular part of internal capsule (right) on FA (fractional anisotropy) skeleton (from dMRI data)	Retrolenticular part of internal capsule	33875891	31356	0	0	European
IDP_dMRI_TBSS_L3_Sagittal_stratum_L_PMID33875891	Brain dMRI	WM tract diffusivity	Mean L3 in sagittal stratum (left) on FA (fractional anisotropy) skeleton (from dMRI data)	Sagittal stratum	33875891	31356	0	0	European
IDP_dMRI_TBSS_L3_Sagittal_stratum_R_PMID33875891	Brain dMRI	WM tract diffusivity	Mean L3 in sagittal stratum (right) on FA (fractional anisotropy) skeleton (from dMRI data)	Sagittal stratum	33875891	31356	0	0	European
IDP_dMRI_TBSS_L3_Splenium_of_corpus_callosum_PMID33875891	Brain dMRI	WM tract diffusivity	Mean L3 in splenium of corpus callosum on FA (fractional anisotropy) skeleton (from dMRI data)	Splenium of corpus callosum	33875891	31356	0	0	European
IDP_dMRI_TBSS_L3_Superior_cerebellar_peduncle_L_PMID33875891	Brain dMRI	WM tract diffusivity	Mean L3 in superior cerebellar peduncle (left) on FA (fractional anisotropy) skeleton (from dMRI data)	Superior cerebellar peduncle	33875891	31356	0	0	European
IDP_dMRI_TBSS_L3_Superior_cerebellar_peduncle_R_PMID33875891	Brain dMRI	WM tract diffusivity	Mean L3 in superior cerebellar peduncle (right) on FA (fractional anisotropy) skeleton (from dMRI data)	Superior cerebellar peduncle	33875891	31356	0	0	European
IDP_dMRI_TBSS_L3_Superior_corona_radiata_L_PMID33875891	Brain dMRI	WM tract diffusivity	Mean L3 in superior corona radiata (left) on FA (fractional anisotropy) skeleton (from dMRI data)	Superior corona radiata	33875891	31356	0	0	European
IDP_dMRI_TBSS_L3_Superior_corona_radiata_R_PMID33875891	Brain dMRI	WM tract diffusivity	Mean L3 in superior corona radiata (right) on FA (fractional anisotropy) skeleton (from dMRI data)	Superior corona radiata	33875891	31356	0	0	European
IDP_dMRI_TBSS_L3_Superior_fronto_occipital_fasciculus_L_PMID33875891	Brain dMRI	WM tract diffusivity	Mean L3 in superior fronto-occipital fasciculus (left) on FA (fractional anisotropy) skeleton (from dMRI data)	Superior fronto-occipital fasciculus	33875891	31356	0	0	European
IDP_dMRI_TBSS_L3_Superior_fronto_occipital_fasciculus_R_PMID33875891	Brain dMRI	WM tract diffusivity	Mean L3 in superior fronto-occipital fasciculus (right) on FA (fractional anisotropy) skeleton (from dMRI data)	Superior fronto-occipital fasciculus	33875891	31356	0	0	European
IDP_dMRI_TBSS_L3_Superior_longitudinal_fasciculus_L_PMID33875891	Brain dMRI	WM tract diffusivity	Mean L3 in superior longitudinal fasciculus (left) on FA (fractional anisotropy) skeleton (from dMRI data)	Superior longitudinal fasciculus	33875891	31356	0	0	European
IDP_dMRI_TBSS_L3_Superior_longitudinal_fasciculus_R_PMID33875891	Brain dMRI	WM tract diffusivity	Mean L3 in superior longitudinal fasciculus (right) on FA (fractional anisotropy) skeleton (from dMRI data)	Superior longitudinal fasciculus	33875891	31356	0	0	European
IDP_dMRI_TBSS_L3_Tapetum_L_PMID33875891	Brain dMRI	WM tract diffusivity	Mean L3 in tapetum (left) on FA (fractional anisotropy) skeleton (from dMRI data)	Tapetum	33875891	31356	0	0	European
IDP_dMRI_TBSS_L3_Tapetum_R_PMID33875891	Brain dMRI	WM tract diffusivity	Mean L3 in tapetum (right) on FA (fractional anisotropy) skeleton (from dMRI data)	Tapetum	33875891	31356	0	0	European
IDP_dMRI_TBSS_L3_Uncinate_fasciculus_L_PMID33875891	Brain dMRI	WM tract diffusivity	Mean L3 in uncinate fasciculus (left) on FA (fractional anisotropy) skeleton (from dMRI data)	Uncinate fasciculus	33875891	31356	0	0	European
IDP_dMRI_TBSS_L3_Uncinate_fasciculus_R_PMID33875891	Brain dMRI	WM tract diffusivity	Mean L3 in uncinate fasciculus (right) on FA (fractional anisotropy) skeleton (from dMRI data)	Uncinate fasciculus	33875891	31356	0	0	European
IDP_dMRI_TBSS_MD_Anterior_corona_radiata_L_PMID33875891	Brain dMRI	WM tract diffusivity	Mean MD (mean diffusivity) in anterior corona radiata (left) on FA (fractional anisotropy) skeleton (from dMRI data)	Anterior corona radiata	33875891	31356	0	0	European
IDP_dMRI_TBSS_MD_Anterior_corona_radiata_R_PMID33875891	Brain dMRI	WM tract diffusivity	Mean MD (mean diffusivity) in anterior corona radiata (right) on FA (fractional anisotropy) skeleton (from dMRI data)	Anterior corona radiata	33875891	31356	0	0	European
IDP_dMRI_TBSS_MD_Anterior_limb_of_internal_capsule_L_PMID33875891	Brain dMRI	WM tract diffusivity	Mean MD (mean diffusivity) in anterior limb of internal capsule (left) on FA (fractional anisotropy) skeleton (from dMRI data)	Anterior limb of internal capsule	33875891	31356	0	0	European
IDP_dMRI_TBSS_MD_Anterior_limb_of_internal_capsule_R_PMID33875891	Brain dMRI	WM tract diffusivity	Mean MD (mean diffusivity) in anterior limb of internal capsule (right) on FA (fractional anisotropy) skeleton (from dMRI data)	Anterior limb of internal capsule	33875891	31356	0	0	European
IDP_dMRI_TBSS_MD_Body_of_corpus_callosum_PMID33875891	Brain dMRI	WM tract diffusivity	Mean MD (mean diffusivity) in body of corpus callosum on FA (fractional anisotropy) skeleton (from dMRI data)	Body of corpus callosum	33875891	31356	0	0	European
IDP_dMRI_TBSS_MD_Cerebral_peduncle_L_PMID33875891	Brain dMRI	WM tract diffusivity	Mean MD (mean diffusivity) in cerebral peduncle (left) on FA (fractional anisotropy) skeleton (from dMRI data)	Cerebral peduncle	33875891	31356	0	0	European
IDP_dMRI_TBSS_MD_Cerebral_peduncle_R_PMID33875891	Brain dMRI	WM tract diffusivity	Mean MD (mean diffusivity) in cerebral peduncle (right) on FA (fractional anisotropy) skeleton (from dMRI data)	Cerebral peduncle	33875891	31356	0	0	European
IDP_dMRI_TBSS_MD_Cingulum_cingulate_gyrus_L_PMID33875891	Brain dMRI	WM tract diffusivity	Mean MD (mean diffusivity) in cingulum cingulate gyrus (left) on FA (fractional anisotropy) skeleton (from dMRI data)	Cingulum Cingulate gyrus	33875891	31356	0	0	European
IDP_dMRI_TBSS_MD_Cingulum_cingulate_gyrus_R_PMID33875891	Brain dMRI	WM tract diffusivity	Mean MD (mean diffusivity) in cingulum cingulate gyrus (right) on FA (fractional anisotropy) skeleton (from dMRI data)	Cingulum Cingulate gyrus	33875891	31356	0	0	European
IDP_dMRI_TBSS_MD_Cingulum_hippocampus_L_PMID33875891	Brain dMRI	WM tract diffusivity	Mean MD (mean diffusivity) in cingulum hippocampus (left) on FA (fractional anisotropy) skeleton (from dMRI data)	Cingulum Hippocampus	33875891	31356	0	0	European
IDP_dMRI_TBSS_MD_Cingulum_hippocampus_R_PMID33875891	Brain dMRI	WM tract diffusivity	Mean MD (mean diffusivity) in cingulum hippocampus (right) on FA (fractional anisotropy) skeleton (from dMRI data)	Cingulum Hippocampus	33875891	31356	0	0	European
IDP_dMRI_TBSS_MD_Corticospinal_tract_L_PMID33875891	Brain dMRI	WM tract diffusivity	Mean MD (mean diffusivity) in corticospinal tract (left) on FA (fractional anisotropy) skeleton (from dMRI data)	Corticospinal tract	33875891	31356	0	0	European
IDP_dMRI_TBSS_MD_Corticospinal_tract_R_PMID33875891	Brain dMRI	WM tract diffusivity	Mean MD (mean diffusivity) in corticospinal tract (right) on FA (fractional anisotropy) skeleton (from dMRI data)	Corticospinal tract	33875891	31356	0	0	European
IDP_dMRI_TBSS_MD_External_capsule_L_PMID33875891	Brain dMRI	WM tract diffusivity	Mean MD (mean diffusivity) in external capsule (left) on FA (fractional anisotropy) skeleton (from dMRI data)	External capsule	33875891	31356	0	0	European
IDP_dMRI_TBSS_MD_External_capsule_R_PMID33875891	Brain dMRI	WM tract diffusivity	Mean MD (mean diffusivity) in external capsule (right) on FA (fractional anisotropy) skeleton (from dMRI data)	External capsule	33875891	31356	0	0	European
IDP_dMRI_TBSS_MD_Fornix_cres_Stria_terminalis_L_PMID33875891	Brain dMRI	WM tract diffusivity	Mean MD (mean diffusivity) in fornix cres+stria terminalis (left) on FA (fractional anisotropy) skeleton (from dMRI data)	Fornix cres+stria terminalis	33875891	31356	0	0	European
IDP_dMRI_TBSS_MD_Fornix_cres_Stria_terminalis_R_PMID33875891	Brain dMRI	WM tract diffusivity	Mean MD (mean diffusivity) in fornix cres+stria terminalis (right) on FA (fractional anisotropy) skeleton (from dMRI data)	Fornix cres+stria terminalis	33875891	31356	0	0	European
IDP_dMRI_TBSS_MD_Fornix_PMID33875891	Brain dMRI	WM tract diffusivity	Mean MD (mean diffusivity) in fornix on FA (fractional anisotropy) skeleton (from dMRI data)	Fornix	33875891	31356	0	0	European
IDP_dMRI_TBSS_MD_Genu_of_corpus_callosum_PMID33875891	Brain dMRI	WM tract diffusivity	Mean MD (mean diffusivity) in genu of corpus callosum on FA (fractional anisotropy) skeleton (from dMRI data)	Genu of corpus callosum	33875891	31356	0	0	European
IDP_dMRI_TBSS_MD_Inferior_cerebellar_peduncle_L_PMID33875891	Brain dMRI	WM tract diffusivity	Mean MD (mean diffusivity) in inferior cerebellar peduncle (left) on FA (fractional anisotropy) skeleton (from dMRI data)	Inferior cerebellar peduncle	33875891	31356	0	0	European
IDP_dMRI_TBSS_MD_Inferior_cerebellar_peduncle_R_PMID33875891	Brain dMRI	WM tract diffusivity	Mean MD (mean diffusivity) in inferior cerebellar peduncle (right) on FA (fractional anisotropy) skeleton (from dMRI data)	Inferior cerebellar peduncle	33875891	31356	0	0	European
IDP_dMRI_TBSS_MD_Medial_lemniscus_L_PMID33875891	Brain dMRI	WM tract diffusivity	Mean MD (mean diffusivity) in medial lemniscus (left) on FA (fractional anisotropy) skeleton (from dMRI data)	Medial lemniscus	33875891	31356	0	0	European
IDP_dMRI_TBSS_MD_Medial_lemniscus_R_PMID33875891	Brain dMRI	WM tract diffusivity	Mean MD (mean diffusivity) in medial lemniscus (right) on FA (fractional anisotropy) skeleton (from dMRI data)	Medial lemniscus	33875891	31356	0	0	European
IDP_dMRI_TBSS_MD_Middle_cerebellar_peduncle_PMID33875891	Brain dMRI	WM tract diffusivity	Mean MD (mean diffusivity) in middle cerebellar peduncle on FA (fractional anisotropy) skeleton (from dMRI data)	Middle cerebellar peduncle	33875891	31356	0	0	European
IDP_dMRI_TBSS_MD_Pontine_crossing_tract_PMID33875891	Brain dMRI	WM tract diffusivity	Mean MD (mean diffusivity) in pontine crossing tract on FA (fractional anisotropy) skeleton (from dMRI data)	Pontine crossing tract	33875891	31356	0	0	European
IDP_dMRI_TBSS_MD_Posterior_corona_radiata_L_PMID33875891	Brain dMRI	WM tract diffusivity	Mean MD (mean diffusivity) in posterior corona radiata (left) on FA (fractional anisotropy) skeleton (from dMRI data)	Posterior corona radiata	33875891	31356	0	0	European
IDP_dMRI_TBSS_MD_Posterior_corona_radiata_R_PMID33875891	Brain dMRI	WM tract diffusivity	Mean MD (mean diffusivity) in posterior corona radiata (right) on FA (fractional anisotropy) skeleton (from dMRI data)	Posterior corona radiata	33875891	31356	0	0	European
IDP_dMRI_TBSS_MD_Posterior_limb_of_internal_capsule_L_PMID33875891	Brain dMRI	WM tract diffusivity	Mean MD (mean diffusivity) in posterior limb of internal capsule (left) on FA (fractional anisotropy) skeleton (from dMRI data)	Posterior limb of internal capsule	33875891	31356	0	0	European
IDP_dMRI_TBSS_MD_Posterior_limb_of_internal_capsule_R_PMID33875891	Brain dMRI	WM tract diffusivity	Mean MD (mean diffusivity) in posterior limb of internal capsule (right) on FA (fractional anisotropy) skeleton (from dMRI data)	Posterior limb of internal capsule	33875891	31356	0	0	European
IDP_dMRI_TBSS_MD_Posterior_thalamic_radiation_L_PMID33875891	Brain dMRI	WM tract diffusivity	Mean MD (mean diffusivity) in posterior thalamic radiation (left) on FA (fractional anisotropy) skeleton (from dMRI data)	Posterior thalamic radiation	33875891	31356	0	0	European
IDP_dMRI_TBSS_MD_Posterior_thalamic_radiation_R_PMID33875891	Brain dMRI	WM tract diffusivity	Mean MD (mean diffusivity) in posterior thalamic radiation (right) on FA (fractional anisotropy) skeleton (from dMRI data)	Posterior thalamic radiation	33875891	31356	0	0	European
IDP_dMRI_TBSS_MD_Retrolenticular_part_of_internal_capsule_L_PMID33875891	Brain dMRI	WM tract diffusivity	Mean MD (mean diffusivity) in retrolenticular part of internal capsule (left) on FA (fractional anisotropy) skeleton (from dMRI data)	Retrolenticular part of internal capsule	33875891	31356	0	0	European
IDP_dMRI_TBSS_MD_Retrolenticular_part_of_internal_capsule_R_PMID33875891	Brain dMRI	WM tract diffusivity	Mean MD (mean diffusivity) in retrolenticular part of internal capsule (right) on FA (fractional anisotropy) skeleton (from dMRI data)	Retrolenticular part of internal capsule	33875891	31356	0	0	European
IDP_dMRI_TBSS_MD_Sagittal_stratum_L_PMID33875891	Brain dMRI	WM tract diffusivity	Mean MD (mean diffusivity) in sagittal stratum (left) on FA (fractional anisotropy) skeleton (from dMRI data)	Sagittal stratum	33875891	31356	0	0	European
IDP_dMRI_TBSS_MD_Sagittal_stratum_R_PMID33875891	Brain dMRI	WM tract diffusivity	Mean MD (mean diffusivity) in sagittal stratum (right) on FA (fractional anisotropy) skeleton (from dMRI data)	Sagittal stratum	33875891	31356	0	0	European
IDP_dMRI_TBSS_MD_Splenium_of_corpus_callosum_PMID33875891	Brain dMRI	WM tract diffusivity	Mean MD (mean diffusivity) in splenium of corpus callosum on FA (fractional anisotropy) skeleton (from dMRI data)	Splenium of corpus callosum	33875891	31356	0	0	European
IDP_dMRI_TBSS_MD_Superior_cerebellar_peduncle_L_PMID33875891	Brain dMRI	WM tract diffusivity	Mean MD (mean diffusivity) in superior cerebellar peduncle (left) on FA (fractional anisotropy) skeleton (from dMRI data)	Superior cerebellar peduncle	33875891	31356	0	0	European
IDP_dMRI_TBSS_MD_Superior_cerebellar_peduncle_R_PMID33875891	Brain dMRI	WM tract diffusivity	Mean MD (mean diffusivity) in superior cerebellar peduncle (right) on FA (fractional anisotropy) skeleton (from dMRI data)	Superior cerebellar peduncle	33875891	31356	0	0	European
IDP_dMRI_TBSS_MD_Superior_corona_radiata_L_PMID33875891	Brain dMRI	WM tract diffusivity	Mean MD (mean diffusivity) in superior corona radiata (left) on FA (fractional anisotropy) skeleton (from dMRI data)	Superior corona radiata	33875891	31356	0	0	European
IDP_dMRI_TBSS_MD_Superior_corona_radiata_R_PMID33875891	Brain dMRI	WM tract diffusivity	Mean MD (mean diffusivity) in superior corona radiata (right) on FA (fractional anisotropy) skeleton (from dMRI data)	Superior corona radiata	33875891	31356	0	0	European
IDP_dMRI_TBSS_MD_Superior_fronto_occipital_fasciculus_L_PMID33875891	Brain dMRI	WM tract diffusivity	Mean MD (mean diffusivity) in superior fronto-occipital fasciculus (left) on FA (fractional anisotropy) skeleton (from dMRI data)	Superior fronto-occipital fasciculus	33875891	31356	0	0	European
IDP_dMRI_TBSS_MD_Superior_fronto_occipital_fasciculus_R_PMID33875891	Brain dMRI	WM tract diffusivity	Mean MD (mean diffusivity) in superior fronto-occipital fasciculus (right) on FA (fractional anisotropy) skeleton (from dMRI data)	Superior fronto-occipital fasciculus	33875891	31356	0	0	European
IDP_dMRI_TBSS_MD_Superior_longitudinal_fasciculus_L_PMID33875891	Brain dMRI	WM tract diffusivity	Mean MD (mean diffusivity) in superior longitudinal fasciculus (left) on FA (fractional anisotropy) skeleton (from dMRI data)	Superior longitudinal fasciculus	33875891	31356	0	0	European
IDP_dMRI_TBSS_MD_Superior_longitudinal_fasciculus_R_PMID33875891	Brain dMRI	WM tract diffusivity	Mean MD (mean diffusivity) in superior longitudinal fasciculus (right) on FA (fractional anisotropy) skeleton (from dMRI data)	Superior longitudinal fasciculus	33875891	31356	0	0	European
IDP_dMRI_TBSS_MD_Tapetum_L_PMID33875891	Brain dMRI	WM tract diffusivity	Mean MD (mean diffusivity) in tapetum (left) on FA (fractional anisotropy) skeleton (from dMRI data)	Tapetum	33875891	31356	0	0	European
IDP_dMRI_TBSS_MD_Tapetum_R_PMID33875891	Brain dMRI	WM tract diffusivity	Mean MD (mean diffusivity) in tapetum (right) on FA (fractional anisotropy) skeleton (from dMRI data)	Tapetum	33875891	31356	0	0	European
IDP_dMRI_TBSS_MD_Uncinate_fasciculus_L_PMID33875891	Brain dMRI	WM tract diffusivity	Mean MD (mean diffusivity) in uncinate fasciculus (left) on FA (fractional anisotropy) skeleton (from dMRI data)	Uncinate fasciculus	33875891	31356	0	0	European
IDP_dMRI_TBSS_MD_Uncinate_fasciculus_R_PMID33875891	Brain dMRI	WM tract diffusivity	Mean MD (mean diffusivity) in uncinate fasciculus (right) on FA (fractional anisotropy) skeleton (from dMRI data)	Uncinate fasciculus	33875891	31356	0	0	European
IDP_dMRI_TBSS_MO_Anterior_corona_radiata_L_PMID33875891	Brain dMRI	WM tract MO	Mean MO (diffusion tensor mode) in anterior corona radiata (left) on FA (fractional anisotropy) skeleton (from dMRI data)	Anterior corona radiata	33875891	31356	0	0	European
IDP_dMRI_TBSS_MO_Anterior_corona_radiata_R_PMID33875891	Brain dMRI	WM tract MO	Mean MO (diffusion tensor mode) in anterior corona radiata (right) on FA (fractional anisotropy) skeleton (from dMRI data)	Anterior corona radiata	33875891	31356	0	0	European
IDP_dMRI_TBSS_MO_Anterior_limb_of_internal_capsule_L_PMID33875891	Brain dMRI	WM tract MO	Mean MO (diffusion tensor mode) in anterior limb of internal capsule (left) on FA (fractional anisotropy) skeleton (from dMRI data)	Anterior limb of internal capsule	33875891	31356	0	0	European
IDP_dMRI_TBSS_MO_Anterior_limb_of_internal_capsule_R_PMID33875891	Brain dMRI	WM tract MO	Mean MO (diffusion tensor mode) in anterior limb of internal capsule (right) on FA (fractional anisotropy) skeleton (from dMRI data)	Anterior limb of internal capsule	33875891	31356	0	0	European
IDP_dMRI_TBSS_MO_Body_of_corpus_callosum_PMID33875891	Brain dMRI	WM tract MO	Mean MO (diffusion tensor mode) in body of corpus callosum on FA (fractional anisotropy) skeleton (from dMRI data)	Body of corpus callosum	33875891	31356	0	0	European
IDP_dMRI_TBSS_MO_Cerebral_peduncle_L_PMID33875891	Brain dMRI	WM tract MO	Mean MO (diffusion tensor mode) in cerebral peduncle (left) on FA (fractional anisotropy) skeleton (from dMRI data)	Cerebral peduncle	33875891	31356	0	0	European
IDP_dMRI_TBSS_MO_Cerebral_peduncle_R_PMID33875891	Brain dMRI	WM tract MO	Mean MO (diffusion tensor mode) in cerebral peduncle (right) on FA (fractional anisotropy) skeleton (from dMRI data)	Cerebral peduncle	33875891	31356	0	0	European
IDP_dMRI_TBSS_MO_Cingulum_cingulate_gyrus_L_PMID33875891	Brain dMRI	WM tract MO	Mean MO (diffusion tensor mode) in cingulum cingulate gyrus (left) on FA (fractional anisotropy) skeleton (from dMRI data)	Cingulum Cingulate gyrus	33875891	31356	0	0	European
IDP_dMRI_TBSS_MO_Cingulum_cingulate_gyrus_R_PMID33875891	Brain dMRI	WM tract MO	Mean MO (diffusion tensor mode) in cingulum cingulate gyrus (right) on FA (fractional anisotropy) skeleton (from dMRI data)	Cingulum Cingulate gyrus	33875891	31356	0	0	European
IDP_dMRI_TBSS_MO_Cingulum_hippocampus_L_PMID33875891	Brain dMRI	WM tract MO	Mean MO (diffusion tensor mode) in cingulum hippocampus (left) on FA (fractional anisotropy) skeleton (from dMRI data)	Cingulum Hippocampus	33875891	31356	0	0	European
IDP_dMRI_TBSS_MO_Cingulum_hippocampus_R_PMID33875891	Brain dMRI	WM tract MO	Mean MO (diffusion tensor mode) in cingulum hippocampus (right) on FA (fractional anisotropy) skeleton (from dMRI data)	Cingulum Hippocampus	33875891	31356	0	0	European
IDP_dMRI_TBSS_MO_Corticospinal_tract_L_PMID33875891	Brain dMRI	WM tract MO	Mean MO (diffusion tensor mode) in corticospinal tract (left) on FA (fractional anisotropy) skeleton (from dMRI data)	Corticospinal tract	33875891	31356	0	0	European
IDP_dMRI_TBSS_MO_Corticospinal_tract_R_PMID33875891	Brain dMRI	WM tract MO	Mean MO (diffusion tensor mode) in corticospinal tract (right) on FA (fractional anisotropy) skeleton (from dMRI data)	Corticospinal tract	33875891	31356	0	0	European
IDP_dMRI_TBSS_MO_External_capsule_L_PMID33875891	Brain dMRI	WM tract MO	Mean MO (diffusion tensor mode) in external capsule (left) on FA (fractional anisotropy) skeleton (from dMRI data)	External capsule	33875891	31356	0	0	European
IDP_dMRI_TBSS_MO_External_capsule_R_PMID33875891	Brain dMRI	WM tract MO	Mean MO (diffusion tensor mode) in external capsule (right) on FA (fractional anisotropy) skeleton (from dMRI data)	External capsule	33875891	31356	0	0	European
IDP_dMRI_TBSS_MO_Fornix_cres_Stria_terminalis_L_PMID33875891	Brain dMRI	WM tract MO	Mean MO (diffusion tensor mode) in fornix cres+stria terminalis (left) on FA (fractional anisotropy) skeleton (from dMRI data)	Fornix cres+stria terminalis	33875891	31356	0	0	European
IDP_dMRI_TBSS_MO_Fornix_cres_Stria_terminalis_R_PMID33875891	Brain dMRI	WM tract MO	Mean MO (diffusion tensor mode) in fornix cres+stria terminalis (right) on FA (fractional anisotropy) skeleton (from dMRI data)	Fornix cres+stria terminalis	33875891	31356	0	0	European
IDP_dMRI_TBSS_MO_Fornix_PMID33875891	Brain dMRI	WM tract MO	Mean MO (diffusion tensor mode) in fornix on FA (fractional anisotropy) skeleton (from dMRI data)	Fornix	33875891	31356	0	0	European
IDP_dMRI_TBSS_MO_Genu_of_corpus_callosum_PMID33875891	Brain dMRI	WM tract MO	Mean MO (diffusion tensor mode) in genu of corpus callosum on FA (fractional anisotropy) skeleton (from dMRI data)	Genu of corpus callosum	33875891	31356	0	0	European
IDP_dMRI_TBSS_MO_Inferior_cerebellar_peduncle_L_PMID33875891	Brain dMRI	WM tract MO	Mean MO (diffusion tensor mode) in inferior cerebellar peduncle (left) on FA (fractional anisotropy) skeleton (from dMRI data)	Inferior cerebellar peduncle	33875891	31356	0	0	European
IDP_dMRI_TBSS_MO_Inferior_cerebellar_peduncle_R_PMID33875891	Brain dMRI	WM tract MO	Mean MO (diffusion tensor mode) in inferior cerebellar peduncle (right) on FA (fractional anisotropy) skeleton (from dMRI data)	Inferior cerebellar peduncle	33875891	31356	0	0	European
IDP_dMRI_TBSS_MO_Medial_lemniscus_L_PMID33875891	Brain dMRI	WM tract MO	Mean MO (diffusion tensor mode) in medial lemniscus (left) on FA (fractional anisotropy) skeleton (from dMRI data)	Medial lemniscus	33875891	31356	0	0	European
IDP_dMRI_TBSS_MO_Medial_lemniscus_R_PMID33875891	Brain dMRI	WM tract MO	Mean MO (diffusion tensor mode) in medial lemniscus (right) on FA (fractional anisotropy) skeleton (from dMRI data)	Medial lemniscus	33875891	31356	0	0	European
IDP_dMRI_TBSS_MO_Middle_cerebellar_peduncle_PMID33875891	Brain dMRI	WM tract MO	Mean MO (diffusion tensor mode) in middle cerebellar peduncle on FA (fractional anisotropy) skeleton (from dMRI data)	Middle cerebellar peduncle	33875891	31356	0	0	European
IDP_dMRI_TBSS_MO_Pontine_crossing_tract_PMID33875891	Brain dMRI	WM tract MO	Mean MO (diffusion tensor mode) in pontine crossing tract on FA (fractional anisotropy) skeleton (from dMRI data)	Pontine crossing tract	33875891	31356	0	0	European
IDP_dMRI_TBSS_MO_Posterior_corona_radiata_L_PMID33875891	Brain dMRI	WM tract MO	Mean MO (diffusion tensor mode) in posterior corona radiata (left) on FA (fractional anisotropy) skeleton (from dMRI data)	Posterior corona radiata	33875891	31356	0	0	European
IDP_dMRI_TBSS_MO_Posterior_corona_radiata_R_PMID33875891	Brain dMRI	WM tract MO	Mean MO (diffusion tensor mode) in posterior corona radiata (right) on FA (fractional anisotropy) skeleton (from dMRI data)	Posterior corona radiata	33875891	31356	0	0	European
IDP_dMRI_TBSS_MO_Posterior_limb_of_internal_capsule_L_PMID33875891	Brain dMRI	WM tract MO	Mean MO (diffusion tensor mode) in posterior limb of internal capsule (left) on FA (fractional anisotropy) skeleton (from dMRI data)	Posterior limb of internal capsule	33875891	31356	0	0	European
IDP_dMRI_TBSS_MO_Posterior_limb_of_internal_capsule_R_PMID33875891	Brain dMRI	WM tract MO	Mean MO (diffusion tensor mode) in posterior limb of internal capsule (right) on FA (fractional anisotropy) skeleton (from dMRI data)	Posterior limb of internal capsule	33875891	31356	0	0	European
IDP_dMRI_TBSS_MO_Posterior_thalamic_radiation_L_PMID33875891	Brain dMRI	WM tract MO	Mean MO (diffusion tensor mode) in posterior thalamic radiation (left) on FA (fractional anisotropy) skeleton (from dMRI data)	Posterior thalamic radiation	33875891	31356	0	0	European
IDP_dMRI_TBSS_MO_Posterior_thalamic_radiation_R_PMID33875891	Brain dMRI	WM tract MO	Mean MO (diffusion tensor mode) in posterior thalamic radiation (right) on FA (fractional anisotropy) skeleton (from dMRI data)	Posterior thalamic radiation	33875891	31356	0	0	European
IDP_dMRI_TBSS_MO_Retrolenticular_part_of_internal_capsule_L_PMID33875891	Brain dMRI	WM tract MO	Mean MO (diffusion tensor mode) in retrolenticular part of internal capsule (left) on FA (fractional anisotropy) skeleton (from dMRI data)	Retrolenticular part of internal capsule	33875891	31356	0	0	European
IDP_dMRI_TBSS_MO_Retrolenticular_part_of_internal_capsule_R_PMID33875891	Brain dMRI	WM tract MO	Mean MO (diffusion tensor mode) in retrolenticular part of internal capsule (right) on FA (fractional anisotropy) skeleton (from dMRI data)	Retrolenticular part of internal capsule	33875891	31356	0	0	European
IDP_dMRI_TBSS_MO_Sagittal_stratum_L_PMID33875891	Brain dMRI	WM tract MO	Mean MO (diffusion tensor mode) in sagittal stratum (left) on FA (fractional anisotropy) skeleton (from dMRI data)	Sagittal stratum	33875891	31356	0	0	European
IDP_dMRI_TBSS_MO_Sagittal_stratum_R_PMID33875891	Brain dMRI	WM tract MO	Mean MO (diffusion tensor mode) in sagittal stratum (right) on FA (fractional anisotropy) skeleton (from dMRI data)	Sagittal stratum	33875891	31356	0	0	European
IDP_dMRI_TBSS_MO_Splenium_of_corpus_callosum_PMID33875891	Brain dMRI	WM tract MO	Mean MO (diffusion tensor mode) in splenium of corpus callosum on FA (fractional anisotropy) skeleton (from dMRI data)	Splenium of corpus callosum	33875891	31356	0	0	European
IDP_dMRI_TBSS_MO_Superior_cerebellar_peduncle_L_PMID33875891	Brain dMRI	WM tract MO	Mean MO (diffusion tensor mode) in superior cerebellar peduncle (left) on FA (fractional anisotropy) skeleton (from dMRI data)	Superior cerebellar peduncle	33875891	31356	0	0	European
IDP_dMRI_TBSS_MO_Superior_cerebellar_peduncle_R_PMID33875891	Brain dMRI	WM tract MO	Mean MO (diffusion tensor mode) in superior cerebellar peduncle (right) on FA (fractional anisotropy) skeleton (from dMRI data)	Superior cerebellar peduncle	33875891	31356	0	0	European
IDP_dMRI_TBSS_MO_Superior_corona_radiata_L_PMID33875891	Brain dMRI	WM tract MO	Mean MO (diffusion tensor mode) in superior corona radiata (left) on FA (fractional anisotropy) skeleton (from dMRI data)	Superior corona radiata	33875891	31356	0	0	European
IDP_dMRI_TBSS_MO_Superior_corona_radiata_R_PMID33875891	Brain dMRI	WM tract MO	Mean MO (diffusion tensor mode) in superior corona radiata (right) on FA (fractional anisotropy) skeleton (from dMRI data)	Superior corona radiata	33875891	31356	0	0	European
IDP_dMRI_TBSS_MO_Superior_fronto_occipital_fasciculus_L_PMID33875891	Brain dMRI	WM tract MO	Mean MO (diffusion tensor mode) in superior fronto-occipital fasciculus (left) on FA (fractional anisotropy) skeleton (from dMRI data)	Superior fronto-occipital fasciculus	33875891	31356	0	0	European
IDP_dMRI_TBSS_MO_Superior_fronto_occipital_fasciculus_R_PMID33875891	Brain dMRI	WM tract MO	Mean MO (diffusion tensor mode) in superior fronto-occipital fasciculus (right) on FA (fractional anisotropy) skeleton (from dMRI data)	Superior fronto-occipital fasciculus	33875891	31356	0	0	European
IDP_dMRI_TBSS_MO_Superior_longitudinal_fasciculus_L_PMID33875891	Brain dMRI	WM tract MO	Mean MO (diffusion tensor mode) in superior longitudinal fasciculus (left) on FA (fractional anisotropy) skeleton (from dMRI data)	Superior longitudinal fasciculus	33875891	31356	0	0	European
IDP_dMRI_TBSS_MO_Superior_longitudinal_fasciculus_R_PMID33875891	Brain dMRI	WM tract MO	Mean MO (diffusion tensor mode) in superior longitudinal fasciculus (right) on FA (fractional anisotropy) skeleton (from dMRI data)	Superior longitudinal fasciculus	33875891	31356	0	0	European
IDP_dMRI_TBSS_MO_Tapetum_L_PMID33875891	Brain dMRI	WM tract MO	Mean MO (diffusion tensor mode) in tapetum (left) on FA (fractional anisotropy) skeleton (from dMRI data)	Tapetum	33875891	31356	0	0	European
IDP_dMRI_TBSS_MO_Tapetum_R_PMID33875891	Brain dMRI	WM tract MO	Mean MO (diffusion tensor mode) in tapetum (right) on FA (fractional anisotropy) skeleton (from dMRI data)	Tapetum	33875891	31356	0	0	European
IDP_dMRI_TBSS_MO_Uncinate_fasciculus_L_PMID33875891	Brain dMRI	WM tract MO	Mean MO (diffusion tensor mode) in uncinate fasciculus (left) on FA (fractional anisotropy) skeleton (from dMRI data)	Uncinate fasciculus	33875891	31356	0	0	European
IDP_dMRI_TBSS_MO_Uncinate_fasciculus_R_PMID33875891	Brain dMRI	WM tract MO	Mean MO (diffusion tensor mode) in uncinate fasciculus (right) on FA (fractional anisotropy) skeleton (from dMRI data)	Uncinate fasciculus	33875891	31356	0	0	European
IDP_dMRI_TBSS_OD_Anterior_corona_radiata_L_PMID33875891	Brain dMRI	WM tract OD	Mean OD (orientation dispersion index) in anterior corona radiata (left) on FA (fractional anisotropy) skeleton (from dMRI data)	Anterior corona radiata	33875891	31355	0	0	European
IDP_dMRI_TBSS_OD_Anterior_corona_radiata_R_PMID33875891	Brain dMRI	WM tract OD	Mean OD (orientation dispersion index) in anterior corona radiata (right) on FA (fractional anisotropy) skeleton (from dMRI data)	Anterior corona radiata	33875891	31355	0	0	European
IDP_dMRI_TBSS_OD_Anterior_limb_of_internal_capsule_L_PMID33875891	Brain dMRI	WM tract OD	Mean OD (orientation dispersion index) in anterior limb of internal capsule (left) on FA (fractional anisotropy) skeleton (from dMRI data)	Anterior limb of internal capsule	33875891	31355	0	0	European
IDP_dMRI_TBSS_OD_Anterior_limb_of_internal_capsule_R_PMID33875891	Brain dMRI	WM tract OD	Mean OD (orientation dispersion index) in anterior limb of internal capsule (right) on FA (fractional anisotropy) skeleton (from dMRI data)	Anterior limb of internal capsule	33875891	31355	0	0	European
IDP_dMRI_TBSS_OD_Body_of_corpus_callosum_PMID33875891	Brain dMRI	WM tract OD	Mean OD (orientation dispersion index) in body of corpus callosum on FA (fractional anisotropy) skeleton (from dMRI data)	Body of corpus callosum	33875891	31355	0	0	European
IDP_dMRI_TBSS_OD_Cerebral_peduncle_L_PMID33875891	Brain dMRI	WM tract OD	Mean OD (orientation dispersion index) in cerebral peduncle (left) on FA (fractional anisotropy) skeleton (from dMRI data)	Cerebral peduncle	33875891	31355	0	0	European
IDP_dMRI_TBSS_OD_Cerebral_peduncle_R_PMID33875891	Brain dMRI	WM tract OD	Mean OD (orientation dispersion index) in cerebral peduncle (right) on FA (fractional anisotropy) skeleton (from dMRI data)	Cerebral peduncle	33875891	31355	0	0	European
IDP_dMRI_TBSS_OD_Cingulum_cingulate_gyrus_L_PMID33875891	Brain dMRI	WM tract OD	Mean OD (orientation dispersion index) in cingulum cingulate gyrus (left) on FA (fractional anisotropy) skeleton (from dMRI data)	Cingulum Cingulate gyrus	33875891	31355	0	0	European
IDP_dMRI_TBSS_OD_Cingulum_cingulate_gyrus_R_PMID33875891	Brain dMRI	WM tract OD	Mean OD (orientation dispersion index) in cingulum cingulate gyrus (right) on FA (fractional anisotropy) skeleton (from dMRI data)	Cingulum Cingulate gyrus	33875891	31355	0	0	European
IDP_dMRI_TBSS_OD_Cingulum_hippocampus_L_PMID33875891	Brain dMRI	WM tract OD	Mean OD (orientation dispersion index) in cingulum hippocampus (left) on FA (fractional anisotropy) skeleton (from dMRI data)	Cingulum Hippocampus	33875891	31355	0	0	European
IDP_dMRI_TBSS_OD_Cingulum_hippocampus_R_PMID33875891	Brain dMRI	WM tract OD	Mean OD (orientation dispersion index) in cingulum hippocampus (right) on FA (fractional anisotropy) skeleton (from dMRI data)	Cingulum Hippocampus	33875891	31355	0	0	European
IDP_dMRI_TBSS_OD_Corticospinal_tract_L_PMID33875891	Brain dMRI	WM tract OD	Mean OD (orientation dispersion index) in corticospinal tract (left) on FA (fractional anisotropy) skeleton (from dMRI data)	Corticospinal tract	33875891	31355	0	0	European
IDP_dMRI_TBSS_OD_Corticospinal_tract_R_PMID33875891	Brain dMRI	WM tract OD	Mean OD (orientation dispersion index) in corticospinal tract (right) on FA (fractional anisotropy) skeleton (from dMRI data)	Corticospinal tract	33875891	31355	0	0	European
IDP_dMRI_TBSS_OD_External_capsule_L_PMID33875891	Brain dMRI	WM tract OD	Mean OD (orientation dispersion index) in external capsule (left) on FA (fractional anisotropy) skeleton (from dMRI data)	External capsule	33875891	31355	0	0	European
IDP_dMRI_TBSS_OD_External_capsule_R_PMID33875891	Brain dMRI	WM tract OD	Mean OD (orientation dispersion index) in external capsule (right) on FA (fractional anisotropy) skeleton (from dMRI data)	External capsule	33875891	31355	0	0	European
IDP_dMRI_TBSS_OD_Fornix_cres_Stria_terminalis_L_PMID33875891	Brain dMRI	WM tract OD	Mean OD (orientation dispersion index) in fornix cres+stria terminalis (left) on FA (fractional anisotropy) skeleton (from dMRI data)	Fornix cres+stria terminalis	33875891	31355	0	0	European
IDP_dMRI_TBSS_OD_Fornix_cres_Stria_terminalis_R_PMID33875891	Brain dMRI	WM tract OD	Mean OD (orientation dispersion index) in fornix cres+stria terminalis (right) on FA (fractional anisotropy) skeleton (from dMRI data)	Fornix cres+stria terminalis	33875891	31355	0	0	European
IDP_dMRI_TBSS_OD_Fornix_PMID33875891	Brain dMRI	WM tract OD	Mean OD (orientation dispersion index) in fornix on FA (fractional anisotropy) skeleton (from dMRI data)	Fornix	33875891	31355	0	0	European
IDP_dMRI_TBSS_OD_Genu_of_corpus_callosum_PMID33875891	Brain dMRI	WM tract OD	Mean OD (orientation dispersion index) in genu of corpus callosum on FA (fractional anisotropy) skeleton (from dMRI data)	Genu of corpus callosum	33875891	31355	0	0	European
IDP_dMRI_TBSS_OD_Inferior_cerebellar_peduncle_L_PMID33875891	Brain dMRI	WM tract OD	Mean OD (orientation dispersion index) in inferior cerebellar peduncle (left) on FA (fractional anisotropy) skeleton (from dMRI data)	Inferior cerebellar peduncle	33875891	31355	0	0	European
IDP_dMRI_TBSS_OD_Inferior_cerebellar_peduncle_R_PMID33875891	Brain dMRI	WM tract OD	Mean OD (orientation dispersion index) in inferior cerebellar peduncle (right) on FA (fractional anisotropy) skeleton (from dMRI data)	Inferior cerebellar peduncle	33875891	31355	0	0	European
IDP_dMRI_TBSS_OD_Medial_lemniscus_L_PMID33875891	Brain dMRI	WM tract OD	Mean OD (orientation dispersion index) in medial lemniscus (left) on FA (fractional anisotropy) skeleton (from dMRI data)	Medial lemniscus	33875891	31355	0	0	European
IDP_dMRI_TBSS_OD_Medial_lemniscus_R_PMID33875891	Brain dMRI	WM tract OD	Mean OD (orientation dispersion index) in medial lemniscus (right) on FA (fractional anisotropy) skeleton (from dMRI data)	Medial lemniscus	33875891	31355	0	0	European
IDP_dMRI_TBSS_OD_Middle_cerebellar_peduncle_PMID33875891	Brain dMRI	WM tract OD	Mean OD (orientation dispersion index) in middle cerebellar peduncle on FA (fractional anisotropy) skeleton (from dMRI data)	Middle cerebellar peduncle	33875891	31355	0	0	European
IDP_dMRI_TBSS_OD_Pontine_crossing_tract_PMID33875891	Brain dMRI	WM tract OD	Mean OD (orientation dispersion index) in pontine crossing tract on FA (fractional anisotropy) skeleton (from dMRI data)	Pontine crossing tract	33875891	31355	0	0	European
IDP_dMRI_TBSS_OD_Posterior_corona_radiata_L_PMID33875891	Brain dMRI	WM tract OD	Mean OD (orientation dispersion index) in posterior corona radiata (left) on FA (fractional anisotropy) skeleton (from dMRI data)	Posterior corona radiata	33875891	31355	0	0	European
IDP_dMRI_TBSS_OD_Posterior_corona_radiata_R_PMID33875891	Brain dMRI	WM tract OD	Mean OD (orientation dispersion index) in posterior corona radiata (right) on FA (fractional anisotropy) skeleton (from dMRI data)	Posterior corona radiata	33875891	31355	0	0	European
IDP_dMRI_TBSS_OD_Posterior_limb_of_internal_capsule_L_PMID33875891	Brain dMRI	WM tract OD	Mean OD (orientation dispersion index) in posterior limb of internal capsule (left) on FA (fractional anisotropy) skeleton (from dMRI data)	Posterior limb of internal capsule	33875891	31355	0	0	European
IDP_dMRI_TBSS_OD_Posterior_limb_of_internal_capsule_R_PMID33875891	Brain dMRI	WM tract OD	Mean OD (orientation dispersion index) in posterior limb of internal capsule (right) on FA (fractional anisotropy) skeleton (from dMRI data)	Posterior limb of internal capsule	33875891	31355	0	0	European
IDP_dMRI_TBSS_OD_Posterior_thalamic_radiation_L_PMID33875891	Brain dMRI	WM tract OD	Mean OD (orientation dispersion index) in posterior thalamic radiation (left) on FA (fractional anisotropy) skeleton (from dMRI data)	Posterior thalamic radiation	33875891	31355	0	0	European
IDP_dMRI_TBSS_OD_Posterior_thalamic_radiation_R_PMID33875891	Brain dMRI	WM tract OD	Mean OD (orientation dispersion index) in posterior thalamic radiation (right) on FA (fractional anisotropy) skeleton (from dMRI data)	Posterior thalamic radiation	33875891	31355	0	0	European
IDP_dMRI_TBSS_OD_Retrolenticular_part_of_internal_capsule_L_PMID33875891	Brain dMRI	WM tract OD	Mean OD (orientation dispersion index) in retrolenticular part of internal capsule (left) on FA (fractional anisotropy) skeleton (from dMRI data)	Retrolenticular part of internal capsule	33875891	31355	0	0	European
IDP_dMRI_TBSS_OD_Retrolenticular_part_of_internal_capsule_R_PMID33875891	Brain dMRI	WM tract OD	Mean OD (orientation dispersion index) in retrolenticular part of internal capsule (right) on FA (fractional anisotropy) skeleton (from dMRI data)	Retrolenticular part of internal capsule	33875891	31355	0	0	European
IDP_dMRI_TBSS_OD_Sagittal_stratum_L_PMID33875891	Brain dMRI	WM tract OD	Mean OD (orientation dispersion index) in sagittal stratum (left) on FA (fractional anisotropy) skeleton (from dMRI data)	Sagittal stratum	33875891	31355	0	0	European
IDP_dMRI_TBSS_OD_Sagittal_stratum_R_PMID33875891	Brain dMRI	WM tract OD	Mean OD (orientation dispersion index) in sagittal stratum (right) on FA (fractional anisotropy) skeleton (from dMRI data)	Sagittal stratum	33875891	31355	0	0	European
IDP_dMRI_TBSS_OD_Splenium_of_corpus_callosum_PMID33875891	Brain dMRI	WM tract OD	Mean OD (orientation dispersion index) in splenium of corpus callosum on FA (fractional anisotropy) skeleton (from dMRI data)	Splenium of corpus callosum	33875891	31355	0	0	European
IDP_dMRI_TBSS_OD_Superior_cerebellar_peduncle_L_PMID33875891	Brain dMRI	WM tract OD	Mean OD (orientation dispersion index) in superior cerebellar peduncle (left) on FA (fractional anisotropy) skeleton (from dMRI data)	Superior cerebellar peduncle	33875891	31355	0	0	European
IDP_dMRI_TBSS_OD_Superior_cerebellar_peduncle_R_PMID33875891	Brain dMRI	WM tract OD	Mean OD (orientation dispersion index) in superior cerebellar peduncle (right) on FA (fractional anisotropy) skeleton (from dMRI data)	Superior cerebellar peduncle	33875891	31355	0	0	European
IDP_dMRI_TBSS_OD_Superior_corona_radiata_L_PMID33875891	Brain dMRI	WM tract OD	Mean OD (orientation dispersion index) in superior corona radiata (left) on FA (fractional anisotropy) skeleton (from dMRI data)	Superior corona radiata	33875891	31355	0	0	European
IDP_dMRI_TBSS_OD_Superior_corona_radiata_R_PMID33875891	Brain dMRI	WM tract OD	Mean OD (orientation dispersion index) in superior corona radiata (right) on FA (fractional anisotropy) skeleton (from dMRI data)	Superior corona radiata	33875891	31355	0	0	European
IDP_dMRI_TBSS_OD_Superior_fronto_occipital_fasciculus_L_PMID33875891	Brain dMRI	WM tract OD	Mean OD (orientation dispersion index) in superior fronto-occipital fasciculus (left) on FA (fractional anisotropy) skeleton (from dMRI data)	Superior fronto-occipital fasciculus	33875891	31355	0	0	European
IDP_dMRI_TBSS_OD_Superior_fronto_occipital_fasciculus_R_PMID33875891	Brain dMRI	WM tract OD	Mean OD (orientation dispersion index) in superior fronto-occipital fasciculus (right) on FA (fractional anisotropy) skeleton (from dMRI data)	Superior fronto-occipital fasciculus	33875891	31355	0	0	European
IDP_dMRI_TBSS_OD_Superior_longitudinal_fasciculus_L_PMID33875891	Brain dMRI	WM tract OD	Mean OD (orientation dispersion index) in superior longitudinal fasciculus (left) on FA (fractional anisotropy) skeleton (from dMRI data)	Superior longitudinal fasciculus	33875891	31355	0	0	European
IDP_dMRI_TBSS_OD_Superior_longitudinal_fasciculus_R_PMID33875891	Brain dMRI	WM tract OD	Mean OD (orientation dispersion index) in superior longitudinal fasciculus (right) on FA (fractional anisotropy) skeleton (from dMRI data)	Superior longitudinal fasciculus	33875891	31355	0	0	European
IDP_dMRI_TBSS_OD_Tapetum_L_PMID33875891	Brain dMRI	WM tract OD	Mean OD (orientation dispersion index) in tapetum (left) on FA (fractional anisotropy) skeleton (from dMRI data)	Tapetum	33875891	31355	0	0	European
IDP_dMRI_TBSS_OD_Tapetum_R_PMID33875891	Brain dMRI	WM tract OD	Mean OD (orientation dispersion index) in tapetum (right) on FA (fractional anisotropy) skeleton (from dMRI data)	Tapetum	33875891	31355	0	0	European
IDP_dMRI_TBSS_OD_Uncinate_fasciculus_L_PMID33875891	Brain dMRI	WM tract OD	Mean OD (orientation dispersion index) in uncinate fasciculus (left) on FA (fractional anisotropy) skeleton (from dMRI data)	Uncinate fasciculus	33875891	31355	0	0	European
IDP_dMRI_TBSS_OD_Uncinate_fasciculus_R_PMID33875891	Brain dMRI	WM tract OD	Mean OD (orientation dispersion index) in uncinate fasciculus (right) on FA (fractional anisotropy) skeleton (from dMRI data)	Uncinate fasciculus	33875891	31355	0	0	European
IDP_SWI_T2star_left_accumbens_PMID33875891	Brain SWI	Regional T2*	Median T2star in left accumbens (from SWI data)	Accumbens	33875891	30056	0	0	European
IDP_SWI_T2star_left_amygdala_PMID33875891	Brain SWI	Regional T2*	Median T2star in left amygdala (from SWI data)	Amygdala	33875891	30056	0	0	European
IDP_SWI_T2star_left_caudate_PMID33875891	Brain SWI	Regional T2*	Median T2star in left caudate (from SWI data)	Caudate	33875891	30056	0	0	European
IDP_SWI_T2star_left_hippocampus_PMID33875891	Brain SWI	Regional T2*	Median T2star in left hippocampus (from SWI data)	Hippocampus	33875891	30056	0	0	European
IDP_SWI_T2star_left_pallidum_PMID33875891	Brain SWI	Regional T2*	Median T2star in left pallidum (from SWI data)	Pallidum	33875891	30056	0	0	European
IDP_SWI_T2star_left_putamen_PMID33875891	Brain SWI	Regional T2*	Median T2star in left putamen (from SWI data)	Putamen	33875891	30056	0	0	European
IDP_SWI_T2star_left_thalamus_PMID33875891	Brain SWI	Regional T2*	Median T2star in left thalamus (from SWI data)	Thalamus	33875891	30056	0	0	European
IDP_SWI_T2star_right_accumbens_PMID33875891	Brain SWI	Regional T2*	Median T2star in right accumbens (from SWI data)	Accumbens	33875891	30056	0	0	European
IDP_SWI_T2star_right_amygdala_PMID33875891	Brain SWI	Regional T2*	Median T2star in right amygdala (from SWI data)	Amygdala	33875891	30056	0	0	European
IDP_SWI_T2star_right_caudate_PMID33875891	Brain SWI	Regional T2*	Median T2star in right caudate (from SWI data)	Caudate	33875891	30056	0	0	European
IDP_SWI_T2star_right_hippocampus_PMID33875891	Brain SWI	Regional T2*	Median T2star in right hippocampus (from SWI data)	Hippocampus	33875891	30056	0	0	European
IDP_SWI_T2star_right_pallidum_PMID33875891	Brain SWI	Regional T2*	Median T2star in right pallidum (from SWI data)	Pallidum	33875891	30056	0	0	European
IDP_SWI_T2star_right_putamen_PMID33875891	Brain SWI	Regional T2*	Median T2star in right putamen (from SWI data)	Putamen	33875891	30056	0	0	European
IDP_SWI_T2star_right_thalamus_PMID33875891	Brain SWI	Regional T2*	Median T2star in right thalamus (from SWI data)	Thalamus	33875891	30056	0	0	European
IDP_T2_FLAIR_BIANCA_WMH_volume_PMID33875891	Brain MRI	White matter hyperintensity volume	Total volume of white matter hyperintensities (from T1 and T2_FLAIR images)	White matter	33875891	32114	0	0	European
IDP_tfMRI_90th_percentile_BOLD_faces_PMID33875891	Brain tfMRI	tfMRI activation	90th percentile of the BOLD (blood-oxygen-level dependent) effect (in group-defined mask) for faces activation (in task fMRI data)		33875891	27663	0	0	European
IDP_tfMRI_90th_percentile_BOLD_faces_shapes_amygdala_PMID33875891	Brain tfMRI	tfMRI activation	90th percentile of the BOLD (blood-oxygen-level dependent) effect (in group-defined amygdala activation mask) for faces-shapes contrast (in task fMRI data)	Amygdala	33875891	27663	0	0	European
IDP_tfMRI_90th_percentile_BOLD_faces_shapes_PMID33875891	Brain tfMRI	tfMRI activation	90th percentile of the BOLD (blood-oxygen-level dependent) effect (in group-defined mask) for faces-shapes contrast (in task fMRI data)		33875891	27663	0	0	European
IDP_tfMRI_90th_percentile_BOLD_shapes_PMID33875891	Brain tfMRI	tfMRI activation	90th percentile of the BOLD (blood-oxygen-level dependent) effect (in group-defined mask) for shapes activation (in task fMRI data)		33875891	27663	0	0	European
IDP_tfMRI_90th_percentile_zstat_faces_PMID33875891	Brain tfMRI	tfMRI activation	90th percentile of the z-statistic (in group-defined mask) for faces activation (in task fMRI data)		33875891	27663	0	0	European
IDP_tfMRI_90th_percentile_zstat_faces_shapes_amygdala_PMID33875891	Brain tfMRI	tfMRI activation	90th percentile of the z-statistic (in group-defined amygdala activation mask) for faces-shapes contrast (in task fMRI data)	Amygdala	33875891	27663	0	0	European
IDP_tfMRI_90th_percentile_zstat_faces_shapes_PMID33875891	Brain tfMRI	tfMRI activation	90th percentile of the z-statistic (in group-defined mask) for faces-shapes contrast (in task fMRI data)		33875891	27663	0	0	European
IDP_tfMRI_90th_percentile_zstat_shapes_PMID33875891	Brain tfMRI	tfMRI activation	90th percentile of the z-statistic (in group-defined mask) for shapes activation (in task fMRI data)		33875891	27663	0	0	European
IDP_tfMRI_median_BOLD_faces_PMID33875891	Brain tfMRI	tfMRI activation	Median BOLD (blood-oxygen-level dependent) effect (in group-defined mask) for faces activation (in task fMRI data)		33875891	27663	0	0	European
IDP_tfMRI_median_BOLD_faces_shapes_amygdala_PMID33875891	Brain tfMRI	tfMRI activation	Median BOLD (blood-oxygen-level dependent) effect (in group-defined amygdala activation mask) for faces-shapes contrast (in task fMRI data)	Amygdala	33875891	27663	0	0	European
IDP_tfMRI_median_BOLD_faces_shapes_PMID33875891	Brain tfMRI	tfMRI activation	Median BOLD (blood-oxygen-level dependent) effect (in group-defined mask) for faces-shapes contrast (in task fMRI data)		33875891	27663	0	0	European
IDP_tfMRI_median_BOLD_shapes_PMID33875891	Brain tfMRI	tfMRI activation	Median BOLD (blood-oxygen-level dependent) effect (in group-defined mask) for shapes activation (in task fMRI data)		33875891	27663	0	0	European
IDP_tfMRI_median_zstat_faces_PMID33875891	Brain tfMRI	tfMRI activation	Median z-statistic (in group-defined mask) for faces activation (in task fMRI data)		33875891	27663	0	0	European
IDP_tfMRI_median_zstat_faces_shapes_amygdala_PMID33875891	Brain tfMRI	tfMRI activation	Median z-statistic (in group-defined amygdala activation mask) for faces-shapes contrast (in task fMRI data)	Amygdala	33875891	27663	0	0	European
IDP_tfMRI_median_zstat_faces_shapes_PMID33875891	Brain tfMRI	tfMRI activation	Median z-statistic (in group-defined mask) for faces-shapes contrast (in task fMRI data)		33875891	27663	0	0	European
IDP_tfMRI_median_zstat_shapes_PMID33875891	Brain tfMRI	tfMRI activation	Median z-statistic (in group-defined mask) for shapes activation (in task fMRI data)		33875891	27663	0	0	European
rfMRIamplitudes_ICA100node1__PMID33875891	Brain rfMRI	rfMRI node amplitude	ICA dimension 100		33875891	31688	0	0	European
rfMRIamplitudes_ICA100node10__PMID33875891	Brain rfMRI	rfMRI node amplitude	ICA dimension 100		33875891	31688	0	0	European
rfMRIamplitudes_ICA100node11__PMID33875891	Brain rfMRI	rfMRI node amplitude	ICA dimension 100		33875891	31688	0	0	European
rfMRIamplitudes_ICA100node12__PMID33875891	Brain rfMRI	rfMRI node amplitude	ICA dimension 100		33875891	31688	0	0	European
rfMRIamplitudes_ICA100node13__PMID33875891	Brain rfMRI	rfMRI node amplitude	ICA dimension 100		33875891	31688	0	0	European
rfMRIamplitudes_ICA100node14__PMID33875891	Brain rfMRI	rfMRI node amplitude	ICA dimension 100		33875891	31688	0	0	European
rfMRIamplitudes_ICA100node15__PMID33875891	Brain rfMRI	rfMRI node amplitude	ICA dimension 100		33875891	31688	0	0	European
rfMRIamplitudes_ICA100node16__PMID33875891	Brain rfMRI	rfMRI node amplitude	ICA dimension 100		33875891	31688	0	0	European
rfMRIamplitudes_ICA100node17__PMID33875891	Brain rfMRI	rfMRI node amplitude	ICA dimension 100		33875891	31688	0	0	European
rfMRIamplitudes_ICA100node18__PMID33875891	Brain rfMRI	rfMRI node amplitude	ICA dimension 100		33875891	31688	0	0	European
rfMRIamplitudes_ICA100node19__PMID33875891	Brain rfMRI	rfMRI node amplitude	ICA dimension 100		33875891	31688	0	0	European
rfMRIamplitudes_ICA100node2__PMID33875891	Brain rfMRI	rfMRI node amplitude	ICA dimension 100		33875891	31688	0	0	European
rfMRIamplitudes_ICA100node20__PMID33875891	Brain rfMRI	rfMRI node amplitude	ICA dimension 100		33875891	31688	0	0	European
rfMRIamplitudes_ICA100node21__PMID33875891	Brain rfMRI	rfMRI node amplitude	ICA dimension 100		33875891	31688	0	0	European
rfMRIamplitudes_ICA100node22__PMID33875891	Brain rfMRI	rfMRI node amplitude	ICA dimension 100		33875891	31688	0	0	European
rfMRIamplitudes_ICA100node23__PMID33875891	Brain rfMRI	rfMRI node amplitude	ICA dimension 100		33875891	31688	0	0	European
rfMRIamplitudes_ICA100node24__PMID33875891	Brain rfMRI	rfMRI node amplitude	ICA dimension 100		33875891	31688	0	0	European
rfMRIamplitudes_ICA100node25__PMID33875891	Brain rfMRI	rfMRI node amplitude	ICA dimension 100		33875891	31688	0	0	European
rfMRIamplitudes_ICA100node26__PMID33875891	Brain rfMRI	rfMRI node amplitude	ICA dimension 100		33875891	31688	0	0	European
rfMRIamplitudes_ICA100node27__PMID33875891	Brain rfMRI	rfMRI node amplitude	ICA dimension 100		33875891	31688	0	0	European
rfMRIamplitudes_ICA100node28__PMID33875891	Brain rfMRI	rfMRI node amplitude	ICA dimension 100		33875891	31688	0	0	European
rfMRIamplitudes_ICA100node29__PMID33875891	Brain rfMRI	rfMRI node amplitude	ICA dimension 100		33875891	31688	0	0	European
rfMRIamplitudes_ICA100node3__PMID33875891	Brain rfMRI	rfMRI node amplitude	ICA dimension 100		33875891	31688	0	0	European
rfMRIamplitudes_ICA100node30__PMID33875891	Brain rfMRI	rfMRI node amplitude	ICA dimension 100		33875891	31688	0	0	European
rfMRIamplitudes_ICA100node31__PMID33875891	Brain rfMRI	rfMRI node amplitude	ICA dimension 100		33875891	31688	0	0	European
rfMRIamplitudes_ICA100node32__PMID33875891	Brain rfMRI	rfMRI node amplitude	ICA dimension 100		33875891	31688	0	0	European
rfMRIamplitudes_ICA100node33__PMID33875891	Brain rfMRI	rfMRI node amplitude	ICA dimension 100		33875891	31688	0	0	European
rfMRIamplitudes_ICA100node34__PMID33875891	Brain rfMRI	rfMRI node amplitude	ICA dimension 100		33875891	31688	0	0	European
rfMRIamplitudes_ICA100node35__PMID33875891	Brain rfMRI	rfMRI node amplitude	ICA dimension 100		33875891	31688	0	0	European
rfMRIamplitudes_ICA100node36__PMID33875891	Brain rfMRI	rfMRI node amplitude	ICA dimension 100		33875891	31688	0	0	European
rfMRIamplitudes_ICA100node37__PMID33875891	Brain rfMRI	rfMRI node amplitude	ICA dimension 100		33875891	31688	0	0	European
rfMRIamplitudes_ICA100node38__PMID33875891	Brain rfMRI	rfMRI node amplitude	ICA dimension 100		33875891	31688	0	0	European
rfMRIamplitudes_ICA100node39__PMID33875891	Brain rfMRI	rfMRI node amplitude	ICA dimension 100		33875891	31688	0	0	European
rfMRIamplitudes_ICA100node4__PMID33875891	Brain rfMRI	rfMRI node amplitude	ICA dimension 100		33875891	31688	0	0	European
rfMRIamplitudes_ICA100node40__PMID33875891	Brain rfMRI	rfMRI node amplitude	ICA dimension 100		33875891	31688	0	0	European
rfMRIamplitudes_ICA100node41__PMID33875891	Brain rfMRI	rfMRI node amplitude	ICA dimension 100		33875891	31688	0	0	European
rfMRIamplitudes_ICA100node42__PMID33875891	Brain rfMRI	rfMRI node amplitude	ICA dimension 100		33875891	31688	0	0	European
rfMRIamplitudes_ICA100node43__PMID33875891	Brain rfMRI	rfMRI node amplitude	ICA dimension 100		33875891	31688	0	0	European
rfMRIamplitudes_ICA100node44__PMID33875891	Brain rfMRI	rfMRI node amplitude	ICA dimension 100		33875891	31688	0	0	European
rfMRIamplitudes_ICA100node45__PMID33875891	Brain rfMRI	rfMRI node amplitude	ICA dimension 100		33875891	31688	0	0	European
rfMRIamplitudes_ICA100node46__PMID33875891	Brain rfMRI	rfMRI node amplitude	ICA dimension 100		33875891	31688	0	0	European
rfMRIamplitudes_ICA100node47__PMID33875891	Brain rfMRI	rfMRI node amplitude	ICA dimension 100		33875891	31688	0	0	European
rfMRIamplitudes_ICA100node48__PMID33875891	Brain rfMRI	rfMRI node amplitude	ICA dimension 100		33875891	31688	0	0	European
rfMRIamplitudes_ICA100node49__PMID33875891	Brain rfMRI	rfMRI node amplitude	ICA dimension 100		33875891	31688	0	0	European
rfMRIamplitudes_ICA100node5__PMID33875891	Brain rfMRI	rfMRI node amplitude	ICA dimension 100		33875891	31688	0	0	European
rfMRIamplitudes_ICA100node50__PMID33875891	Brain rfMRI	rfMRI node amplitude	ICA dimension 100		33875891	31688	0	0	European
rfMRIamplitudes_ICA100node51__PMID33875891	Brain rfMRI	rfMRI node amplitude	ICA dimension 100		33875891	31688	0	0	European
rfMRIamplitudes_ICA100node52__PMID33875891	Brain rfMRI	rfMRI node amplitude	ICA dimension 100		33875891	31688	0	0	European
rfMRIamplitudes_ICA100node53__PMID33875891	Brain rfMRI	rfMRI node amplitude	ICA dimension 100		33875891	31688	0	0	European
rfMRIamplitudes_ICA100node54__PMID33875891	Brain rfMRI	rfMRI node amplitude	ICA dimension 100		33875891	31688	0	0	European
rfMRIamplitudes_ICA100node55__PMID33875891	Brain rfMRI	rfMRI node amplitude	ICA dimension 100		33875891	31688	0	0	European
rfMRIamplitudes_ICA100node6__PMID33875891	Brain rfMRI	rfMRI node amplitude	ICA dimension 100		33875891	31688	0	0	European
rfMRIamplitudes_ICA100node7__PMID33875891	Brain rfMRI	rfMRI node amplitude	ICA dimension 100		33875891	31688	0	0	European
rfMRIamplitudes_ICA100node8__PMID33875891	Brain rfMRI	rfMRI node amplitude	ICA dimension 100		33875891	31688	0	0	European
rfMRIamplitudes_ICA100node9__PMID33875891	Brain rfMRI	rfMRI node amplitude	ICA dimension 100		33875891	31688	0	0	European
rfMRIconnectivity_ICA100edge1__PMID33875891	Brain rfMRI	rfMRI connectivity	ICA dimension 100		33875891	31688	0	0	European
rfMRIconnectivity_ICA100edge10__PMID33875891	Brain rfMRI	rfMRI connectivity	ICA dimension 100		33875891	31688	0	0	European
rfMRIconnectivity_ICA100edge100__PMID33875891	Brain rfMRI	rfMRI connectivity	ICA dimension 100		33875891	31688	0	0	European
rfMRIconnectivity_ICA100edge1000__PMID33875891	Brain rfMRI	rfMRI connectivity	ICA dimension 100		33875891	31688	0	0	European
rfMRIconnectivity_ICA100edge1001__PMID33875891	Brain rfMRI	rfMRI connectivity	ICA dimension 100		33875891	31688	0	0	European
rfMRIconnectivity_ICA100edge1002__PMID33875891	Brain rfMRI	rfMRI connectivity	ICA dimension 100		33875891	31688	0	0	European
rfMRIconnectivity_ICA100edge1003__PMID33875891	Brain rfMRI	rfMRI connectivity	ICA dimension 100		33875891	31688	0	0	European
rfMRIconnectivity_ICA100edge1004__PMID33875891	Brain rfMRI	rfMRI connectivity	ICA dimension 100		33875891	31688	0	0	European
rfMRIconnectivity_ICA100edge1005__PMID33875891	Brain rfMRI	rfMRI connectivity	ICA dimension 100		33875891	31688	0	0	European
rfMRIconnectivity_ICA100edge1006__PMID33875891	Brain rfMRI	rfMRI connectivity	ICA dimension 100		33875891	31688	0	0	European
rfMRIconnectivity_ICA100edge1007__PMID33875891	Brain rfMRI	rfMRI connectivity	ICA dimension 100		33875891	31688	0	0	European
rfMRIconnectivity_ICA100edge1008__PMID33875891	Brain rfMRI	rfMRI connectivity	ICA dimension 100		33875891	31688	0	0	European
rfMRIconnectivity_ICA100edge1009__PMID33875891	Brain rfMRI	rfMRI connectivity	ICA dimension 100		33875891	31688	0	0	European
rfMRIconnectivity_ICA100edge101__PMID33875891	Brain rfMRI	rfMRI connectivity	ICA dimension 100		33875891	31688	0	0	European
rfMRIconnectivity_ICA100edge1010__PMID33875891	Brain rfMRI	rfMRI connectivity	ICA dimension 100		33875891	31688	0	0	European
rfMRIconnectivity_ICA100edge1011__PMID33875891	Brain rfMRI	rfMRI connectivity	ICA dimension 100		33875891	31688	0	0	European
rfMRIconnectivity_ICA100edge1012__PMID33875891	Brain rfMRI	rfMRI connectivity	ICA dimension 100		33875891	31688	0	0	European
rfMRIconnectivity_ICA100edge1013__PMID33875891	Brain rfMRI	rfMRI connectivity	ICA dimension 100		33875891	31688	0	0	European
rfMRIconnectivity_ICA100edge1014__PMID33875891	Brain rfMRI	rfMRI connectivity	ICA dimension 100		33875891	31688	0	0	European
rfMRIconnectivity_ICA100edge1015__PMID33875891	Brain rfMRI	rfMRI connectivity	ICA dimension 100		33875891	31688	0	0	European
rfMRIconnectivity_ICA100edge1016__PMID33875891	Brain rfMRI	rfMRI connectivity	ICA dimension 100		33875891	31688	0	0	European
rfMRIconnectivity_ICA100edge1017__PMID33875891	Brain rfMRI	rfMRI connectivity	ICA dimension 100		33875891	31688	0	0	European
rfMRIconnectivity_ICA100edge1018__PMID33875891	Brain rfMRI	rfMRI connectivity	ICA dimension 100		33875891	31688	0	0	European
rfMRIconnectivity_ICA100edge1019__PMID33875891	Brain rfMRI	rfMRI connectivity	ICA dimension 100		33875891	31688	0	0	European
rfMRIconnectivity_ICA100edge102__PMID33875891	Brain rfMRI	rfMRI connectivity	ICA dimension 100		33875891	31688	0	0	European
rfMRIconnectivity_ICA100edge1020__PMID33875891	Brain rfMRI	rfMRI connectivity	ICA dimension 100		33875891	31688	0	0	European
rfMRIconnectivity_ICA100edge1021__PMID33875891	Brain rfMRI	rfMRI connectivity	ICA dimension 100		33875891	31688	0	0	European
rfMRIconnectivity_ICA100edge1022__PMID33875891	Brain rfMRI	rfMRI connectivity	ICA dimension 100		33875891	31688	0	0	European
rfMRIconnectivity_ICA100edge1023__PMID33875891	Brain rfMRI	rfMRI connectivity	ICA dimension 100		33875891	31688	0	0	European
rfMRIconnectivity_ICA100edge1024__PMID33875891	Brain rfMRI	rfMRI connectivity	ICA dimension 100		33875891	31688	0	0	European
rfMRIconnectivity_ICA100edge1025__PMID33875891	Brain rfMRI	rfMRI connectivity	ICA dimension 100		33875891	31688	0	0	European
rfMRIconnectivity_ICA100edge1026__PMID33875891	Brain rfMRI	rfMRI connectivity	ICA dimension 100		33875891	31688	0	0	European
rfMRIconnectivity_ICA100edge1027__PMID33875891	Brain rfMRI	rfMRI connectivity	ICA dimension 100		33875891	31688	0	0	European
rfMRIconnectivity_ICA100edge1028__PMID33875891	Brain rfMRI	rfMRI connectivity	ICA dimension 100		33875891	31688	0	0	European
rfMRIconnectivity_ICA100edge1029__PMID33875891	Brain rfMRI	rfMRI connectivity	ICA dimension 100		33875891	31688	0	0	European
rfMRIconnectivity_ICA100edge103__PMID33875891	Brain rfMRI	rfMRI connectivity	ICA dimension 100		33875891	31688	0	0	European
rfMRIconnectivity_ICA100edge1030__PMID33875891	Brain rfMRI	rfMRI connectivity	ICA dimension 100		33875891	31688	0	0	European
rfMRIconnectivity_ICA100edge1031__PMID33875891	Brain rfMRI	rfMRI connectivity	ICA dimension 100		33875891	31688	0	0	European
rfMRIconnectivity_ICA100edge1032__PMID33875891	Brain rfMRI	rfMRI connectivity	ICA dimension 100		33875891	31688	0	0	European
rfMRIconnectivity_ICA100edge1033__PMID33875891	Brain rfMRI	rfMRI connectivity	ICA dimension 100		33875891	31688	0	0	European
rfMRIconnectivity_ICA100edge1034__PMID33875891	Brain rfMRI	rfMRI connectivity	ICA dimension 100		33875891	31688	0	0	European
rfMRIconnectivity_ICA100edge1035__PMID33875891	Brain rfMRI	rfMRI connectivity	ICA dimension 100		33875891	31688	0	0	European
rfMRIconnectivity_ICA100edge1036__PMID33875891	Brain rfMRI	rfMRI connectivity	ICA dimension 100		33875891	31688	0	0	European
rfMRIconnectivity_ICA100edge1037__PMID33875891	Brain rfMRI	rfMRI connectivity	ICA dimension 100		33875891	31688	0	0	European
rfMRIconnectivity_ICA100edge1038__PMID33875891	Brain rfMRI	rfMRI connectivity	ICA dimension 100		33875891	31688	0	0	European
rfMRIconnectivity_ICA100edge1039__PMID33875891	Brain rfMRI	rfMRI connectivity	ICA dimension 100		33875891	31688	0	0	European
rfMRIconnectivity_ICA100edge104__PMID33875891	Brain rfMRI	rfMRI connectivity	ICA dimension 100		33875891	31688	0	0	European
rfMRIconnectivity_ICA100edge1040__PMID33875891	Brain rfMRI	rfMRI connectivity	ICA dimension 100		33875891	31688	0	0	European
rfMRIconnectivity_ICA100edge1041__PMID33875891	Brain rfMRI	rfMRI connectivity	ICA dimension 100		33875891	31688	0	0	European
rfMRIconnectivity_ICA100edge1042__PMID33875891	Brain rfMRI	rfMRI connectivity	ICA dimension 100		33875891	31688	0	0	European
rfMRIconnectivity_ICA100edge1043__PMID33875891	Brain rfMRI	rfMRI connectivity	ICA dimension 100		33875891	31688	0	0	European
rfMRIconnectivity_ICA100edge1044__PMID33875891	Brain rfMRI	rfMRI connectivity	ICA dimension 100		33875891	31688	0	0	European
rfMRIconnectivity_ICA100edge1045__PMID33875891	Brain rfMRI	rfMRI connectivity	ICA dimension 100		33875891	31688	0	0	European
rfMRIconnectivity_ICA100edge1046__PMID33875891	Brain rfMRI	rfMRI connectivity	ICA dimension 100		33875891	31688	0	0	European
rfMRIconnectivity_ICA100edge1047__PMID33875891	Brain rfMRI	rfMRI connectivity	ICA dimension 100		33875891	31688	0	0	European
rfMRIconnectivity_ICA100edge1048__PMID33875891	Brain rfMRI	rfMRI connectivity	ICA dimension 100		33875891	31688	0	0	European
rfMRIconnectivity_ICA100edge1049__PMID33875891	Brain rfMRI	rfMRI connectivity	ICA dimension 100		33875891	31688	0	0	European
rfMRIconnectivity_ICA100edge105__PMID33875891	Brain rfMRI	rfMRI connectivity	ICA dimension 100		33875891	31688	0	0	European
rfMRIconnectivity_ICA100edge1050__PMID33875891	Brain rfMRI	rfMRI connectivity	ICA dimension 100		33875891	31688	0	0	European
rfMRIconnectivity_ICA100edge1051__PMID33875891	Brain rfMRI	rfMRI connectivity	ICA dimension 100		33875891	31688	0	0	European
rfMRIconnectivity_ICA100edge1052__PMID33875891	Brain rfMRI	rfMRI connectivity	ICA dimension 100		33875891	31688	0	0	European
rfMRIconnectivity_ICA100edge1053__PMID33875891	Brain rfMRI	rfMRI connectivity	ICA dimension 100		33875891	31688	0	0	European
rfMRIconnectivity_ICA100edge1054__PMID33875891	Brain rfMRI	rfMRI connectivity	ICA dimension 100		33875891	31688	0	0	European
rfMRIconnectivity_ICA100edge1055__PMID33875891	Brain rfMRI	rfMRI connectivity	ICA dimension 100		33875891	31688	0	0	European
rfMRIconnectivity_ICA100edge1056__PMID33875891	Brain rfMRI	rfMRI connectivity	ICA dimension 100		33875891	31688	0	0	European
rfMRIconnectivity_ICA100edge1057__PMID33875891	Brain rfMRI	rfMRI connectivity	ICA dimension 100		33875891	31688	0	0	European
rfMRIconnectivity_ICA100edge1058__PMID33875891	Brain rfMRI	rfMRI connectivity	ICA dimension 100		33875891	31688	0	0	European
rfMRIconnectivity_ICA100edge1059__PMID33875891	Brain rfMRI	rfMRI connectivity	ICA dimension 100		33875891	31688	0	0	European
rfMRIconnectivity_ICA100edge106__PMID33875891	Brain rfMRI	rfMRI connectivity	ICA dimension 100		33875891	31688	0	0	European
rfMRIconnectivity_ICA100edge1060__PMID33875891	Brain rfMRI	rfMRI connectivity	ICA dimension 100		33875891	31688	0	0	European
rfMRIconnectivity_ICA100edge1061__PMID33875891	Brain rfMRI	rfMRI connectivity	ICA dimension 100		33875891	31688	0	0	European
rfMRIconnectivity_ICA100edge1062__PMID33875891	Brain rfMRI	rfMRI connectivity	ICA dimension 100		33875891	31688	0	0	European
rfMRIconnectivity_ICA100edge1063__PMID33875891	Brain rfMRI	rfMRI connectivity	ICA dimension 100		33875891	31688	0	0	European
rfMRIconnectivity_ICA100edge1064__PMID33875891	Brain rfMRI	rfMRI connectivity	ICA dimension 100		33875891	31688	0	0	European
rfMRIconnectivity_ICA100edge1065__PMID33875891	Brain rfMRI	rfMRI connectivity	ICA dimension 100		33875891	31688	0	0	European
rfMRIconnectivity_ICA100edge1066__PMID33875891	Brain rfMRI	rfMRI connectivity	ICA dimension 100		33875891	31688	0	0	European
rfMRIconnectivity_ICA100edge1067__PMID33875891	Brain rfMRI	rfMRI connectivity	ICA dimension 100		33875891	31688	0	0	European
rfMRIconnectivity_ICA100edge1068__PMID33875891	Brain rfMRI	rfMRI connectivity	ICA dimension 100		33875891	31688	0	0	European
rfMRIconnectivity_ICA100edge1069__PMID33875891	Brain rfMRI	rfMRI connectivity	ICA dimension 100		33875891	31688	0	0	European
rfMRIconnectivity_ICA100edge107__PMID33875891	Brain rfMRI	rfMRI connectivity	ICA dimension 100		33875891	31688	0	0	European
rfMRIconnectivity_ICA100edge1070__PMID33875891	Brain rfMRI	rfMRI connectivity	ICA dimension 100		33875891	31688	0	0	European
rfMRIconnectivity_ICA100edge1071__PMID33875891	Brain rfMRI	rfMRI connectivity	ICA dimension 100		33875891	31688	0	0	European
rfMRIconnectivity_ICA100edge1072__PMID33875891	Brain rfMRI	rfMRI connectivity	ICA dimension 100		33875891	31688	0	0	European
rfMRIconnectivity_ICA100edge1073__PMID33875891	Brain rfMRI	rfMRI connectivity	ICA dimension 100		33875891	31688	0	0	European
rfMRIconnectivity_ICA100edge1074__PMID33875891	Brain rfMRI	rfMRI connectivity	ICA dimension 100		33875891	31688	0	0	European
rfMRIconnectivity_ICA100edge1075__PMID33875891	Brain rfMRI	rfMRI connectivity	ICA dimension 100		33875891	31688	0	0	European
rfMRIconnectivity_ICA100edge1076__PMID33875891	Brain rfMRI	rfMRI connectivity	ICA dimension 100		33875891	31688	0	0	European
rfMRIconnectivity_ICA100edge1077__PMID33875891	Brain rfMRI	rfMRI connectivity	ICA dimension 100		33875891	31688	0	0	European
rfMRIconnectivity_ICA100edge1078__PMID33875891	Brain rfMRI	rfMRI connectivity	ICA dimension 100		33875891	31688	0	0	European
rfMRIconnectivity_ICA100edge1079__PMID33875891	Brain rfMRI	rfMRI connectivity	ICA dimension 100		33875891	31688	0	0	European
rfMRIconnectivity_ICA100edge108__PMID33875891	Brain rfMRI	rfMRI connectivity	ICA dimension 100		33875891	31688	0	0	European
rfMRIconnectivity_ICA100edge1080__PMID33875891	Brain rfMRI	rfMRI connectivity	ICA dimension 100		33875891	31688	0	0	European
rfMRIconnectivity_ICA100edge1081__PMID33875891	Brain rfMRI	rfMRI connectivity	ICA dimension 100		33875891	31688	0	0	European
rfMRIconnectivity_ICA100edge1082__PMID33875891	Brain rfMRI	rfMRI connectivity	ICA dimension 100		33875891	31688	0	0	European
rfMRIconnectivity_ICA100edge1083__PMID33875891	Brain rfMRI	rfMRI connectivity	ICA dimension 100		33875891	31688	0	0	European
rfMRIconnectivity_ICA100edge1084__PMID33875891	Brain rfMRI	rfMRI connectivity	ICA dimension 100		33875891	31688	0	0	European
rfMRIconnectivity_ICA100edge1085__PMID33875891	Brain rfMRI	rfMRI connectivity	ICA dimension 100		33875891	31688	0	0	European
rfMRIconnectivity_ICA100edge1086__PMID33875891	Brain rfMRI	rfMRI connectivity	ICA dimension 100		33875891	31688	0	0	European
rfMRIconnectivity_ICA100edge1087__PMID33875891	Brain rfMRI	rfMRI connectivity	ICA dimension 100		33875891	31688	0	0	European
rfMRIconnectivity_ICA100edge1088__PMID33875891	Brain rfMRI	rfMRI connectivity	ICA dimension 100		33875891	31688	0	0	European
rfMRIconnectivity_ICA100edge1089__PMID33875891	Brain rfMRI	rfMRI connectivity	ICA dimension 100		33875891	31688	0	0	European
rfMRIconnectivity_ICA100edge109__PMID33875891	Brain rfMRI	rfMRI connectivity	ICA dimension 100		33875891	31688	0	0	European
rfMRIconnectivity_ICA100edge1090__PMID33875891	Brain rfMRI	rfMRI connectivity	ICA dimension 100		33875891	31688	0	0	European
rfMRIconnectivity_ICA100edge1091__PMID33875891	Brain rfMRI	rfMRI connectivity	ICA dimension 100		33875891	31688	0	0	European
rfMRIconnectivity_ICA100edge1092__PMID33875891	Brain rfMRI	rfMRI connectivity	ICA dimension 100		33875891	31688	0	0	European
rfMRIconnectivity_ICA100edge1093__PMID33875891	Brain rfMRI	rfMRI connectivity	ICA dimension 100		33875891	31688	0	0	European
rfMRIconnectivity_ICA100edge1094__PMID33875891	Brain rfMRI	rfMRI connectivity	ICA dimension 100		33875891	31688	0	0	European
rfMRIconnectivity_ICA100edge1095__PMID33875891	Brain rfMRI	rfMRI connectivity	ICA dimension 100		33875891	31688	0	0	European
rfMRIconnectivity_ICA100edge1096__PMID33875891	Brain rfMRI	rfMRI connectivity	ICA dimension 100		33875891	31688	0	0	European
rfMRIconnectivity_ICA100edge1097__PMID33875891	Brain rfMRI	rfMRI connectivity	ICA dimension 100		33875891	31688	0	0	European
rfMRIconnectivity_ICA100edge1098__PMID33875891	Brain rfMRI	rfMRI connectivity	ICA dimension 100		33875891	31688	0	0	European
rfMRIconnectivity_ICA100edge1099__PMID33875891	Brain rfMRI	rfMRI connectivity	ICA dimension 100		33875891	31688	0	0	European
rfMRIconnectivity_ICA100edge11__PMID33875891	Brain rfMRI	rfMRI connectivity	ICA dimension 100		33875891	31688	0	0	European
rfMRIconnectivity_ICA100edge110__PMID33875891	Brain rfMRI	rfMRI connectivity	ICA dimension 100		33875891	31688	0	0	European
rfMRIconnectivity_ICA100edge1100__PMID33875891	Brain rfMRI	rfMRI connectivity	ICA dimension 100		33875891	31688	0	0	European
rfMRIconnectivity_ICA100edge1101__PMID33875891	Brain rfMRI	rfMRI connectivity	ICA dimension 100		33875891	31688	0	0	European
rfMRIconnectivity_ICA100edge1102__PMID33875891	Brain rfMRI	rfMRI connectivity	ICA dimension 100		33875891	31688	0	0	European
rfMRIconnectivity_ICA100edge1103__PMID33875891	Brain rfMRI	rfMRI connectivity	ICA dimension 100		33875891	31688	0	0	European
rfMRIconnectivity_ICA100edge1104__PMID33875891	Brain rfMRI	rfMRI connectivity	ICA dimension 100		33875891	31688	0	0	European
rfMRIconnectivity_ICA100edge1105__PMID33875891	Brain rfMRI	rfMRI connectivity	ICA dimension 100		33875891	31688	0	0	European
rfMRIconnectivity_ICA100edge1106__PMID33875891	Brain rfMRI	rfMRI connectivity	ICA dimension 100		33875891	31688	0	0	European
rfMRIconnectivity_ICA100edge1107__PMID33875891	Brain rfMRI	rfMRI connectivity	ICA dimension 100		33875891	31688	0	0	European
rfMRIconnectivity_ICA100edge1108__PMID33875891	Brain rfMRI	rfMRI connectivity	ICA dimension 100		33875891	31688	0	0	European
rfMRIconnectivity_ICA100edge1109__PMID33875891	Brain rfMRI	rfMRI connectivity	ICA dimension 100		33875891	31688	0	0	European
rfMRIconnectivity_ICA100edge111__PMID33875891	Brain rfMRI	rfMRI connectivity	ICA dimension 100		33875891	31688	0	0	European
rfMRIconnectivity_ICA100edge1110__PMID33875891	Brain rfMRI	rfMRI connectivity	ICA dimension 100		33875891	31688	0	0	European
rfMRIconnectivity_ICA100edge1111__PMID33875891	Brain rfMRI	rfMRI connectivity	ICA dimension 100		33875891	31688	0	0	European
rfMRIconnectivity_ICA100edge1112__PMID33875891	Brain rfMRI	rfMRI connectivity	ICA dimension 100		33875891	31688	0	0	European
rfMRIconnectivity_ICA100edge1113__PMID33875891	Brain rfMRI	rfMRI connectivity	ICA dimension 100		33875891	31688	0	0	European
rfMRIconnectivity_ICA100edge1114__PMID33875891	Brain rfMRI	rfMRI connectivity	ICA dimension 100		33875891	31688	0	0	European
rfMRIconnectivity_ICA100edge1115__PMID33875891	Brain rfMRI	rfMRI connectivity	ICA dimension 100		33875891	31688	0	0	European
rfMRIconnectivity_ICA100edge1116__PMID33875891	Brain rfMRI	rfMRI connectivity	ICA dimension 100		33875891	31688	0	0	European
rfMRIconnectivity_ICA100edge1117__PMID33875891	Brain rfMRI	rfMRI connectivity	ICA dimension 100		33875891	31688	0	0	European
rfMRIconnectivity_ICA100edge1118__PMID33875891	Brain rfMRI	rfMRI connectivity	ICA dimension 100		33875891	31688	0	0	European
rfMRIconnectivity_ICA100edge1119__PMID33875891	Brain rfMRI	rfMRI connectivity	ICA dimension 100		33875891	31688	0	0	European
rfMRIconnectivity_ICA100edge112__PMID33875891	Brain rfMRI	rfMRI connectivity	ICA dimension 100		33875891	31688	0	0	European
rfMRIconnectivity_ICA100edge1120__PMID33875891	Brain rfMRI	rfMRI connectivity	ICA dimension 100		33875891	31688	0	0	European
rfMRIconnectivity_ICA100edge1121__PMID33875891	Brain rfMRI	rfMRI connectivity	ICA dimension 100		33875891	31688	0	0	European
rfMRIconnectivity_ICA100edge1122__PMID33875891	Brain rfMRI	rfMRI connectivity	ICA dimension 100		33875891	31688	0	0	European
rfMRIconnectivity_ICA100edge1123__PMID33875891	Brain rfMRI	rfMRI connectivity	ICA dimension 100		33875891	31688	0	0	European
rfMRIconnectivity_ICA100edge1124__PMID33875891	Brain rfMRI	rfMRI connectivity	ICA dimension 100		33875891	31688	0	0	European
rfMRIconnectivity_ICA100edge1125__PMID33875891	Brain rfMRI	rfMRI connectivity	ICA dimension 100		33875891	31688	0	0	European
rfMRIconnectivity_ICA100edge1126__PMID33875891	Brain rfMRI	rfMRI connectivity	ICA dimension 100		33875891	31688	0	0	European
rfMRIconnectivity_ICA100edge1127__PMID33875891	Brain rfMRI	rfMRI connectivity	ICA dimension 100		33875891	31688	0	0	European
rfMRIconnectivity_ICA100edge1128__PMID33875891	Brain rfMRI	rfMRI connectivity	ICA dimension 100		33875891	31688	0	0	European
rfMRIconnectivity_ICA100edge1129__PMID33875891	Brain rfMRI	rfMRI connectivity	ICA dimension 100		33875891	31688	0	0	European
rfMRIconnectivity_ICA100edge113__PMID33875891	Brain rfMRI	rfMRI connectivity	ICA dimension 100		33875891	31688	0	0	European
rfMRIconnectivity_ICA100edge1130__PMID33875891	Brain rfMRI	rfMRI connectivity	ICA dimension 100		33875891	31688	0	0	European
rfMRIconnectivity_ICA100edge1131__PMID33875891	Brain rfMRI	rfMRI connectivity	ICA dimension 100		33875891	31688	0	0	European
rfMRIconnectivity_ICA100edge1132__PMID33875891	Brain rfMRI	rfMRI connectivity	ICA dimension 100		33875891	31688	0	0	European
rfMRIconnectivity_ICA100edge1133__PMID33875891	Brain rfMRI	rfMRI connectivity	ICA dimension 100		33875891	31688	0	0	European
rfMRIconnectivity_ICA100edge1134__PMID33875891	Brain rfMRI	rfMRI connectivity	ICA dimension 100		33875891	31688	0	0	European
rfMRIconnectivity_ICA100edge1135__PMID33875891	Brain rfMRI	rfMRI connectivity	ICA dimension 100		33875891	31688	0	0	European
rfMRIconnectivity_ICA100edge1136__PMID33875891	Brain rfMRI	rfMRI connectivity	ICA dimension 100		33875891	31688	0	0	European
rfMRIconnectivity_ICA100edge1137__PMID33875891	Brain rfMRI	rfMRI connectivity	ICA dimension 100		33875891	31688	0	0	European
rfMRIconnectivity_ICA100edge1138__PMID33875891	Brain rfMRI	rfMRI connectivity	ICA dimension 100		33875891	31688	0	0	European
rfMRIconnectivity_ICA100edge1139__PMID33875891	Brain rfMRI	rfMRI connectivity	ICA dimension 100		33875891	31688	0	0	European
rfMRIconnectivity_ICA100edge114__PMID33875891	Brain rfMRI	rfMRI connectivity	ICA dimension 100		33875891	31688	0	0	European
rfMRIconnectivity_ICA100edge1140__PMID33875891	Brain rfMRI	rfMRI connectivity	ICA dimension 100		33875891	31688	0	0	European
rfMRIconnectivity_ICA100edge1141__PMID33875891	Brain rfMRI	rfMRI connectivity	ICA dimension 100		33875891	31688	0	0	European
rfMRIconnectivity_ICA100edge1142__PMID33875891	Brain rfMRI	rfMRI connectivity	ICA dimension 100		33875891	31688	0	0	European
rfMRIconnectivity_ICA100edge1143__PMID33875891	Brain rfMRI	rfMRI connectivity	ICA dimension 100		33875891	31688	0	0	European
rfMRIconnectivity_ICA100edge1144__PMID33875891	Brain rfMRI	rfMRI connectivity	ICA dimension 100		33875891	31688	0	0	European
rfMRIconnectivity_ICA100edge1145__PMID33875891	Brain rfMRI	rfMRI connectivity	ICA dimension 100		33875891	31688	0	0	European
rfMRIconnectivity_ICA100edge1146__PMID33875891	Brain rfMRI	rfMRI connectivity	ICA dimension 100		33875891	31688	0	0	European
rfMRIconnectivity_ICA100edge1147__PMID33875891	Brain rfMRI	rfMRI connectivity	ICA dimension 100		33875891	31688	0	0	European
rfMRIconnectivity_ICA100edge1148__PMID33875891	Brain rfMRI	rfMRI connectivity	ICA dimension 100		33875891	31688	0	0	European
rfMRIconnectivity_ICA100edge1149__PMID33875891	Brain rfMRI	rfMRI connectivity	ICA dimension 100		33875891	31688	0	0	European
rfMRIconnectivity_ICA100edge115__PMID33875891	Brain rfMRI	rfMRI connectivity	ICA dimension 100		33875891	31688	0	0	European
rfMRIconnectivity_ICA100edge1150__PMID33875891	Brain rfMRI	rfMRI connectivity	ICA dimension 100		33875891	31688	0	0	European
rfMRIconnectivity_ICA100edge1151__PMID33875891	Brain rfMRI	rfMRI connectivity	ICA dimension 100		33875891	31688	0	0	European
rfMRIconnectivity_ICA100edge1152__PMID33875891	Brain rfMRI	rfMRI connectivity	ICA dimension 100		33875891	31688	0	0	European
rfMRIconnectivity_ICA100edge1153__PMID33875891	Brain rfMRI	rfMRI connectivity	ICA dimension 100		33875891	31688	0	0	European
rfMRIconnectivity_ICA100edge1154__PMID33875891	Brain rfMRI	rfMRI connectivity	ICA dimension 100		33875891	31688	0	0	European
rfMRIconnectivity_ICA100edge1155__PMID33875891	Brain rfMRI	rfMRI connectivity	ICA dimension 100		33875891	31688	0	0	European
rfMRIconnectivity_ICA100edge1156__PMID33875891	Brain rfMRI	rfMRI connectivity	ICA dimension 100		33875891	31688	0	0	European
rfMRIconnectivity_ICA100edge1157__PMID33875891	Brain rfMRI	rfMRI connectivity	ICA dimension 100		33875891	31688	0	0	European
rfMRIconnectivity_ICA100edge1158__PMID33875891	Brain rfMRI	rfMRI connectivity	ICA dimension 100		33875891	31688	0	0	European
rfMRIconnectivity_ICA100edge1159__PMID33875891	Brain rfMRI	rfMRI connectivity	ICA dimension 100		33875891	31688	0	0	European
rfMRIconnectivity_ICA100edge116__PMID33875891	Brain rfMRI	rfMRI connectivity	ICA dimension 100		33875891	31688	0	0	European
rfMRIconnectivity_ICA100edge1160__PMID33875891	Brain rfMRI	rfMRI connectivity	ICA dimension 100		33875891	31688	0	0	European
rfMRIconnectivity_ICA100edge1161__PMID33875891	Brain rfMRI	rfMRI connectivity	ICA dimension 100		33875891	31688	0	0	European
rfMRIconnectivity_ICA100edge1162__PMID33875891	Brain rfMRI	rfMRI connectivity	ICA dimension 100		33875891	31688	0	0	European
rfMRIconnectivity_ICA100edge1163__PMID33875891	Brain rfMRI	rfMRI connectivity	ICA dimension 100		33875891	31688	0	0	European
rfMRIconnectivity_ICA100edge1164__PMID33875891	Brain rfMRI	rfMRI connectivity	ICA dimension 100		33875891	31688	0	0	European
rfMRIconnectivity_ICA100edge1165__PMID33875891	Brain rfMRI	rfMRI connectivity	ICA dimension 100		33875891	31688	0	0	European
rfMRIconnectivity_ICA100edge1166__PMID33875891	Brain rfMRI	rfMRI connectivity	ICA dimension 100		33875891	31688	0	0	European
rfMRIconnectivity_ICA100edge1167__PMID33875891	Brain rfMRI	rfMRI connectivity	ICA dimension 100		33875891	31688	0	0	European
rfMRIconnectivity_ICA100edge1168__PMID33875891	Brain rfMRI	rfMRI connectivity	ICA dimension 100		33875891	31688	0	0	European
rfMRIconnectivity_ICA100edge1169__PMID33875891	Brain rfMRI	rfMRI connectivity	ICA dimension 100		33875891	31688	0	0	European
rfMRIconnectivity_ICA100edge117__PMID33875891	Brain rfMRI	rfMRI connectivity	ICA dimension 100		33875891	31688	0	0	European
rfMRIconnectivity_ICA100edge1170__PMID33875891	Brain rfMRI	rfMRI connectivity	ICA dimension 100		33875891	31688	0	0	European
rfMRIconnectivity_ICA100edge1171__PMID33875891	Brain rfMRI	rfMRI connectivity	ICA dimension 100		33875891	31688	0	0	European
rfMRIconnectivity_ICA100edge1172__PMID33875891	Brain rfMRI	rfMRI connectivity	ICA dimension 100		33875891	31688	0	0	European
rfMRIconnectivity_ICA100edge1173__PMID33875891	Brain rfMRI	rfMRI connectivity	ICA dimension 100		33875891	31688	0	0	European
rfMRIconnectivity_ICA100edge1174__PMID33875891	Brain rfMRI	rfMRI connectivity	ICA dimension 100		33875891	31688	0	0	European
rfMRIconnectivity_ICA100edge1175__PMID33875891	Brain rfMRI	rfMRI connectivity	ICA dimension 100		33875891	31688	0	0	European
rfMRIconnectivity_ICA100edge1176__PMID33875891	Brain rfMRI	rfMRI connectivity	ICA dimension 100		33875891	31688	0	0	European
rfMRIconnectivity_ICA100edge1177__PMID33875891	Brain rfMRI	rfMRI connectivity	ICA dimension 100		33875891	31688	0	0	European
rfMRIconnectivity_ICA100edge1178__PMID33875891	Brain rfMRI	rfMRI connectivity	ICA dimension 100		33875891	31688	0	0	European
rfMRIconnectivity_ICA100edge1179__PMID33875891	Brain rfMRI	rfMRI connectivity	ICA dimension 100		33875891	31688	0	0	European
rfMRIconnectivity_ICA100edge118__PMID33875891	Brain rfMRI	rfMRI connectivity	ICA dimension 100		33875891	31688	0	0	European
rfMRIconnectivity_ICA100edge1180__PMID33875891	Brain rfMRI	rfMRI connectivity	ICA dimension 100		33875891	31688	0	0	European
rfMRIconnectivity_ICA100edge1181__PMID33875891	Brain rfMRI	rfMRI connectivity	ICA dimension 100		33875891	31688	0	0	European
rfMRIconnectivity_ICA100edge1182__PMID33875891	Brain rfMRI	rfMRI connectivity	ICA dimension 100		33875891	31688	0	0	European
rfMRIconnectivity_ICA100edge1183__PMID33875891	Brain rfMRI	rfMRI connectivity	ICA dimension 100		33875891	31688	0	0	European
rfMRIconnectivity_ICA100edge1184__PMID33875891	Brain rfMRI	rfMRI connectivity	ICA dimension 100		33875891	31688	0	0	European
rfMRIconnectivity_ICA100edge1185__PMID33875891	Brain rfMRI	rfMRI connectivity	ICA dimension 100		33875891	31688	0	0	European
rfMRIconnectivity_ICA100edge1186__PMID33875891	Brain rfMRI	rfMRI connectivity	ICA dimension 100		33875891	31688	0	0	European
rfMRIconnectivity_ICA100edge1187__PMID33875891	Brain rfMRI	rfMRI connectivity	ICA dimension 100		33875891	31688	0	0	European
rfMRIconnectivity_ICA100edge1188__PMID33875891	Brain rfMRI	rfMRI connectivity	ICA dimension 100		33875891	31688	0	0	European
rfMRIconnectivity_ICA100edge1189__PMID33875891	Brain rfMRI	rfMRI connectivity	ICA dimension 100		33875891	31688	0	0	European
rfMRIconnectivity_ICA100edge119__PMID33875891	Brain rfMRI	rfMRI connectivity	ICA dimension 100		33875891	31688	0	0	European
rfMRIconnectivity_ICA100edge1190__PMID33875891	Brain rfMRI	rfMRI connectivity	ICA dimension 100		33875891	31688	0	0	European
rfMRIconnectivity_ICA100edge1191__PMID33875891	Brain rfMRI	rfMRI connectivity	ICA dimension 100		33875891	31688	0	0	European
rfMRIconnectivity_ICA100edge1192__PMID33875891	Brain rfMRI	rfMRI connectivity	ICA dimension 100		33875891	31688	0	0	European
rfMRIconnectivity_ICA100edge1193__PMID33875891	Brain rfMRI	rfMRI connectivity	ICA dimension 100		33875891	31688	0	0	European
rfMRIconnectivity_ICA100edge1194__PMID33875891	Brain rfMRI	rfMRI connectivity	ICA dimension 100		33875891	31688	0	0	European
rfMRIconnectivity_ICA100edge1195__PMID33875891	Brain rfMRI	rfMRI connectivity	ICA dimension 100		33875891	31688	0	0	European
rfMRIconnectivity_ICA100edge1196__PMID33875891	Brain rfMRI	rfMRI connectivity	ICA dimension 100		33875891	31688	0	0	European
rfMRIconnectivity_ICA100edge1197__PMID33875891	Brain rfMRI	rfMRI connectivity	ICA dimension 100		33875891	31688	0	0	European
rfMRIconnectivity_ICA100edge1198__PMID33875891	Brain rfMRI	rfMRI connectivity	ICA dimension 100		33875891	31688	0	0	European
rfMRIconnectivity_ICA100edge1199__PMID33875891	Brain rfMRI	rfMRI connectivity	ICA dimension 100		33875891	31688	0	0	European
rfMRIconnectivity_ICA100edge12__PMID33875891	Brain rfMRI	rfMRI connectivity	ICA dimension 100		33875891	31688	0	0	European
rfMRIconnectivity_ICA100edge120__PMID33875891	Brain rfMRI	rfMRI connectivity	ICA dimension 100		33875891	31688	0	0	European
rfMRIconnectivity_ICA100edge1200__PMID33875891	Brain rfMRI	rfMRI connectivity	ICA dimension 100		33875891	31688	0	0	European
rfMRIconnectivity_ICA100edge1201__PMID33875891	Brain rfMRI	rfMRI connectivity	ICA dimension 100		33875891	31688	0	0	European
rfMRIconnectivity_ICA100edge1202__PMID33875891	Brain rfMRI	rfMRI connectivity	ICA dimension 100		33875891	31688	0	0	European
rfMRIconnectivity_ICA100edge1203__PMID33875891	Brain rfMRI	rfMRI connectivity	ICA dimension 100		33875891	31688	0	0	European
rfMRIconnectivity_ICA100edge1204__PMID33875891	Brain rfMRI	rfMRI connectivity	ICA dimension 100		33875891	31688	0	0	European
rfMRIconnectivity_ICA100edge1205__PMID33875891	Brain rfMRI	rfMRI connectivity	ICA dimension 100		33875891	31688	0	0	European
rfMRIconnectivity_ICA100edge1206__PMID33875891	Brain rfMRI	rfMRI connectivity	ICA dimension 100		33875891	31688	0	0	European
rfMRIconnectivity_ICA100edge1207__PMID33875891	Brain rfMRI	rfMRI connectivity	ICA dimension 100		33875891	31688	0	0	European
rfMRIconnectivity_ICA100edge1208__PMID33875891	Brain rfMRI	rfMRI connectivity	ICA dimension 100		33875891	31688	0	0	European
rfMRIconnectivity_ICA100edge1209__PMID33875891	Brain rfMRI	rfMRI connectivity	ICA dimension 100		33875891	31688	0	0	European
rfMRIconnectivity_ICA100edge121__PMID33875891	Brain rfMRI	rfMRI connectivity	ICA dimension 100		33875891	31688	0	0	European
rfMRIconnectivity_ICA100edge1210__PMID33875891	Brain rfMRI	rfMRI connectivity	ICA dimension 100		33875891	31688	0	0	European
rfMRIconnectivity_ICA100edge1211__PMID33875891	Brain rfMRI	rfMRI connectivity	ICA dimension 100		33875891	31688	0	0	European
rfMRIconnectivity_ICA100edge1212__PMID33875891	Brain rfMRI	rfMRI connectivity	ICA dimension 100		33875891	31688	0	0	European
rfMRIconnectivity_ICA100edge1213__PMID33875891	Brain rfMRI	rfMRI connectivity	ICA dimension 100		33875891	31688	0	0	European
rfMRIconnectivity_ICA100edge1214__PMID33875891	Brain rfMRI	rfMRI connectivity	ICA dimension 100		33875891	31688	0	0	European
rfMRIconnectivity_ICA100edge1215__PMID33875891	Brain rfMRI	rfMRI connectivity	ICA dimension 100		33875891	31688	0	0	European
rfMRIconnectivity_ICA100edge1216__PMID33875891	Brain rfMRI	rfMRI connectivity	ICA dimension 100		33875891	31688	0	0	European
rfMRIconnectivity_ICA100edge1217__PMID33875891	Brain rfMRI	rfMRI connectivity	ICA dimension 100		33875891	31688	0	0	European
rfMRIconnectivity_ICA100edge1218__PMID33875891	Brain rfMRI	rfMRI connectivity	ICA dimension 100		33875891	31688	0	0	European
rfMRIconnectivity_ICA100edge1219__PMID33875891	Brain rfMRI	rfMRI connectivity	ICA dimension 100		33875891	31688	0	0	European
rfMRIconnectivity_ICA100edge122__PMID33875891	Brain rfMRI	rfMRI connectivity	ICA dimension 100		33875891	31688	0	0	European
rfMRIconnectivity_ICA100edge1220__PMID33875891	Brain rfMRI	rfMRI connectivity	ICA dimension 100		33875891	31688	0	0	European
rfMRIconnectivity_ICA100edge1221__PMID33875891	Brain rfMRI	rfMRI connectivity	ICA dimension 100		33875891	31688	0	0	European
rfMRIconnectivity_ICA100edge1222__PMID33875891	Brain rfMRI	rfMRI connectivity	ICA dimension 100		33875891	31688	0	0	European
rfMRIconnectivity_ICA100edge1223__PMID33875891	Brain rfMRI	rfMRI connectivity	ICA dimension 100		33875891	31688	0	0	European
rfMRIconnectivity_ICA100edge1224__PMID33875891	Brain rfMRI	rfMRI connectivity	ICA dimension 100		33875891	31688	0	0	European
rfMRIconnectivity_ICA100edge1225__PMID33875891	Brain rfMRI	rfMRI connectivity	ICA dimension 100		33875891	31688	0	0	European
rfMRIconnectivity_ICA100edge1226__PMID33875891	Brain rfMRI	rfMRI connectivity	ICA dimension 100		33875891	31688	0	0	European
rfMRIconnectivity_ICA100edge1227__PMID33875891	Brain rfMRI	rfMRI connectivity	ICA dimension 100		33875891	31688	0	0	European
rfMRIconnectivity_ICA100edge1228__PMID33875891	Brain rfMRI	rfMRI connectivity	ICA dimension 100		33875891	31688	0	0	European
rfMRIconnectivity_ICA100edge1229__PMID33875891	Brain rfMRI	rfMRI connectivity	ICA dimension 100		33875891	31688	0	0	European
rfMRIconnectivity_ICA100edge123__PMID33875891	Brain rfMRI	rfMRI connectivity	ICA dimension 100		33875891	31688	0	0	European
rfMRIconnectivity_ICA100edge1230__PMID33875891	Brain rfMRI	rfMRI connectivity	ICA dimension 100		33875891	31688	0	0	European
rfMRIconnectivity_ICA100edge1231__PMID33875891	Brain rfMRI	rfMRI connectivity	ICA dimension 100		33875891	31688	0	0	European
rfMRIconnectivity_ICA100edge1232__PMID33875891	Brain rfMRI	rfMRI connectivity	ICA dimension 100		33875891	31688	0	0	European
rfMRIconnectivity_ICA100edge1233__PMID33875891	Brain rfMRI	rfMRI connectivity	ICA dimension 100		33875891	31688	0	0	European
rfMRIconnectivity_ICA100edge1234__PMID33875891	Brain rfMRI	rfMRI connectivity	ICA dimension 100		33875891	31688	0	0	European
rfMRIconnectivity_ICA100edge1235__PMID33875891	Brain rfMRI	rfMRI connectivity	ICA dimension 100		33875891	31688	0	0	European
rfMRIconnectivity_ICA100edge1236__PMID33875891	Brain rfMRI	rfMRI connectivity	ICA dimension 100		33875891	31688	0	0	European
rfMRIconnectivity_ICA100edge1237__PMID33875891	Brain rfMRI	rfMRI connectivity	ICA dimension 100		33875891	31688	0	0	European
rfMRIconnectivity_ICA100edge1238__PMID33875891	Brain rfMRI	rfMRI connectivity	ICA dimension 100		33875891	31688	0	0	European
rfMRIconnectivity_ICA100edge1239__PMID33875891	Brain rfMRI	rfMRI connectivity	ICA dimension 100		33875891	31688	0	0	European
rfMRIconnectivity_ICA100edge124__PMID33875891	Brain rfMRI	rfMRI connectivity	ICA dimension 100		33875891	31688	0	0	European
rfMRIconnectivity_ICA100edge1240__PMID33875891	Brain rfMRI	rfMRI connectivity	ICA dimension 100		33875891	31688	0	0	European
rfMRIconnectivity_ICA100edge1241__PMID33875891	Brain rfMRI	rfMRI connectivity	ICA dimension 100		33875891	31688	0	0	European
rfMRIconnectivity_ICA100edge1242__PMID33875891	Brain rfMRI	rfMRI connectivity	ICA dimension 100		33875891	31688	0	0	European
rfMRIconnectivity_ICA100edge1243__PMID33875891	Brain rfMRI	rfMRI connectivity	ICA dimension 100		33875891	31688	0	0	European
rfMRIconnectivity_ICA100edge1244__PMID33875891	Brain rfMRI	rfMRI connectivity	ICA dimension 100		33875891	31688	0	0	European
rfMRIconnectivity_ICA100edge1245__PMID33875891	Brain rfMRI	rfMRI connectivity	ICA dimension 100		33875891	31688	0	0	European
rfMRIconnectivity_ICA100edge1246__PMID33875891	Brain rfMRI	rfMRI connectivity	ICA dimension 100		33875891	31688	0	0	European
rfMRIconnectivity_ICA100edge1247__PMID33875891	Brain rfMRI	rfMRI connectivity	ICA dimension 100		33875891	31688	0	0	European
rfMRIconnectivity_ICA100edge1248__PMID33875891	Brain rfMRI	rfMRI connectivity	ICA dimension 100		33875891	31688	0	0	European
rfMRIconnectivity_ICA100edge1249__PMID33875891	Brain rfMRI	rfMRI connectivity	ICA dimension 100		33875891	31688	0	0	European
rfMRIconnectivity_ICA100edge125__PMID33875891	Brain rfMRI	rfMRI connectivity	ICA dimension 100		33875891	31688	0	0	European
rfMRIconnectivity_ICA100edge1250__PMID33875891	Brain rfMRI	rfMRI connectivity	ICA dimension 100		33875891	31688	0	0	European
rfMRIconnectivity_ICA100edge1251__PMID33875891	Brain rfMRI	rfMRI connectivity	ICA dimension 100		33875891	31688	0	0	European
rfMRIconnectivity_ICA100edge1252__PMID33875891	Brain rfMRI	rfMRI connectivity	ICA dimension 100		33875891	31688	0	0	European
rfMRIconnectivity_ICA100edge1253__PMID33875891	Brain rfMRI	rfMRI connectivity	ICA dimension 100		33875891	31688	0	0	European
rfMRIconnectivity_ICA100edge1254__PMID33875891	Brain rfMRI	rfMRI connectivity	ICA dimension 100		33875891	31688	0	0	European
rfMRIconnectivity_ICA100edge1255__PMID33875891	Brain rfMRI	rfMRI connectivity	ICA dimension 100		33875891	31688	0	0	European
rfMRIconnectivity_ICA100edge1256__PMID33875891	Brain rfMRI	rfMRI connectivity	ICA dimension 100		33875891	31688	0	0	European
rfMRIconnectivity_ICA100edge1257__PMID33875891	Brain rfMRI	rfMRI connectivity	ICA dimension 100		33875891	31688	0	0	European
rfMRIconnectivity_ICA100edge1258__PMID33875891	Brain rfMRI	rfMRI connectivity	ICA dimension 100		33875891	31688	0	0	European
rfMRIconnectivity_ICA100edge1259__PMID33875891	Brain rfMRI	rfMRI connectivity	ICA dimension 100		33875891	31688	0	0	European
rfMRIconnectivity_ICA100edge126__PMID33875891	Brain rfMRI	rfMRI connectivity	ICA dimension 100		33875891	31688	0	0	European
rfMRIconnectivity_ICA100edge1260__PMID33875891	Brain rfMRI	rfMRI connectivity	ICA dimension 100		33875891	31688	0	0	European
rfMRIconnectivity_ICA100edge1261__PMID33875891	Brain rfMRI	rfMRI connectivity	ICA dimension 100		33875891	31688	0	0	European
rfMRIconnectivity_ICA100edge1262__PMID33875891	Brain rfMRI	rfMRI connectivity	ICA dimension 100		33875891	31688	0	0	European
rfMRIconnectivity_ICA100edge1263__PMID33875891	Brain rfMRI	rfMRI connectivity	ICA dimension 100		33875891	31688	0	0	European
rfMRIconnectivity_ICA100edge1264__PMID33875891	Brain rfMRI	rfMRI connectivity	ICA dimension 100		33875891	31688	0	0	European
rfMRIconnectivity_ICA100edge1265__PMID33875891	Brain rfMRI	rfMRI connectivity	ICA dimension 100		33875891	31688	0	0	European
rfMRIconnectivity_ICA100edge1266__PMID33875891	Brain rfMRI	rfMRI connectivity	ICA dimension 100		33875891	31688	0	0	European
rfMRIconnectivity_ICA100edge1267__PMID33875891	Brain rfMRI	rfMRI connectivity	ICA dimension 100		33875891	31688	0	0	European
rfMRIconnectivity_ICA100edge1268__PMID33875891	Brain rfMRI	rfMRI connectivity	ICA dimension 100		33875891	31688	0	0	European
rfMRIconnectivity_ICA100edge1269__PMID33875891	Brain rfMRI	rfMRI connectivity	ICA dimension 100		33875891	31688	0	0	European
rfMRIconnectivity_ICA100edge127__PMID33875891	Brain rfMRI	rfMRI connectivity	ICA dimension 100		33875891	31688	0	0	European
rfMRIconnectivity_ICA100edge1270__PMID33875891	Brain rfMRI	rfMRI connectivity	ICA dimension 100		33875891	31688	0	0	European
rfMRIconnectivity_ICA100edge1271__PMID33875891	Brain rfMRI	rfMRI connectivity	ICA dimension 100		33875891	31688	0	0	European
rfMRIconnectivity_ICA100edge1272__PMID33875891	Brain rfMRI	rfMRI connectivity	ICA dimension 100		33875891	31688	0	0	European
rfMRIconnectivity_ICA100edge1273__PMID33875891	Brain rfMRI	rfMRI connectivity	ICA dimension 100		33875891	31688	0	0	European
rfMRIconnectivity_ICA100edge1274__PMID33875891	Brain rfMRI	rfMRI connectivity	ICA dimension 100		33875891	31688	0	0	European
rfMRIconnectivity_ICA100edge1275__PMID33875891	Brain rfMRI	rfMRI connectivity	ICA dimension 100		33875891	31688	0	0	European
rfMRIconnectivity_ICA100edge1276__PMID33875891	Brain rfMRI	rfMRI connectivity	ICA dimension 100		33875891	31688	0	0	European
rfMRIconnectivity_ICA100edge1277__PMID33875891	Brain rfMRI	rfMRI connectivity	ICA dimension 100		33875891	31688	0	0	European
rfMRIconnectivity_ICA100edge1278__PMID33875891	Brain rfMRI	rfMRI connectivity	ICA dimension 100		33875891	31688	0	0	European
rfMRIconnectivity_ICA100edge1279__PMID33875891	Brain rfMRI	rfMRI connectivity	ICA dimension 100		33875891	31688	0	0	European
rfMRIconnectivity_ICA100edge128__PMID33875891	Brain rfMRI	rfMRI connectivity	ICA dimension 100		33875891	31688	0	0	European
rfMRIconnectivity_ICA100edge1280__PMID33875891	Brain rfMRI	rfMRI connectivity	ICA dimension 100		33875891	31688	0	0	European
rfMRIconnectivity_ICA100edge1281__PMID33875891	Brain rfMRI	rfMRI connectivity	ICA dimension 100		33875891	31688	0	0	European
rfMRIconnectivity_ICA100edge1282__PMID33875891	Brain rfMRI	rfMRI connectivity	ICA dimension 100		33875891	31688	0	0	European
rfMRIconnectivity_ICA100edge1283__PMID33875891	Brain rfMRI	rfMRI connectivity	ICA dimension 100		33875891	31688	0	0	European
rfMRIconnectivity_ICA100edge1284__PMID33875891	Brain rfMRI	rfMRI connectivity	ICA dimension 100		33875891	31688	0	0	European
rfMRIconnectivity_ICA100edge1285__PMID33875891	Brain rfMRI	rfMRI connectivity	ICA dimension 100		33875891	31688	0	0	European
rfMRIconnectivity_ICA100edge1286__PMID33875891	Brain rfMRI	rfMRI connectivity	ICA dimension 100		33875891	31688	0	0	European
rfMRIconnectivity_ICA100edge1287__PMID33875891	Brain rfMRI	rfMRI connectivity	ICA dimension 100		33875891	31688	0	0	European
rfMRIconnectivity_ICA100edge1288__PMID33875891	Brain rfMRI	rfMRI connectivity	ICA dimension 100		33875891	31688	0	0	European
rfMRIconnectivity_ICA100edge1289__PMID33875891	Brain rfMRI	rfMRI connectivity	ICA dimension 100		33875891	31688	0	0	European
rfMRIconnectivity_ICA100edge129__PMID33875891	Brain rfMRI	rfMRI connectivity	ICA dimension 100		33875891	31688	0	0	European
rfMRIconnectivity_ICA100edge1290__PMID33875891	Brain rfMRI	rfMRI connectivity	ICA dimension 100		33875891	31688	0	0	European
rfMRIconnectivity_ICA100edge1291__PMID33875891	Brain rfMRI	rfMRI connectivity	ICA dimension 100		33875891	31688	0	0	European
rfMRIconnectivity_ICA100edge1292__PMID33875891	Brain rfMRI	rfMRI connectivity	ICA dimension 100		33875891	31688	0	0	European
rfMRIconnectivity_ICA100edge1293__PMID33875891	Brain rfMRI	rfMRI connectivity	ICA dimension 100		33875891	31688	0	0	European
rfMRIconnectivity_ICA100edge1294__PMID33875891	Brain rfMRI	rfMRI connectivity	ICA dimension 100		33875891	31688	0	0	European
rfMRIconnectivity_ICA100edge1295__PMID33875891	Brain rfMRI	rfMRI connectivity	ICA dimension 100		33875891	31688	0	0	European
rfMRIconnectivity_ICA100edge1296__PMID33875891	Brain rfMRI	rfMRI connectivity	ICA dimension 100		33875891	31688	0	0	European
rfMRIconnectivity_ICA100edge1297__PMID33875891	Brain rfMRI	rfMRI connectivity	ICA dimension 100		33875891	31688	0	0	European
rfMRIconnectivity_ICA100edge1298__PMID33875891	Brain rfMRI	rfMRI connectivity	ICA dimension 100		33875891	31688	0	0	European
rfMRIconnectivity_ICA100edge1299__PMID33875891	Brain rfMRI	rfMRI connectivity	ICA dimension 100		33875891	31688	0	0	European
rfMRIconnectivity_ICA100edge13__PMID33875891	Brain rfMRI	rfMRI connectivity	ICA dimension 100		33875891	31688	0	0	European
rfMRIconnectivity_ICA100edge130__PMID33875891	Brain rfMRI	rfMRI connectivity	ICA dimension 100		33875891	31688	0	0	European
rfMRIconnectivity_ICA100edge1300__PMID33875891	Brain rfMRI	rfMRI connectivity	ICA dimension 100		33875891	31688	0	0	European
rfMRIconnectivity_ICA100edge1301__PMID33875891	Brain rfMRI	rfMRI connectivity	ICA dimension 100		33875891	31688	0	0	European
rfMRIconnectivity_ICA100edge1302__PMID33875891	Brain rfMRI	rfMRI connectivity	ICA dimension 100		33875891	31688	0	0	European
rfMRIconnectivity_ICA100edge1303__PMID33875891	Brain rfMRI	rfMRI connectivity	ICA dimension 100		33875891	31688	0	0	European
rfMRIconnectivity_ICA100edge1304__PMID33875891	Brain rfMRI	rfMRI connectivity	ICA dimension 100		33875891	31688	0	0	European
rfMRIconnectivity_ICA100edge1305__PMID33875891	Brain rfMRI	rfMRI connectivity	ICA dimension 100		33875891	31688	0	0	European
rfMRIconnectivity_ICA100edge1306__PMID33875891	Brain rfMRI	rfMRI connectivity	ICA dimension 100		33875891	31688	0	0	European
rfMRIconnectivity_ICA100edge1307__PMID33875891	Brain rfMRI	rfMRI connectivity	ICA dimension 100		33875891	31688	0	0	European
rfMRIconnectivity_ICA100edge1308__PMID33875891	Brain rfMRI	rfMRI connectivity	ICA dimension 100		33875891	31688	0	0	European
rfMRIconnectivity_ICA100edge1309__PMID33875891	Brain rfMRI	rfMRI connectivity	ICA dimension 100		33875891	31688	0	0	European
rfMRIconnectivity_ICA100edge131__PMID33875891	Brain rfMRI	rfMRI connectivity	ICA dimension 100		33875891	31688	0	0	European
rfMRIconnectivity_ICA100edge1310__PMID33875891	Brain rfMRI	rfMRI connectivity	ICA dimension 100		33875891	31688	0	0	European
rfMRIconnectivity_ICA100edge1311__PMID33875891	Brain rfMRI	rfMRI connectivity	ICA dimension 100		33875891	31688	0	0	European
rfMRIconnectivity_ICA100edge1312__PMID33875891	Brain rfMRI	rfMRI connectivity	ICA dimension 100		33875891	31688	0	0	European
rfMRIconnectivity_ICA100edge1313__PMID33875891	Brain rfMRI	rfMRI connectivity	ICA dimension 100		33875891	31688	0	0	European
rfMRIconnectivity_ICA100edge1314__PMID33875891	Brain rfMRI	rfMRI connectivity	ICA dimension 100		33875891	31688	0	0	European
rfMRIconnectivity_ICA100edge1315__PMID33875891	Brain rfMRI	rfMRI connectivity	ICA dimension 100		33875891	31688	0	0	European
rfMRIconnectivity_ICA100edge1316__PMID33875891	Brain rfMRI	rfMRI connectivity	ICA dimension 100		33875891	31688	0	0	European
rfMRIconnectivity_ICA100edge1317__PMID33875891	Brain rfMRI	rfMRI connectivity	ICA dimension 100		33875891	31688	0	0	European
rfMRIconnectivity_ICA100edge1318__PMID33875891	Brain rfMRI	rfMRI connectivity	ICA dimension 100		33875891	31688	0	0	European
rfMRIconnectivity_ICA100edge1319__PMID33875891	Brain rfMRI	rfMRI connectivity	ICA dimension 100		33875891	31688	0	0	European
rfMRIconnectivity_ICA100edge132__PMID33875891	Brain rfMRI	rfMRI connectivity	ICA dimension 100		33875891	31688	0	0	European
rfMRIconnectivity_ICA100edge1320__PMID33875891	Brain rfMRI	rfMRI connectivity	ICA dimension 100		33875891	31688	0	0	European
rfMRIconnectivity_ICA100edge1321__PMID33875891	Brain rfMRI	rfMRI connectivity	ICA dimension 100		33875891	31688	0	0	European
rfMRIconnectivity_ICA100edge1322__PMID33875891	Brain rfMRI	rfMRI connectivity	ICA dimension 100		33875891	31688	0	0	European
rfMRIconnectivity_ICA100edge1323__PMID33875891	Brain rfMRI	rfMRI connectivity	ICA dimension 100		33875891	31688	0	0	European
rfMRIconnectivity_ICA100edge1324__PMID33875891	Brain rfMRI	rfMRI connectivity	ICA dimension 100		33875891	31688	0	0	European
rfMRIconnectivity_ICA100edge1325__PMID33875891	Brain rfMRI	rfMRI connectivity	ICA dimension 100		33875891	31688	0	0	European
rfMRIconnectivity_ICA100edge1326__PMID33875891	Brain rfMRI	rfMRI connectivity	ICA dimension 100		33875891	31688	0	0	European
rfMRIconnectivity_ICA100edge1327__PMID33875891	Brain rfMRI	rfMRI connectivity	ICA dimension 100		33875891	31688	0	0	European
rfMRIconnectivity_ICA100edge1328__PMID33875891	Brain rfMRI	rfMRI connectivity	ICA dimension 100		33875891	31688	0	0	European
rfMRIconnectivity_ICA100edge1329__PMID33875891	Brain rfMRI	rfMRI connectivity	ICA dimension 100		33875891	31688	0	0	European
rfMRIconnectivity_ICA100edge133__PMID33875891	Brain rfMRI	rfMRI connectivity	ICA dimension 100		33875891	31688	0	0	European
rfMRIconnectivity_ICA100edge1330__PMID33875891	Brain rfMRI	rfMRI connectivity	ICA dimension 100		33875891	31688	0	0	European
rfMRIconnectivity_ICA100edge1331__PMID33875891	Brain rfMRI	rfMRI connectivity	ICA dimension 100		33875891	31688	0	0	European
rfMRIconnectivity_ICA100edge1332__PMID33875891	Brain rfMRI	rfMRI connectivity	ICA dimension 100		33875891	31688	0	0	European
rfMRIconnectivity_ICA100edge1333__PMID33875891	Brain rfMRI	rfMRI connectivity	ICA dimension 100		33875891	31688	0	0	European
rfMRIconnectivity_ICA100edge1334__PMID33875891	Brain rfMRI	rfMRI connectivity	ICA dimension 100		33875891	31688	0	0	European
rfMRIconnectivity_ICA100edge1335__PMID33875891	Brain rfMRI	rfMRI connectivity	ICA dimension 100		33875891	31688	0	0	European
rfMRIconnectivity_ICA100edge1336__PMID33875891	Brain rfMRI	rfMRI connectivity	ICA dimension 100		33875891	31688	0	0	European
rfMRIconnectivity_ICA100edge1337__PMID33875891	Brain rfMRI	rfMRI connectivity	ICA dimension 100		33875891	31688	0	0	European
rfMRIconnectivity_ICA100edge1338__PMID33875891	Brain rfMRI	rfMRI connectivity	ICA dimension 100		33875891	31688	0	0	European
rfMRIconnectivity_ICA100edge1339__PMID33875891	Brain rfMRI	rfMRI connectivity	ICA dimension 100		33875891	31688	0	0	European
rfMRIconnectivity_ICA100edge134__PMID33875891	Brain rfMRI	rfMRI connectivity	ICA dimension 100		33875891	31688	0	0	European
rfMRIconnectivity_ICA100edge1340__PMID33875891	Brain rfMRI	rfMRI connectivity	ICA dimension 100		33875891	31688	0	0	European
rfMRIconnectivity_ICA100edge1341__PMID33875891	Brain rfMRI	rfMRI connectivity	ICA dimension 100		33875891	31688	0	0	European
rfMRIconnectivity_ICA100edge1342__PMID33875891	Brain rfMRI	rfMRI connectivity	ICA dimension 100		33875891	31688	0	0	European
rfMRIconnectivity_ICA100edge1343__PMID33875891	Brain rfMRI	rfMRI connectivity	ICA dimension 100		33875891	31688	0	0	European
rfMRIconnectivity_ICA100edge1344__PMID33875891	Brain rfMRI	rfMRI connectivity	ICA dimension 100		33875891	31688	0	0	European
rfMRIconnectivity_ICA100edge1345__PMID33875891	Brain rfMRI	rfMRI connectivity	ICA dimension 100		33875891	31688	0	0	European
rfMRIconnectivity_ICA100edge1346__PMID33875891	Brain rfMRI	rfMRI connectivity	ICA dimension 100		33875891	31688	0	0	European
rfMRIconnectivity_ICA100edge1347__PMID33875891	Brain rfMRI	rfMRI connectivity	ICA dimension 100		33875891	31688	0	0	European
rfMRIconnectivity_ICA100edge1348__PMID33875891	Brain rfMRI	rfMRI connectivity	ICA dimension 100		33875891	31688	0	0	European
rfMRIconnectivity_ICA100edge1349__PMID33875891	Brain rfMRI	rfMRI connectivity	ICA dimension 100		33875891	31688	0	0	European
rfMRIconnectivity_ICA100edge135__PMID33875891	Brain rfMRI	rfMRI connectivity	ICA dimension 100		33875891	31688	0	0	European
rfMRIconnectivity_ICA100edge1350__PMID33875891	Brain rfMRI	rfMRI connectivity	ICA dimension 100		33875891	31688	0	0	European
rfMRIconnectivity_ICA100edge1351__PMID33875891	Brain rfMRI	rfMRI connectivity	ICA dimension 100		33875891	31688	0	0	European
rfMRIconnectivity_ICA100edge1352__PMID33875891	Brain rfMRI	rfMRI connectivity	ICA dimension 100		33875891	31688	0	0	European
rfMRIconnectivity_ICA100edge1353__PMID33875891	Brain rfMRI	rfMRI connectivity	ICA dimension 100		33875891	31688	0	0	European
rfMRIconnectivity_ICA100edge1354__PMID33875891	Brain rfMRI	rfMRI connectivity	ICA dimension 100		33875891	31688	0	0	European
rfMRIconnectivity_ICA100edge1355__PMID33875891	Brain rfMRI	rfMRI connectivity	ICA dimension 100		33875891	31688	0	0	European
rfMRIconnectivity_ICA100edge1356__PMID33875891	Brain rfMRI	rfMRI connectivity	ICA dimension 100		33875891	31688	0	0	European
rfMRIconnectivity_ICA100edge1357__PMID33875891	Brain rfMRI	rfMRI connectivity	ICA dimension 100		33875891	31688	0	0	European
rfMRIconnectivity_ICA100edge1358__PMID33875891	Brain rfMRI	rfMRI connectivity	ICA dimension 100		33875891	31688	0	0	European
rfMRIconnectivity_ICA100edge1359__PMID33875891	Brain rfMRI	rfMRI connectivity	ICA dimension 100		33875891	31688	0	0	European
rfMRIconnectivity_ICA100edge136__PMID33875891	Brain rfMRI	rfMRI connectivity	ICA dimension 100		33875891	31688	0	0	European
rfMRIconnectivity_ICA100edge1360__PMID33875891	Brain rfMRI	rfMRI connectivity	ICA dimension 100		33875891	31688	0	0	European
rfMRIconnectivity_ICA100edge1361__PMID33875891	Brain rfMRI	rfMRI connectivity	ICA dimension 100		33875891	31688	0	0	European
rfMRIconnectivity_ICA100edge1362__PMID33875891	Brain rfMRI	rfMRI connectivity	ICA dimension 100		33875891	31688	0	0	European
rfMRIconnectivity_ICA100edge1363__PMID33875891	Brain rfMRI	rfMRI connectivity	ICA dimension 100		33875891	31688	0	0	European
rfMRIconnectivity_ICA100edge1364__PMID33875891	Brain rfMRI	rfMRI connectivity	ICA dimension 100		33875891	31688	0	0	European
rfMRIconnectivity_ICA100edge1365__PMID33875891	Brain rfMRI	rfMRI connectivity	ICA dimension 100		33875891	31688	0	0	European
rfMRIconnectivity_ICA100edge1366__PMID33875891	Brain rfMRI	rfMRI connectivity	ICA dimension 100		33875891	31688	0	0	European
rfMRIconnectivity_ICA100edge1367__PMID33875891	Brain rfMRI	rfMRI connectivity	ICA dimension 100		33875891	31688	0	0	European
rfMRIconnectivity_ICA100edge1368__PMID33875891	Brain rfMRI	rfMRI connectivity	ICA dimension 100		33875891	31688	0	0	European
rfMRIconnectivity_ICA100edge1369__PMID33875891	Brain rfMRI	rfMRI connectivity	ICA dimension 100		33875891	31688	0	0	European
rfMRIconnectivity_ICA100edge137__PMID33875891	Brain rfMRI	rfMRI connectivity	ICA dimension 100		33875891	31688	0	0	European
rfMRIconnectivity_ICA100edge1370__PMID33875891	Brain rfMRI	rfMRI connectivity	ICA dimension 100		33875891	31688	0	0	European
rfMRIconnectivity_ICA100edge1371__PMID33875891	Brain rfMRI	rfMRI connectivity	ICA dimension 100		33875891	31688	0	0	European
rfMRIconnectivity_ICA100edge1372__PMID33875891	Brain rfMRI	rfMRI connectivity	ICA dimension 100		33875891	31688	0	0	European
rfMRIconnectivity_ICA100edge1373__PMID33875891	Brain rfMRI	rfMRI connectivity	ICA dimension 100		33875891	31688	0	0	European
rfMRIconnectivity_ICA100edge1374__PMID33875891	Brain rfMRI	rfMRI connectivity	ICA dimension 100		33875891	31688	0	0	European
rfMRIconnectivity_ICA100edge1375__PMID33875891	Brain rfMRI	rfMRI connectivity	ICA dimension 100		33875891	31688	0	0	European
rfMRIconnectivity_ICA100edge1376__PMID33875891	Brain rfMRI	rfMRI connectivity	ICA dimension 100		33875891	31688	0	0	European
rfMRIconnectivity_ICA100edge1377__PMID33875891	Brain rfMRI	rfMRI connectivity	ICA dimension 100		33875891	31688	0	0	European
rfMRIconnectivity_ICA100edge1378__PMID33875891	Brain rfMRI	rfMRI connectivity	ICA dimension 100		33875891	31688	0	0	European
rfMRIconnectivity_ICA100edge1379__PMID33875891	Brain rfMRI	rfMRI connectivity	ICA dimension 100		33875891	31688	0	0	European
rfMRIconnectivity_ICA100edge138__PMID33875891	Brain rfMRI	rfMRI connectivity	ICA dimension 100		33875891	31688	0	0	European
rfMRIconnectivity_ICA100edge1380__PMID33875891	Brain rfMRI	rfMRI connectivity	ICA dimension 100		33875891	31688	0	0	European
rfMRIconnectivity_ICA100edge1381__PMID33875891	Brain rfMRI	rfMRI connectivity	ICA dimension 100		33875891	31688	0	0	European
rfMRIconnectivity_ICA100edge1382__PMID33875891	Brain rfMRI	rfMRI connectivity	ICA dimension 100		33875891	31688	0	0	European
rfMRIconnectivity_ICA100edge1383__PMID33875891	Brain rfMRI	rfMRI connectivity	ICA dimension 100		33875891	31688	0	0	European
rfMRIconnectivity_ICA100edge1384__PMID33875891	Brain rfMRI	rfMRI connectivity	ICA dimension 100		33875891	31688	0	0	European
rfMRIconnectivity_ICA100edge1385__PMID33875891	Brain rfMRI	rfMRI connectivity	ICA dimension 100		33875891	31688	0	0	European
rfMRIconnectivity_ICA100edge1386__PMID33875891	Brain rfMRI	rfMRI connectivity	ICA dimension 100		33875891	31688	0	0	European
rfMRIconnectivity_ICA100edge1387__PMID33875891	Brain rfMRI	rfMRI connectivity	ICA dimension 100		33875891	31688	0	0	European
rfMRIconnectivity_ICA100edge1388__PMID33875891	Brain rfMRI	rfMRI connectivity	ICA dimension 100		33875891	31688	0	0	European
rfMRIconnectivity_ICA100edge1389__PMID33875891	Brain rfMRI	rfMRI connectivity	ICA dimension 100		33875891	31688	0	0	European
rfMRIconnectivity_ICA100edge139__PMID33875891	Brain rfMRI	rfMRI connectivity	ICA dimension 100		33875891	31688	0	0	European
rfMRIconnectivity_ICA100edge1390__PMID33875891	Brain rfMRI	rfMRI connectivity	ICA dimension 100		33875891	31688	0	0	European
rfMRIconnectivity_ICA100edge1391__PMID33875891	Brain rfMRI	rfMRI connectivity	ICA dimension 100		33875891	31688	0	0	European
rfMRIconnectivity_ICA100edge1392__PMID33875891	Brain rfMRI	rfMRI connectivity	ICA dimension 100		33875891	31688	0	0	European
rfMRIconnectivity_ICA100edge1393__PMID33875891	Brain rfMRI	rfMRI connectivity	ICA dimension 100		33875891	31688	0	0	European
rfMRIconnectivity_ICA100edge1394__PMID33875891	Brain rfMRI	rfMRI connectivity	ICA dimension 100		33875891	31688	0	0	European
rfMRIconnectivity_ICA100edge1395__PMID33875891	Brain rfMRI	rfMRI connectivity	ICA dimension 100		33875891	31688	0	0	European
rfMRIconnectivity_ICA100edge1396__PMID33875891	Brain rfMRI	rfMRI connectivity	ICA dimension 100		33875891	31688	0	0	European
rfMRIconnectivity_ICA100edge1397__PMID33875891	Brain rfMRI	rfMRI connectivity	ICA dimension 100		33875891	31688	0	0	European
rfMRIconnectivity_ICA100edge1398__PMID33875891	Brain rfMRI	rfMRI connectivity	ICA dimension 100		33875891	31688	0	0	European
rfMRIconnectivity_ICA100edge1399__PMID33875891	Brain rfMRI	rfMRI connectivity	ICA dimension 100		33875891	31688	0	0	European
rfMRIconnectivity_ICA100edge14__PMID33875891	Brain rfMRI	rfMRI connectivity	ICA dimension 100		33875891	31688	0	0	European
rfMRIconnectivity_ICA100edge140__PMID33875891	Brain rfMRI	rfMRI connectivity	ICA dimension 100		33875891	31688	0	0	European
rfMRIconnectivity_ICA100edge1400__PMID33875891	Brain rfMRI	rfMRI connectivity	ICA dimension 100		33875891	31688	0	0	European
rfMRIconnectivity_ICA100edge1401__PMID33875891	Brain rfMRI	rfMRI connectivity	ICA dimension 100		33875891	31688	0	0	European
rfMRIconnectivity_ICA100edge1402__PMID33875891	Brain rfMRI	rfMRI connectivity	ICA dimension 100		33875891	31688	0	0	European
rfMRIconnectivity_ICA100edge1403__PMID33875891	Brain rfMRI	rfMRI connectivity	ICA dimension 100		33875891	31688	0	0	European
rfMRIconnectivity_ICA100edge1404__PMID33875891	Brain rfMRI	rfMRI connectivity	ICA dimension 100		33875891	31688	0	0	European
rfMRIconnectivity_ICA100edge1405__PMID33875891	Brain rfMRI	rfMRI connectivity	ICA dimension 100		33875891	31688	0	0	European
rfMRIconnectivity_ICA100edge1406__PMID33875891	Brain rfMRI	rfMRI connectivity	ICA dimension 100		33875891	31688	0	0	European
rfMRIconnectivity_ICA100edge1407__PMID33875891	Brain rfMRI	rfMRI connectivity	ICA dimension 100		33875891	31688	0	0	European
rfMRIconnectivity_ICA100edge1408__PMID33875891	Brain rfMRI	rfMRI connectivity	ICA dimension 100		33875891	31688	0	0	European
rfMRIconnectivity_ICA100edge1409__PMID33875891	Brain rfMRI	rfMRI connectivity	ICA dimension 100		33875891	31688	0	0	European
rfMRIconnectivity_ICA100edge141__PMID33875891	Brain rfMRI	rfMRI connectivity	ICA dimension 100		33875891	31688	0	0	European
rfMRIconnectivity_ICA100edge1410__PMID33875891	Brain rfMRI	rfMRI connectivity	ICA dimension 100		33875891	31688	0	0	European
rfMRIconnectivity_ICA100edge1411__PMID33875891	Brain rfMRI	rfMRI connectivity	ICA dimension 100		33875891	31688	0	0	European
rfMRIconnectivity_ICA100edge1412__PMID33875891	Brain rfMRI	rfMRI connectivity	ICA dimension 100		33875891	31688	0	0	European
rfMRIconnectivity_ICA100edge1413__PMID33875891	Brain rfMRI	rfMRI connectivity	ICA dimension 100		33875891	31688	0	0	European
rfMRIconnectivity_ICA100edge1414__PMID33875891	Brain rfMRI	rfMRI connectivity	ICA dimension 100		33875891	31688	0	0	European
rfMRIconnectivity_ICA100edge1415__PMID33875891	Brain rfMRI	rfMRI connectivity	ICA dimension 100		33875891	31688	0	0	European
rfMRIconnectivity_ICA100edge1416__PMID33875891	Brain rfMRI	rfMRI connectivity	ICA dimension 100		33875891	31688	0	0	European
rfMRIconnectivity_ICA100edge1417__PMID33875891	Brain rfMRI	rfMRI connectivity	ICA dimension 100		33875891	31688	0	0	European
rfMRIconnectivity_ICA100edge1418__PMID33875891	Brain rfMRI	rfMRI connectivity	ICA dimension 100		33875891	31688	0	0	European
rfMRIconnectivity_ICA100edge1419__PMID33875891	Brain rfMRI	rfMRI connectivity	ICA dimension 100		33875891	31688	0	0	European
rfMRIconnectivity_ICA100edge142__PMID33875891	Brain rfMRI	rfMRI connectivity	ICA dimension 100		33875891	31688	0	0	European
rfMRIconnectivity_ICA100edge1420__PMID33875891	Brain rfMRI	rfMRI connectivity	ICA dimension 100		33875891	31688	0	0	European
rfMRIconnectivity_ICA100edge1421__PMID33875891	Brain rfMRI	rfMRI connectivity	ICA dimension 100		33875891	31688	0	0	European
rfMRIconnectivity_ICA100edge1422__PMID33875891	Brain rfMRI	rfMRI connectivity	ICA dimension 100		33875891	31688	0	0	European
rfMRIconnectivity_ICA100edge1423__PMID33875891	Brain rfMRI	rfMRI connectivity	ICA dimension 100		33875891	31688	0	0	European
rfMRIconnectivity_ICA100edge1424__PMID33875891	Brain rfMRI	rfMRI connectivity	ICA dimension 100		33875891	31688	0	0	European
rfMRIconnectivity_ICA100edge1425__PMID33875891	Brain rfMRI	rfMRI connectivity	ICA dimension 100		33875891	31688	0	0	European
rfMRIconnectivity_ICA100edge1426__PMID33875891	Brain rfMRI	rfMRI connectivity	ICA dimension 100		33875891	31688	0	0	European
rfMRIconnectivity_ICA100edge1427__PMID33875891	Brain rfMRI	rfMRI connectivity	ICA dimension 100		33875891	31688	0	0	European
rfMRIconnectivity_ICA100edge1428__PMID33875891	Brain rfMRI	rfMRI connectivity	ICA dimension 100		33875891	31688	0	0	European
rfMRIconnectivity_ICA100edge1429__PMID33875891	Brain rfMRI	rfMRI connectivity	ICA dimension 100		33875891	31688	0	0	European
rfMRIconnectivity_ICA100edge143__PMID33875891	Brain rfMRI	rfMRI connectivity	ICA dimension 100		33875891	31688	0	0	European
rfMRIconnectivity_ICA100edge1430__PMID33875891	Brain rfMRI	rfMRI connectivity	ICA dimension 100		33875891	31688	0	0	European
rfMRIconnectivity_ICA100edge1431__PMID33875891	Brain rfMRI	rfMRI connectivity	ICA dimension 100		33875891	31688	0	0	European
rfMRIconnectivity_ICA100edge1432__PMID33875891	Brain rfMRI	rfMRI connectivity	ICA dimension 100		33875891	31688	0	0	European
rfMRIconnectivity_ICA100edge1433__PMID33875891	Brain rfMRI	rfMRI connectivity	ICA dimension 100		33875891	31688	0	0	European
rfMRIconnectivity_ICA100edge1434__PMID33875891	Brain rfMRI	rfMRI connectivity	ICA dimension 100		33875891	31688	0	0	European
rfMRIconnectivity_ICA100edge1435__PMID33875891	Brain rfMRI	rfMRI connectivity	ICA dimension 100		33875891	31688	0	0	European
rfMRIconnectivity_ICA100edge1436__PMID33875891	Brain rfMRI	rfMRI connectivity	ICA dimension 100		33875891	31688	0	0	European
rfMRIconnectivity_ICA100edge1437__PMID33875891	Brain rfMRI	rfMRI connectivity	ICA dimension 100		33875891	31688	0	0	European
rfMRIconnectivity_ICA100edge1438__PMID33875891	Brain rfMRI	rfMRI connectivity	ICA dimension 100		33875891	31688	0	0	European
rfMRIconnectivity_ICA100edge1439__PMID33875891	Brain rfMRI	rfMRI connectivity	ICA dimension 100		33875891	31688	0	0	European
rfMRIconnectivity_ICA100edge144__PMID33875891	Brain rfMRI	rfMRI connectivity	ICA dimension 100		33875891	31688	0	0	European
rfMRIconnectivity_ICA100edge1440__PMID33875891	Brain rfMRI	rfMRI connectivity	ICA dimension 100		33875891	31688	0	0	European
rfMRIconnectivity_ICA100edge1441__PMID33875891	Brain rfMRI	rfMRI connectivity	ICA dimension 100		33875891	31688	0	0	European
rfMRIconnectivity_ICA100edge1442__PMID33875891	Brain rfMRI	rfMRI connectivity	ICA dimension 100		33875891	31688	0	0	European
rfMRIconnectivity_ICA100edge1443__PMID33875891	Brain rfMRI	rfMRI connectivity	ICA dimension 100		33875891	31688	0	0	European
rfMRIconnectivity_ICA100edge1444__PMID33875891	Brain rfMRI	rfMRI connectivity	ICA dimension 100		33875891	31688	0	0	European
rfMRIconnectivity_ICA100edge1445__PMID33875891	Brain rfMRI	rfMRI connectivity	ICA dimension 100		33875891	31688	0	0	European
rfMRIconnectivity_ICA100edge1446__PMID33875891	Brain rfMRI	rfMRI connectivity	ICA dimension 100		33875891	31688	0	0	European
rfMRIconnectivity_ICA100edge1447__PMID33875891	Brain rfMRI	rfMRI connectivity	ICA dimension 100		33875891	31688	0	0	European
rfMRIconnectivity_ICA100edge1448__PMID33875891	Brain rfMRI	rfMRI connectivity	ICA dimension 100		33875891	31688	0	0	European
rfMRIconnectivity_ICA100edge1449__PMID33875891	Brain rfMRI	rfMRI connectivity	ICA dimension 100		33875891	31688	0	0	European
rfMRIconnectivity_ICA100edge145__PMID33875891	Brain rfMRI	rfMRI connectivity	ICA dimension 100		33875891	31688	0	0	European
rfMRIconnectivity_ICA100edge1450__PMID33875891	Brain rfMRI	rfMRI connectivity	ICA dimension 100		33875891	31688	0	0	European
rfMRIconnectivity_ICA100edge1451__PMID33875891	Brain rfMRI	rfMRI connectivity	ICA dimension 100		33875891	31688	0	0	European
rfMRIconnectivity_ICA100edge1452__PMID33875891	Brain rfMRI	rfMRI connectivity	ICA dimension 100		33875891	31688	0	0	European
rfMRIconnectivity_ICA100edge1453__PMID33875891	Brain rfMRI	rfMRI connectivity	ICA dimension 100		33875891	31688	0	0	European
rfMRIconnectivity_ICA100edge1454__PMID33875891	Brain rfMRI	rfMRI connectivity	ICA dimension 100		33875891	31688	0	0	European
rfMRIconnectivity_ICA100edge1455__PMID33875891	Brain rfMRI	rfMRI connectivity	ICA dimension 100		33875891	31688	0	0	European
rfMRIconnectivity_ICA100edge1456__PMID33875891	Brain rfMRI	rfMRI connectivity	ICA dimension 100		33875891	31688	0	0	European
rfMRIconnectivity_ICA100edge1457__PMID33875891	Brain rfMRI	rfMRI connectivity	ICA dimension 100		33875891	31688	0	0	European
rfMRIconnectivity_ICA100edge1458__PMID33875891	Brain rfMRI	rfMRI connectivity	ICA dimension 100		33875891	31688	0	0	European
rfMRIconnectivity_ICA100edge1459__PMID33875891	Brain rfMRI	rfMRI connectivity	ICA dimension 100		33875891	31688	0	0	European
rfMRIconnectivity_ICA100edge146__PMID33875891	Brain rfMRI	rfMRI connectivity	ICA dimension 100		33875891	31688	0	0	European
rfMRIconnectivity_ICA100edge1460__PMID33875891	Brain rfMRI	rfMRI connectivity	ICA dimension 100		33875891	31688	0	0	European
rfMRIconnectivity_ICA100edge1461__PMID33875891	Brain rfMRI	rfMRI connectivity	ICA dimension 100		33875891	31688	0	0	European
rfMRIconnectivity_ICA100edge1462__PMID33875891	Brain rfMRI	rfMRI connectivity	ICA dimension 100		33875891	31688	0	0	European
rfMRIconnectivity_ICA100edge1463__PMID33875891	Brain rfMRI	rfMRI connectivity	ICA dimension 100		33875891	31688	0	0	European
rfMRIconnectivity_ICA100edge1464__PMID33875891	Brain rfMRI	rfMRI connectivity	ICA dimension 100		33875891	31688	0	0	European
rfMRIconnectivity_ICA100edge1465__PMID33875891	Brain rfMRI	rfMRI connectivity	ICA dimension 100		33875891	31688	0	0	European
rfMRIconnectivity_ICA100edge1466__PMID33875891	Brain rfMRI	rfMRI connectivity	ICA dimension 100		33875891	31688	0	0	European
rfMRIconnectivity_ICA100edge1467__PMID33875891	Brain rfMRI	rfMRI connectivity	ICA dimension 100		33875891	31688	0	0	European
rfMRIconnectivity_ICA100edge1468__PMID33875891	Brain rfMRI	rfMRI connectivity	ICA dimension 100		33875891	31688	0	0	European
rfMRIconnectivity_ICA100edge1469__PMID33875891	Brain rfMRI	rfMRI connectivity	ICA dimension 100		33875891	31688	0	0	European
rfMRIconnectivity_ICA100edge147__PMID33875891	Brain rfMRI	rfMRI connectivity	ICA dimension 100		33875891	31688	0	0	European
rfMRIconnectivity_ICA100edge1470__PMID33875891	Brain rfMRI	rfMRI connectivity	ICA dimension 100		33875891	31688	0	0	European
rfMRIconnectivity_ICA100edge1471__PMID33875891	Brain rfMRI	rfMRI connectivity	ICA dimension 100		33875891	31688	0	0	European
rfMRIconnectivity_ICA100edge1472__PMID33875891	Brain rfMRI	rfMRI connectivity	ICA dimension 100		33875891	31688	0	0	European
rfMRIconnectivity_ICA100edge1473__PMID33875891	Brain rfMRI	rfMRI connectivity	ICA dimension 100		33875891	31688	0	0	European
rfMRIconnectivity_ICA100edge1474__PMID33875891	Brain rfMRI	rfMRI connectivity	ICA dimension 100		33875891	31688	0	0	European
rfMRIconnectivity_ICA100edge1475__PMID33875891	Brain rfMRI	rfMRI connectivity	ICA dimension 100		33875891	31688	0	0	European
rfMRIconnectivity_ICA100edge1476__PMID33875891	Brain rfMRI	rfMRI connectivity	ICA dimension 100		33875891	31688	0	0	European
rfMRIconnectivity_ICA100edge1477__PMID33875891	Brain rfMRI	rfMRI connectivity	ICA dimension 100		33875891	31688	0	0	European
rfMRIconnectivity_ICA100edge1478__PMID33875891	Brain rfMRI	rfMRI connectivity	ICA dimension 100		33875891	31688	0	0	European
rfMRIconnectivity_ICA100edge1479__PMID33875891	Brain rfMRI	rfMRI connectivity	ICA dimension 100		33875891	31688	0	0	European
rfMRIconnectivity_ICA100edge148__PMID33875891	Brain rfMRI	rfMRI connectivity	ICA dimension 100		33875891	31688	0	0	European
rfMRIconnectivity_ICA100edge1480__PMID33875891	Brain rfMRI	rfMRI connectivity	ICA dimension 100		33875891	31688	0	0	European
rfMRIconnectivity_ICA100edge1481__PMID33875891	Brain rfMRI	rfMRI connectivity	ICA dimension 100		33875891	31688	0	0	European
rfMRIconnectivity_ICA100edge1482__PMID33875891	Brain rfMRI	rfMRI connectivity	ICA dimension 100		33875891	31688	0	0	European
rfMRIconnectivity_ICA100edge1483__PMID33875891	Brain rfMRI	rfMRI connectivity	ICA dimension 100		33875891	31688	0	0	European
rfMRIconnectivity_ICA100edge1484__PMID33875891	Brain rfMRI	rfMRI connectivity	ICA dimension 100		33875891	31688	0	0	European
rfMRIconnectivity_ICA100edge1485__PMID33875891	Brain rfMRI	rfMRI connectivity	ICA dimension 100		33875891	31688	0	0	European
rfMRIconnectivity_ICA100edge149__PMID33875891	Brain rfMRI	rfMRI connectivity	ICA dimension 100		33875891	31688	0	0	European
rfMRIconnectivity_ICA100edge15__PMID33875891	Brain rfMRI	rfMRI connectivity	ICA dimension 100		33875891	31688	0	0	European
rfMRIconnectivity_ICA100edge150__PMID33875891	Brain rfMRI	rfMRI connectivity	ICA dimension 100		33875891	31688	0	0	European
rfMRIconnectivity_ICA100edge151__PMID33875891	Brain rfMRI	rfMRI connectivity	ICA dimension 100		33875891	31688	0	0	European
rfMRIconnectivity_ICA100edge152__PMID33875891	Brain rfMRI	rfMRI connectivity	ICA dimension 100		33875891	31688	0	0	European
rfMRIconnectivity_ICA100edge153__PMID33875891	Brain rfMRI	rfMRI connectivity	ICA dimension 100		33875891	31688	0	0	European
rfMRIconnectivity_ICA100edge154__PMID33875891	Brain rfMRI	rfMRI connectivity	ICA dimension 100		33875891	31688	0	0	European
rfMRIconnectivity_ICA100edge155__PMID33875891	Brain rfMRI	rfMRI connectivity	ICA dimension 100		33875891	31688	0	0	European
rfMRIconnectivity_ICA100edge156__PMID33875891	Brain rfMRI	rfMRI connectivity	ICA dimension 100		33875891	31688	0	0	European
rfMRIconnectivity_ICA100edge157__PMID33875891	Brain rfMRI	rfMRI connectivity	ICA dimension 100		33875891	31688	0	0	European
rfMRIconnectivity_ICA100edge158__PMID33875891	Brain rfMRI	rfMRI connectivity	ICA dimension 100		33875891	31688	0	0	European
rfMRIconnectivity_ICA100edge159__PMID33875891	Brain rfMRI	rfMRI connectivity	ICA dimension 100		33875891	31688	0	0	European
rfMRIconnectivity_ICA100edge16__PMID33875891	Brain rfMRI	rfMRI connectivity	ICA dimension 100		33875891	31688	0	0	European
rfMRIconnectivity_ICA100edge160__PMID33875891	Brain rfMRI	rfMRI connectivity	ICA dimension 100		33875891	31688	0	0	European
rfMRIconnectivity_ICA100edge161__PMID33875891	Brain rfMRI	rfMRI connectivity	ICA dimension 100		33875891	31688	0	0	European
rfMRIconnectivity_ICA100edge162__PMID33875891	Brain rfMRI	rfMRI connectivity	ICA dimension 100		33875891	31688	0	0	European
rfMRIconnectivity_ICA100edge163__PMID33875891	Brain rfMRI	rfMRI connectivity	ICA dimension 100		33875891	31688	0	0	European
rfMRIconnectivity_ICA100edge164__PMID33875891	Brain rfMRI	rfMRI connectivity	ICA dimension 100		33875891	31688	0	0	European
rfMRIconnectivity_ICA100edge165__PMID33875891	Brain rfMRI	rfMRI connectivity	ICA dimension 100		33875891	31688	0	0	European
rfMRIconnectivity_ICA100edge166__PMID33875891	Brain rfMRI	rfMRI connectivity	ICA dimension 100		33875891	31688	0	0	European
rfMRIconnectivity_ICA100edge167__PMID33875891	Brain rfMRI	rfMRI connectivity	ICA dimension 100		33875891	31688	0	0	European
rfMRIconnectivity_ICA100edge168__PMID33875891	Brain rfMRI	rfMRI connectivity	ICA dimension 100		33875891	31688	0	0	European
rfMRIconnectivity_ICA100edge169__PMID33875891	Brain rfMRI	rfMRI connectivity	ICA dimension 100		33875891	31688	0	0	European
rfMRIconnectivity_ICA100edge17__PMID33875891	Brain rfMRI	rfMRI connectivity	ICA dimension 100		33875891	31688	0	0	European
rfMRIconnectivity_ICA100edge170__PMID33875891	Brain rfMRI	rfMRI connectivity	ICA dimension 100		33875891	31688	0	0	European
rfMRIconnectivity_ICA100edge171__PMID33875891	Brain rfMRI	rfMRI connectivity	ICA dimension 100		33875891	31688	0	0	European
rfMRIconnectivity_ICA100edge172__PMID33875891	Brain rfMRI	rfMRI connectivity	ICA dimension 100		33875891	31688	0	0	European
rfMRIconnectivity_ICA100edge173__PMID33875891	Brain rfMRI	rfMRI connectivity	ICA dimension 100		33875891	31688	0	0	European
rfMRIconnectivity_ICA100edge174__PMID33875891	Brain rfMRI	rfMRI connectivity	ICA dimension 100		33875891	31688	0	0	European
rfMRIconnectivity_ICA100edge175__PMID33875891	Brain rfMRI	rfMRI connectivity	ICA dimension 100		33875891	31688	0	0	European
rfMRIconnectivity_ICA100edge176__PMID33875891	Brain rfMRI	rfMRI connectivity	ICA dimension 100		33875891	31688	0	0	European
rfMRIconnectivity_ICA100edge177__PMID33875891	Brain rfMRI	rfMRI connectivity	ICA dimension 100		33875891	31688	0	0	European
rfMRIconnectivity_ICA100edge178__PMID33875891	Brain rfMRI	rfMRI connectivity	ICA dimension 100		33875891	31688	0	0	European
rfMRIconnectivity_ICA100edge179__PMID33875891	Brain rfMRI	rfMRI connectivity	ICA dimension 100		33875891	31688	0	0	European
rfMRIconnectivity_ICA100edge18__PMID33875891	Brain rfMRI	rfMRI connectivity	ICA dimension 100		33875891	31688	0	0	European
rfMRIconnectivity_ICA100edge180__PMID33875891	Brain rfMRI	rfMRI connectivity	ICA dimension 100		33875891	31688	0	0	European
rfMRIconnectivity_ICA100edge181__PMID33875891	Brain rfMRI	rfMRI connectivity	ICA dimension 100		33875891	31688	0	0	European
rfMRIconnectivity_ICA100edge182__PMID33875891	Brain rfMRI	rfMRI connectivity	ICA dimension 100		33875891	31688	0	0	European
rfMRIconnectivity_ICA100edge183__PMID33875891	Brain rfMRI	rfMRI connectivity	ICA dimension 100		33875891	31688	0	0	European
rfMRIconnectivity_ICA100edge184__PMID33875891	Brain rfMRI	rfMRI connectivity	ICA dimension 100		33875891	31688	0	0	European
rfMRIconnectivity_ICA100edge185__PMID33875891	Brain rfMRI	rfMRI connectivity	ICA dimension 100		33875891	31688	0	0	European
rfMRIconnectivity_ICA100edge186__PMID33875891	Brain rfMRI	rfMRI connectivity	ICA dimension 100		33875891	31688	0	0	European
rfMRIconnectivity_ICA100edge187__PMID33875891	Brain rfMRI	rfMRI connectivity	ICA dimension 100		33875891	31688	0	0	European
rfMRIconnectivity_ICA100edge188__PMID33875891	Brain rfMRI	rfMRI connectivity	ICA dimension 100		33875891	31688	0	0	European
rfMRIconnectivity_ICA100edge189__PMID33875891	Brain rfMRI	rfMRI connectivity	ICA dimension 100		33875891	31688	0	0	European
rfMRIconnectivity_ICA100edge19__PMID33875891	Brain rfMRI	rfMRI connectivity	ICA dimension 100		33875891	31688	0	0	European
rfMRIconnectivity_ICA100edge190__PMID33875891	Brain rfMRI	rfMRI connectivity	ICA dimension 100		33875891	31688	0	0	European
rfMRIconnectivity_ICA100edge191__PMID33875891	Brain rfMRI	rfMRI connectivity	ICA dimension 100		33875891	31688	0	0	European
rfMRIconnectivity_ICA100edge192__PMID33875891	Brain rfMRI	rfMRI connectivity	ICA dimension 100		33875891	31688	0	0	European
rfMRIconnectivity_ICA100edge193__PMID33875891	Brain rfMRI	rfMRI connectivity	ICA dimension 100		33875891	31688	0	0	European
rfMRIconnectivity_ICA100edge194__PMID33875891	Brain rfMRI	rfMRI connectivity	ICA dimension 100		33875891	31688	0	0	European
rfMRIconnectivity_ICA100edge195__PMID33875891	Brain rfMRI	rfMRI connectivity	ICA dimension 100		33875891	31688	0	0	European
rfMRIconnectivity_ICA100edge196__PMID33875891	Brain rfMRI	rfMRI connectivity	ICA dimension 100		33875891	31688	0	0	European
rfMRIconnectivity_ICA100edge197__PMID33875891	Brain rfMRI	rfMRI connectivity	ICA dimension 100		33875891	31688	0	0	European
rfMRIconnectivity_ICA100edge198__PMID33875891	Brain rfMRI	rfMRI connectivity	ICA dimension 100		33875891	31688	0	0	European
rfMRIconnectivity_ICA100edge199__PMID33875891	Brain rfMRI	rfMRI connectivity	ICA dimension 100		33875891	31688	0	0	European
rfMRIconnectivity_ICA100edge2__PMID33875891	Brain rfMRI	rfMRI connectivity	ICA dimension 100		33875891	31688	0	0	European
rfMRIconnectivity_ICA100edge20__PMID33875891	Brain rfMRI	rfMRI connectivity	ICA dimension 100		33875891	31688	0	0	European
rfMRIconnectivity_ICA100edge200__PMID33875891	Brain rfMRI	rfMRI connectivity	ICA dimension 100		33875891	31688	0	0	European
rfMRIconnectivity_ICA100edge201__PMID33875891	Brain rfMRI	rfMRI connectivity	ICA dimension 100		33875891	31688	0	0	European
rfMRIconnectivity_ICA100edge202__PMID33875891	Brain rfMRI	rfMRI connectivity	ICA dimension 100		33875891	31688	0	0	European
rfMRIconnectivity_ICA100edge203__PMID33875891	Brain rfMRI	rfMRI connectivity	ICA dimension 100		33875891	31688	0	0	European
rfMRIconnectivity_ICA100edge204__PMID33875891	Brain rfMRI	rfMRI connectivity	ICA dimension 100		33875891	31688	0	0	European
rfMRIconnectivity_ICA100edge205__PMID33875891	Brain rfMRI	rfMRI connectivity	ICA dimension 100		33875891	31688	0	0	European
rfMRIconnectivity_ICA100edge206__PMID33875891	Brain rfMRI	rfMRI connectivity	ICA dimension 100		33875891	31688	0	0	European
rfMRIconnectivity_ICA100edge207__PMID33875891	Brain rfMRI	rfMRI connectivity	ICA dimension 100		33875891	31688	0	0	European
rfMRIconnectivity_ICA100edge208__PMID33875891	Brain rfMRI	rfMRI connectivity	ICA dimension 100		33875891	31688	0	0	European
rfMRIconnectivity_ICA100edge209__PMID33875891	Brain rfMRI	rfMRI connectivity	ICA dimension 100		33875891	31688	0	0	European
rfMRIconnectivity_ICA100edge21__PMID33875891	Brain rfMRI	rfMRI connectivity	ICA dimension 100		33875891	31688	0	0	European
rfMRIconnectivity_ICA100edge210__PMID33875891	Brain rfMRI	rfMRI connectivity	ICA dimension 100		33875891	31688	0	0	European
rfMRIconnectivity_ICA100edge211__PMID33875891	Brain rfMRI	rfMRI connectivity	ICA dimension 100		33875891	31688	0	0	European
rfMRIconnectivity_ICA100edge212__PMID33875891	Brain rfMRI	rfMRI connectivity	ICA dimension 100		33875891	31688	0	0	European
rfMRIconnectivity_ICA100edge213__PMID33875891	Brain rfMRI	rfMRI connectivity	ICA dimension 100		33875891	31688	0	0	European
rfMRIconnectivity_ICA100edge214__PMID33875891	Brain rfMRI	rfMRI connectivity	ICA dimension 100		33875891	31688	0	0	European
rfMRIconnectivity_ICA100edge215__PMID33875891	Brain rfMRI	rfMRI connectivity	ICA dimension 100		33875891	31688	0	0	European
rfMRIconnectivity_ICA100edge216__PMID33875891	Brain rfMRI	rfMRI connectivity	ICA dimension 100		33875891	31688	0	0	European
rfMRIconnectivity_ICA100edge217__PMID33875891	Brain rfMRI	rfMRI connectivity	ICA dimension 100		33875891	31688	0	0	European
rfMRIconnectivity_ICA100edge218__PMID33875891	Brain rfMRI	rfMRI connectivity	ICA dimension 100		33875891	31688	0	0	European
rfMRIconnectivity_ICA100edge219__PMID33875891	Brain rfMRI	rfMRI connectivity	ICA dimension 100		33875891	31688	0	0	European
rfMRIconnectivity_ICA100edge22__PMID33875891	Brain rfMRI	rfMRI connectivity	ICA dimension 100		33875891	31688	0	0	European
rfMRIconnectivity_ICA100edge220__PMID33875891	Brain rfMRI	rfMRI connectivity	ICA dimension 100		33875891	31688	0	0	European
rfMRIconnectivity_ICA100edge221__PMID33875891	Brain rfMRI	rfMRI connectivity	ICA dimension 100		33875891	31688	0	0	European
rfMRIconnectivity_ICA100edge222__PMID33875891	Brain rfMRI	rfMRI connectivity	ICA dimension 100		33875891	31688	0	0	European
rfMRIconnectivity_ICA100edge223__PMID33875891	Brain rfMRI	rfMRI connectivity	ICA dimension 100		33875891	31688	0	0	European
rfMRIconnectivity_ICA100edge224__PMID33875891	Brain rfMRI	rfMRI connectivity	ICA dimension 100		33875891	31688	0	0	European
rfMRIconnectivity_ICA100edge225__PMID33875891	Brain rfMRI	rfMRI connectivity	ICA dimension 100		33875891	31688	0	0	European
rfMRIconnectivity_ICA100edge226__PMID33875891	Brain rfMRI	rfMRI connectivity	ICA dimension 100		33875891	31688	0	0	European
rfMRIconnectivity_ICA100edge227__PMID33875891	Brain rfMRI	rfMRI connectivity	ICA dimension 100		33875891	31688	0	0	European
rfMRIconnectivity_ICA100edge228__PMID33875891	Brain rfMRI	rfMRI connectivity	ICA dimension 100		33875891	31688	0	0	European
rfMRIconnectivity_ICA100edge229__PMID33875891	Brain rfMRI	rfMRI connectivity	ICA dimension 100		33875891	31688	0	0	European
rfMRIconnectivity_ICA100edge23__PMID33875891	Brain rfMRI	rfMRI connectivity	ICA dimension 100		33875891	31688	0	0	European
rfMRIconnectivity_ICA100edge230__PMID33875891	Brain rfMRI	rfMRI connectivity	ICA dimension 100		33875891	31688	0	0	European
rfMRIconnectivity_ICA100edge231__PMID33875891	Brain rfMRI	rfMRI connectivity	ICA dimension 100		33875891	31688	0	0	European
rfMRIconnectivity_ICA100edge232__PMID33875891	Brain rfMRI	rfMRI connectivity	ICA dimension 100		33875891	31688	0	0	European
rfMRIconnectivity_ICA100edge233__PMID33875891	Brain rfMRI	rfMRI connectivity	ICA dimension 100		33875891	31688	0	0	European
rfMRIconnectivity_ICA100edge234__PMID33875891	Brain rfMRI	rfMRI connectivity	ICA dimension 100		33875891	31688	0	0	European
rfMRIconnectivity_ICA100edge235__PMID33875891	Brain rfMRI	rfMRI connectivity	ICA dimension 100		33875891	31688	0	0	European
rfMRIconnectivity_ICA100edge236__PMID33875891	Brain rfMRI	rfMRI connectivity	ICA dimension 100		33875891	31688	0	0	European
rfMRIconnectivity_ICA100edge237__PMID33875891	Brain rfMRI	rfMRI connectivity	ICA dimension 100		33875891	31688	0	0	European
rfMRIconnectivity_ICA100edge238__PMID33875891	Brain rfMRI	rfMRI connectivity	ICA dimension 100		33875891	31688	0	0	European
rfMRIconnectivity_ICA100edge239__PMID33875891	Brain rfMRI	rfMRI connectivity	ICA dimension 100		33875891	31688	0	0	European
rfMRIconnectivity_ICA100edge24__PMID33875891	Brain rfMRI	rfMRI connectivity	ICA dimension 100		33875891	31688	0	0	European
rfMRIconnectivity_ICA100edge240__PMID33875891	Brain rfMRI	rfMRI connectivity	ICA dimension 100		33875891	31688	0	0	European
rfMRIconnectivity_ICA100edge241__PMID33875891	Brain rfMRI	rfMRI connectivity	ICA dimension 100		33875891	31688	0	0	European
rfMRIconnectivity_ICA100edge242__PMID33875891	Brain rfMRI	rfMRI connectivity	ICA dimension 100		33875891	31688	0	0	European
rfMRIconnectivity_ICA100edge243__PMID33875891	Brain rfMRI	rfMRI connectivity	ICA dimension 100		33875891	31688	0	0	European
rfMRIconnectivity_ICA100edge244__PMID33875891	Brain rfMRI	rfMRI connectivity	ICA dimension 100		33875891	31688	0	0	European
rfMRIconnectivity_ICA100edge245__PMID33875891	Brain rfMRI	rfMRI connectivity	ICA dimension 100		33875891	31688	0	0	European
rfMRIconnectivity_ICA100edge246__PMID33875891	Brain rfMRI	rfMRI connectivity	ICA dimension 100		33875891	31688	0	0	European
rfMRIconnectivity_ICA100edge247__PMID33875891	Brain rfMRI	rfMRI connectivity	ICA dimension 100		33875891	31688	0	0	European
rfMRIconnectivity_ICA100edge248__PMID33875891	Brain rfMRI	rfMRI connectivity	ICA dimension 100		33875891	31688	0	0	European
rfMRIconnectivity_ICA100edge249__PMID33875891	Brain rfMRI	rfMRI connectivity	ICA dimension 100		33875891	31688	0	0	European
rfMRIconnectivity_ICA100edge25__PMID33875891	Brain rfMRI	rfMRI connectivity	ICA dimension 100		33875891	31688	0	0	European
rfMRIconnectivity_ICA100edge250__PMID33875891	Brain rfMRI	rfMRI connectivity	ICA dimension 100		33875891	31688	0	0	European
rfMRIconnectivity_ICA100edge251__PMID33875891	Brain rfMRI	rfMRI connectivity	ICA dimension 100		33875891	31688	0	0	European
[truncated: 999 more rows]

## Sheet: Table S6
Table S6 | McFadden’s pseudo-R² from GLMs (logit link) estimating associations between GWAS PGS and archetype scores. Values shown only for significant associations (p<0.05).
	Archetype scores
GWAS	A1	A2	A3	A4	A5
Able_to_confide_PMID31427789
Addiction_PMID37250466
ADHD_Adulthood_PMID35927488
ADHD_Childhood_PMID35927488					0.0213175
ADHD_Disruptive_behavior_PMID33495439
ADHD_Persistent_PMID35927488
ADHD_PMID36702997					0.0177128
Age_completed_full_time_education_PMID31427789	0.0252447
Age_first_had_sexual_intercourse_PMID31427789
Age_of_initiation_of_regular_smoking_PMID30643251
Aggression_PMID26087016
Agreeableness_PMID38293137
Alcohol_Alcohol_drinker_status_Never_PMID31427789
Alcohol_Alcohol_drinker_status_Previous_vs_Current_PMID31427789			0.0165838
Alcohol_intake_frequency_PMID31427789
Alcohol_use_disorder_PMID30482948
Amount_of_alcohol_drunk_on_a_typical_drinking_day_PMID31427789
Anorexia_nervosa_PMID31308545
Antidepressant_use_PMID31015401
Antisocial_behavior_PMID36284158
Anxiety_and_stress_related_disorders_PMID31116379
Anxiety_Ever_felt_worried_tense_or_anxious_for_most_of_a_month_or_longer_PMID31427789
Anxiety_Ever_worried_more_than_most_people_would_in_similar_situation_PMID31427789				0.0187824
Anxiety_PMID26754954					0.017448
Anxiety_Reccent_feelings_or_nervousness_or_anxiety_PMID31427789
Anxiety_Recent_easy_annoyance_or_irritability_PMID31427789
Anxiety_Recent_feelings_of_foreboding_PMID31427789
Anxiety_Recent_inability_to_stop_or_control_worying_PMID31427789
Anxiety_Recent_restlessness_PMID31427789
Anxiety_Recent_trouble_relaxing_PMID31427789	0.0154919	0.0158513
Anxiety_Recent_worrying_too_much_about_different_things_PMID31427789
Anxiety_tension_factors_PMID30867560
Attention_Functions_Allerting_PMID27656889
Attention_Functions_Executive_function_PMID27656889
Attention_Functions_Hit_reaction_time_PMID27656889				0.032906
Attention_Functions_Orienting_PMID27656889
Attention_Functions_SD_of_hit_reaction_time_PMID27656889	0.0319373
Autism_spectrum_disorder_PMID30804558	0.0287021				0.023572
Bipolar_and_major_depression_status_PMID31427789
Bipolar_disorder_community_PMID39843750
Bipolar_disorder_PMID39843750	0.0200842	0.0323792
Bipolar_disorder_self_reported_PMID39843750
Borderline_Personality_Disorder_PMID28632202
Broad_depression_PMID29662059
canabis_use_disorder_PMID33096046
Cannabis_use_Ever_taken_cannabis_PMID31427789
Childhood_Absence_Epilepsy_PMID30531953
Childhood_IQ_PMID23358156
Chronotyp_Morningness_PMID30696823
Chronotype_Binary_PMID30696823
Cluster_headache_PMID27957625
Cognitive_performance_PMID30038396
College_completion_PMID23722424
Conscientiousness_PMID38293137
Cross_disorder_ASD_ADHD_PMID30692689	0.0234942				0.0392609
Cross_disorder_PMID36471075		0.0164136			0.0258064
Daytime_napping_PMID30804565
Daytime_sleepiness_dozing_PMID30804565
Depression_Age_at_first_episode_of_depression_PMID31427789					0.0155971
Depression_Age_at_last_episode_of_depression_PMID31427789
Depression_Depression_possibly_related_to_stressful_or_traumatic_event_PMID31427789
Depression_Did_your_sleep_change_PMID31427789		0.0161972		0.0222876
Depression_Difficulty_concentrating_during_worst_ddepression_PMID31427789
Depression_Duration_of_worst_depression_PMID31427789
Depression_Ever_had_prolonged_feelings_of_sadness_or_depression_PMID31427789
Depression_Ever_had_prolonged_loss_of_interest_in_normal_activities_PMID31427789
Depression_Feelings_of_tiredness_during_worst_episode_of_depression_PMID31427789		0.0209007
Depression_Feelings_of_worthlessness_during_worst_period_of_depression_PMID31427789				0.0261106
Depression_Fraction_of_day_affected_during_worst_episode_of_depression_PMID31427789
Depression_Frequency_of_depressed_days_during_worst_episode_of_depression_PMID31427789
Depression_Impact_of_normal_roles_during_worst_period_of_depression_PMID31427789			0.0228009
Depression_Lifetime_number_of_depressed_periods_PMID31427789
[truncated: 2,925 more rows]

## Sheet: Table S7
Table S7 | GLM model estimates and marginal effects for the association between PGS and archetype scores.
[truncated: 14,986 more rows]

[truncated: 5 more sheets: Table S8, Table S9, Table S10, Table S11, Table S12]
