# Supplementary material for: Psychometric archetypes reveal biological signatures of vulnerability, resilience, and future mental health
Source: Research Square preprint supplement (doi:10.21203/rs.3.rs-8594362/v1), 2026-02-03
Supplement: Supplementary file 3 [file f3b2e18d53e9b86c67cd7f5d.pdf]

|                                                                  | A1       | A2      | A3       | A4       | A5      | Mixed    |
|------------------------------------------------------------------|----------|---------|----------|----------|---------|----------|
| <b># of individuals at follow-up</b>                             | 16       | 17      | 18       | 33       | 25      | 84       |
| with any psychiatric diagnosis at follow-up (none at baseline)   | 7 (44%)  | 4 (24%) | 9 (50%)  | 4 (12%)  | 4 (16%) | 12 (14%) |
| with any psychiatric diagnosis at follow-up                      | 9 (56%)  | 6 (35%) | 9 (50%)  | 10 (30%) | 5 (20%) | 21 (25%) |
| with comorbid psychiatric diagnosis at follow-up                 | 5 (31%)  | 2 (12%) | 4 (22%)  | 2 (6%)   | 1 (4%)  | 10 (12%) |
| with comorbid psychiatric diagnosis across baseline or follow-up | 6 (38%)  | 4 (24%) | 6 (33%)  | 3 (9%)   | 1 (4%)  | 11 (13%) |
| with any psychiatric diagnosis at baseline or follow-up          | 14 (88%) | 9 (53%) | 12 (67%) | 10 (30%) | 5 (20%) | 24 (29%) |

**Diagnostic entities:**

|                                      |   |   |   |   |   |    |
|--------------------------------------|---|---|---|---|---|----|
| Depression                           | 8 | 3 | 4 | 6 | 2 | 14 |
| Bipolar disorder                     | 0 | 0 | 0 | 0 | 0 | 0  |
| Schizophrenia                        | 0 | 0 | 0 | 0 | 0 | 0  |
| Other psychosis or psychotic illness | 0 | 0 | 1 | 0 | 0 | 0  |
| Personality disorder                 | 0 | 0 | 0 | 0 | 0 | 1  |
| Autism                               | 0 | 0 | 1 | 0 | 0 | 4  |
| ADHD                                 | 4 | 1 | 4 | 0 | 1 | 6  |
| OCD                                  | 0 | 0 | 0 | 0 | 0 | 0  |
| Anxiety or nerves                    | 3 | 2 | 2 | 2 | 2 | 4  |
| Generalized anxiety disorder         | 1 | 0 | 2 | 2 | 2 | 3  |
| Social anxiety or phobia             | 1 | 1 | 1 | 1 | 0 | 3  |
| Agoraphobia                          | 0 | 0 | 0 | 0 | 0 | 0  |
| Other phobias                        | 1 | 0 | 1 | 1 | 0 | 0  |
| Panic attacks                        | 3 | 0 | 2 | 0 | 0 | 2  |
| Panic disorder                       | 0 | 0 | 0 | 0 | 0 | 0  |
| PTSD                                 | 0 | 0 | 1 | 0 | 0 | 1  |
| Anorexia nervosa                     | 1 | 0 | 0 | 0 | 0 | 0  |
| Bulimia nervosa                      | 1 | 1 | 0 | 0 | 0 | 0  |
| Binge eating disorder                | 0 | 0 | 0 | 1 | 0 | 0  |
| Other eating disorder                | 0 | 0 | 0 | 0 | 1 | 0  |
